# Supplementary material for: New β-carboline fluorophores with superior sensitivity and endoplasmic reticulum specificity for tracking ER changes
Source: Royal Society of Chemistry journal article supplement (doi:10.1039/c9cc03370j), 2019-01-01

# New $\beta$ -carboline fluorophores with superior sensitivity and endoplasmic reticulum specificity for tracking ER changes

WentengChen,<sup>#,a</sup>JiaanShao,<sup>#,b</sup>YujieHuang,<sup>#,c</sup>EnChen,<sup>a</sup>MingzhuHuang,<sup>c</sup>Feng Han,<sup>d</sup>Xingguang Liang,<sup>\*,c</sup>Yongping Yu<sup>\*,a</sup>

a. College of Pharmaceutical Sciences, Zhejiang University, Hangzhou, 310058, China, yyu@zju.edu.cn;

b. School of Medicine, Zhejiang University City College, Hangzhou, 310015, China.

c. Key Laboratory of Clinical In Vitro Diagnostic Techniques of Zhejiang Province, First Affiliated Hospital, School of Medicine, Zhejiang University, Hangzhou, 310003, China, lrvin@zju.edu.cn;

d. School of Pharmacy, Nanjing Medical University, Nanjing, 211166, China

e. Key Laboratory of Drug Clinical Research and Evaluation Technology of Zhejiang Province, First Affiliated Hospital, School of Medicine, Zhejiang University, Hangzhou, 310003, China

# These authors contributed equally

## Supporting Information

### List of contents

|                                                                            |         |
|----------------------------------------------------------------------------|---------|
| General Procedure for the Synthesis of <b>3</b> .....                      | S2      |
| Characterization Data of compound <b>3</b> .....                           | S2-S13  |
| General Procedure for the biological evaluation of compound <b>3</b> ..... | S14-S15 |
| Supplementary Tables and Figures.....                                      | S16-S27 |
| <sup>1</sup> H and <sup>13</sup> C NMR spectra .....                       | S28-S51 |

## General Information

All solvents were purified according to standard methods prior to use. Melting points were recorded on a BÜCHI B-540 melting point apparatus. NMR spectra were recorded for  $^1\text{H}$  NMR at 500 MHz and for  $^{13}\text{C}$  NMR at 125 MHz. For  $^1\text{H}$  NMR, tetramethylsilane (TMS) ( $\delta=0$ ) or DMSO ( $\delta=2.50$ ) served as internal standard and data are reported as follows: chemical shift, integration, multiplicity (s = singlet, d = doublet, t = triplet, q = quartet, m = multiplet), and coupling constant(s) in Hz. For  $^{13}\text{C}$  NMR, TMS ( $\delta=0$ ) or DMSO ( $\delta=39.52$ ) was used as internal standard and spectra were obtained with complete proton decoupling. HPLC analysis and the HRMS of all final products were confirmed on a Agilent 1290 HPLC-6224 Time of Flight Mass Spectrometer using PhenomenexLuna  $5\mu$  C18, 100 Å, 150 X 4.60 mm 5 micron column at a flow rate of 0.5 mL/min using liner gradients buffer B in A (B:  $\text{CH}_3\text{OH}$  containing 0.1 % formic acid, A:  $\text{H}_2\text{O}$  containing 0.1% formic acid). Mobile phase B was increased linearly from 5% to 95% over 7 min and 95% over the next 2 min, after which the column was equilibrated to 5% for 1 min. The glyoxal monohydrates **2** were synthesized according to the method of acetophenone oxidation by DMSO-HBr system or using selenium dioxide in 1, 4-dioxane-water mixture<sup>[1-2]</sup>.

1. Karpova, S. V.; Kayukova, Y. S.; Grigor'eva, A. A.; Tafeenko, V. A. *Tetrahedron Lett.* 2015, **56**, 1732-1734.
2. Antoinet M.; Gerlach M.; Güntherb, E.; Schusterb, T.; Czechb, M.; Seipeltb, I.; Marchand, P. *Synthesis* 2012, **1**, 69-82.

## General Procedure for the Synthesis of **3**:

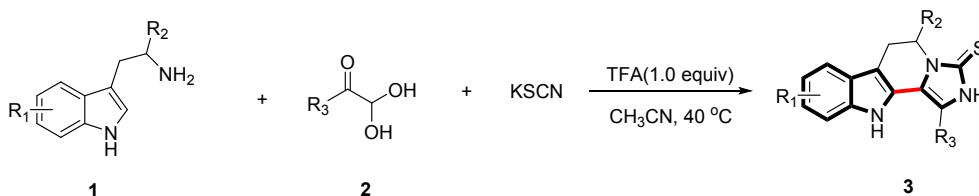

TFA (2.0mmol) was added to a mixture of tryptamine derivatives **1** (2.0 mmol), glyoxal hydrates **2** (2.0mmol) and KSCN (4.0 mmol) in  $\text{CH}_3\text{CN}$  (10 mL) and stirred at  $40^\circ\text{C}$ . After the reaction was completed (monitored by TLC), the reaction mixture was filtered, and the precipitation was washed with cold  $\text{CH}_3\text{CN}$  and crystallized with

EtOH to afford **3**.

### Characterization data of compound **3**

#### 1-phenyl-2,5,6,11-tetrahydro-3*H*-imidazo[1',5':1,2]pyrido[3,4-*b*]indole-3-thione

##### (**3a**)

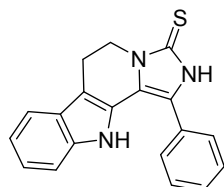

Yellow solid, m.p. >250°C. <sup>1</sup>H NMR (500 MHz, DMSO) δ 12.70 (s, 1H), 10.66 (s, 1H), 7.69-7.67 (m, 2H), 7.54-7.51 (m, 3H), 7.46-7.43 (m, 1H), 7.39 (d, *J* = 8.0 Hz, 1H), 7.12-7.09 (m, 1H), 7.06-7.02 (m, 1H), 4.14 (t, *J* = 6.5 Hz, 2H), 3.13 (t, *J* = 6.5 Hz, 2H). <sup>13</sup>C NMR (125 MHz, DMSO) δ 161.3, 137.5, 129.2, 128.4, 128.1, 127.0, 125.6, 124.1, 122.3, 121.9, 119.6, 118.1, 117.6, 112.3, 109.8, 41.7, 19.6. HRMS (ESI): *m/z* calcd for (C<sub>19</sub>H<sub>15</sub>N<sub>3</sub>S+H)<sup>+</sup>: 318.1059; found: 348.1060

#### 8-methoxy-1-phenyl-2,5,6,11-tetrahydro-3*H*-imidazo[1',5':1,2]pyrido[3,4-*b*]indole-3-thione (**3b**)

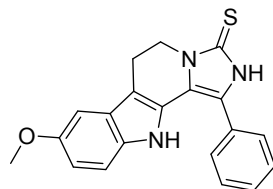

Yellow solid, m.p. >250°C. <sup>1</sup>H NMR (500 MHz, DMSO) δ 12.66 (s, 1H), 10.48 (s, 1H), 7.67 (d, *J* = 7.5 Hz, 2H), 7.52 (t, *J* = 7.5 Hz, 2H), 7.43 (t, *J* = 7.3 Hz, 1H), 7.27 (d, *J* = 8.8 Hz, 1H), 7.03 (s, 1H), 6.74 (dd, *J* = 8.8, 2.3 Hz, 1H), 4.13 (t, *J* = 6.5 Hz, 2H), 3.77 (s, 3H), 3.10 (t, *J* = 6.5 Hz, 2H). <sup>13</sup>C NMR (125 MHz, DMSO) δ 161.8, 154.4, 138.1, 133.0, 129.7, 128.8, 127.4, 126.5, 125.2, 122.2, 118.2, 113.5, 113.1, 110.1, 100.2, 55.9, 42.2, 20.1. HRMS (ESI): *m/z* calcd for (C<sub>20</sub>H<sub>17</sub>N<sub>3</sub>OS+H)<sup>+</sup>: 348.1165; found: 348.1167.

#### 8-chloro-1-phenyl-2,5,6,11-tetrahydro-3*H*-imidazo[1',5':1,2]pyrido[3,4-*b*]indole-3-thione (**3c**)

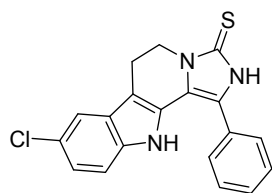

White solid, m.p. >250°C.  $^1\text{H}$  NMR (500 MHz, DMSO)  $\delta$  12.73 (s, 1H), 10.83 (s, 1H), 7.66 (d,  $J = 7.4$  Hz, 2H), 7.60 (d,  $J = 1.6$  Hz, 1H), 7.53 (t,  $J = 7.6$  Hz, 2H), 7.45 (t,  $J = 7.4$  Hz, 1H), 7.38 (d,  $J = 8.6$  Hz, 1H), 7.09 (dd,  $J = 8.6, 1.9$  Hz, 1H), 4.13 (t,  $J = 6.6$  Hz, 2H), 3.12 (t,  $J = 6.6$  Hz, 2H).  $^{13}\text{C}$  NMR (125 MHz, DMSO)  $\delta$  162.0, 136.4, 129.7, 129.0, 128.4, 127.6, 127.3, 126.3, 124.7, 123.1, 122.6, 117.9, 117.6, 114.2, 109.8, 42.0, 19.9. HRMS (ESI):  $m/z$  calcd for  $(\text{C}_{19}\text{H}_{14}\text{ClN}_3\text{S}+\text{H})^+$ : 352.0670; found: 352.0670

**8-methoxy-1-(naphthalen-2-yl)-2,5,6,11-tetrahydro-3H-imidazo[1',5':1,2]pyrido[3,4-b]indole-3-thione (3d)**

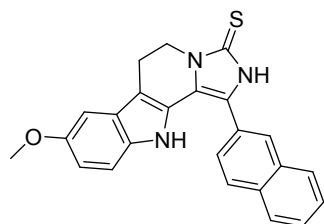

Yellow solid, m.p. >250°C.  $^1\text{H}$  NMR (500 MHz, DMSO)  $\delta$  12.61 (s, 1H), 9.85 (s, 1H), 8.15 -8.09 (m, 1H), 8.06 (d,  $J = 8.2$  Hz, 1H), 7.79 (d,  $J = 8.4$  Hz, 1H), 7.66 (q,  $J = 6.7$  Hz, 2H), 7.59 (t,  $J = 7.4$  Hz, 1H), 7.51 (t,  $J = 7.5$  Hz, 1H), 7.05 (d,  $J = 8.8$  Hz, 1H), 7.01 (d,  $J = 2.1$  Hz, 1H), 6.65 (dd,  $J = 8.8, 2.4$  Hz, 1H), 4.23 (t,  $J = 6.7$  Hz, 2H), 3.75 (s, 3H), 3.17 (t,  $J = 6.5$  Hz, 2H).  $^{13}\text{C}$  NMR (125 MHz, DMSO)  $\delta$  161.7, 154.2, 134.2, 133.0, 132.1, 130.2, 129.3, 128.9, 127.2, 126.8, 126.4, 126.4, 126.1, 125.6, 124.9, 120.0, 119.8, 113.2, 112.7, 108.9, 100.3, 55.8, 42.2, 20.2. HRMS (ESI):  $m/z$  calcd for  $(\text{C}_{24}\text{H}_{19}\text{N}_3\text{OS}+\text{H})^+$ : 398.1322; found: 398.1322.

**1-(4-(trifluoromethyl)phenyl)-2,5,6,11-tetrahydro-3H-imidazo[1',5':1,2]pyrido[3,4-b]indole-3-thione (3e)**

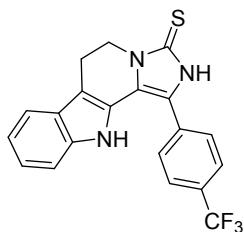

Yellow solid, m.p. >250°C.  $^1\text{H}$  NMR (500 MHz, DMSO)  $\delta$  12.86 (s, 1H), 10.80 (s, 1H), 7.86 (d,  $J$  = 8.0 Hz, 4H), 7.55 (d,  $J$  = 7.9 Hz, 1H), 7.39 (d,  $J$  = 8.1 Hz, 1H), 7.14 (dd,  $J$  = 11.1, 3.9 Hz, 1H), 7.06 (t,  $J$  = 7.4 Hz, 1H), 4.15 (t,  $J$  = 6.7 Hz, 2H), 3.15 (t,  $J$  = 6.7 Hz, 2H).  $^{13}\text{C}$  NMR (125 MHz, DMSO)  $\delta$  162.4, 138.0, 132.6, 128.6 (q,  $J$  = 31.25 Hz), 128.0, 126.5 (q,  $J$  = 3.75 Hz), 126.0, 124.7 (q,  $J$  = 270 Hz), 124.2, 123.1, 120.7, 120.1, 119.4, 118.7, 112.7, 111.1, 42.1, 20.0. HRMS (ESI):  $m/z$  calcd for  $(\text{C}_{20}\text{H}_{14}\text{F}_3\text{N}_3\text{S}+\text{H})^+$ : 386.0933; found: 386.0934.

**8-methoxy-1-(4-(trifluoromethyl) phenyl)-2,5,6,11-tetrahydro-3H-imidazo [1',5':1,2] pyrido[3,4-b] indole-3-thione (3f)**

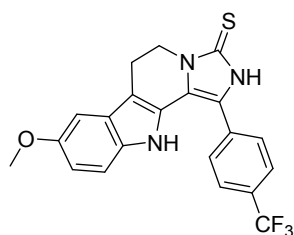

Yellow solid, m.p. >250 °C.  $^1\text{H}$  NMR (500 MHz, DMSO)  $\delta$  12.84 (s, 1H), 10.64 (s, 1H), 8.02-7.72 (m, 4H), 7.27 (d,  $J$  = 8.8 Hz, 1H), 7.06 (d,  $J$  = 2.2 Hz, 1H), 6.77 (dd,  $J$  = 8.8, 2.4 Hz, 1H), 4.14 (t,  $J$  = 6.7 Hz, 2H), 3.78 (s, 3H), 3.12 (t,  $J$  = 6.7 Hz, 2H).  $^{13}\text{C}$  NMR (125 MHz, DMSO)  $\delta$  162.3, 154.4, 133.2, 132.6, 128.6 (q,  $J$  = 31.25 Hz), 127.9, 126.5 (q,  $J$  = 3.75 Hz), 126.4, 124.7 (q,  $J$  = 270 Hz), 124.7, 120.5, 119.6, 113.5, 113.5, 111.0, 100.3, 55.8, 42.2, 20.1. HRMS (ESI):  $m/z$  calcd for  $(\text{C}_{21}\text{H}_{16}\text{F}_3\text{N}_3\text{OS}+\text{H})^+$ : 416.1039; found: 416.1041.

**8-chloro-1-(4-(trifluoromethyl) phenyl)-2,5,6,11-tetrahydro-3H-imidazo [1',5':1,2] pyrido[3,4-b] indole-3-thione (3g)**

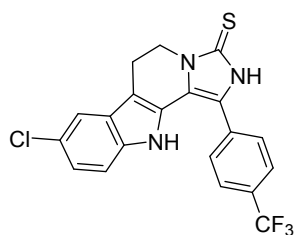

Yellow solid, m.p. >250°C,  $^1\text{H}$  NMR (500 MHz, DMSO)  $\delta$  12.91 (s, 1H), 10.98 (s, 1H), 8.02-7.72 (m, 4H), 7.63 (d,  $J$  = 2.0 Hz, 1H), 7.37 (d,  $J$  = 8.5 Hz, 1H), 7.12 (dd,  $J$  = 9.0, 2.5 Hz, 1H), 4.13 (t,  $J$  = 6.5 Hz, 2H), 3.14 (t,  $J$  = 6.5 Hz, 2H).  $^{13}\text{C}$  NMR (125 MHz, DMSO)  $\delta$  162.6, 136.5, 132.4, 128.8 (q,  $J$  = 32.5 Hz), 128.2, 127.2, 126.6 (q,  $J$  = 3.75 Hz), 125.8, 124.7 (q,  $J$  = 270 Hz), 124.8, 122.9, 121.5, 118.9, 118.1, 114.2, 110.6, 42.1, 19.9. HRMS (ESI):  $m/z$  calcd for  $(\text{C}_{20}\text{H}_{13}\text{ClF}_3\text{N}_3\text{S}+\text{H})^+$ : 420.0544; found: 420.0545

**1-(4-chlorophenyl)-2,5,6,11-tetrahydro-3H-imidazo [1',5':1,2] pyrido[3,4-b] indole-3-thione (3h)**

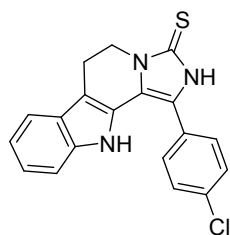

Yellow solid, m.p. >250°C,  $^1\text{H}$  NMR (500 MHz, DMSO)  $\delta$  12.74 (s, 1H), 10.69 (s, 1H), 7.66 (d,  $J$  = 8.6 Hz, 2H), 7.58 (d,  $J$  = 8.5 Hz, 2H), 7.53 (d,  $J$  = 7.8 Hz, 1H), 7.38 (d,  $J$  = 8.1 Hz, 1H), 7.17-7.09 (m, 1H), 7.04 (t,  $J$  = 7.4 Hz, 1H), 4.13 (t,  $J$  = 6.7 Hz, 2H), 3.12 (t,  $J$  = 6.7 Hz, 2H).  $^{13}\text{C}$  NMR (125 MHz, DMSO)  $\delta$  162.0, 138.0, 133.3, 129.6, 129.3, 127.4, 126.1, 124.3, 122.8, 121.1, 120.0, 118.6, 118.5, 112.6, 110.4, 42.1, 20.0. HRMS (ESI):  $m/z$  calcd for  $(\text{C}_{19}\text{H}_{14}\text{ClN}_3\text{S}+\text{H})^+$ : 352.0670; found: 352.0672

**1-(4-fluorophenyl)-2,5,6,11-tetrahydro-3H-imidazo [1',5':1,2] pyrido[3,4-b] indole-3-thione (3i)**

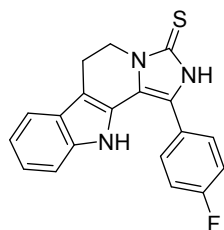

Brown solid, m.p. >250°C,  $^1\text{H}$  NMR (500 MHz, DMSO)  $\delta$  12.70 (s, 1H), 10.64 (s, 1H), 7.70-7.66 (m, 2H), 7.53 (d,  $J$  = 8.0 Hz, 1H), 7.39-7.35 (m, 3H), 7.13-7.09 (m, 1H), 7.04 (t,  $J$  = 7.5 Hz, 1H), 4.13 (t,  $J$  = 6.5 Hz, 2H), 3.12 (t,  $J$  = 6.5 Hz, 2H).  $^{13}\text{C}$  NMR (125 MHz, DMSO)  $\delta$  162.6 (d,  $J$  = 245 Hz), 161.7, 137.9, 130.0 (d,  $J$  = 7.5 Hz), 126.1, 125.1 (d,  $J$  = 2.5 Hz), 124.5, 122.8, 121.4, 120.0, 118.6, 118.2, 116.7 (d,  $J$  = 21.25 Hz), 112.7, 110.1, 42.1, 20.1. HRMS (ESI):  $m/z$  calcd for  $(\text{C}_{19}\text{H}_{14}\text{FN}_3\text{S}+\text{H})^+$ : 336.0965; found: 336.0963.

**1-(p-tolyl)-2, 5, 6, 11-tetrahydro-3H-imidazo [1', 5':1, 2] pyrido[3,4-b] indole-3-thione (3j)**

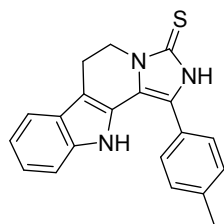

Yellow solid, m.p. >250°C,  $^1\text{H}$  NMR (500 MHz, DMSO)  $\delta$  12.63 (s, 1H), 10.59 (s, 1H), 7.56 (d,  $J$  = 8.0 Hz, 2H), 7.52 (d,  $J$  = 7.8 Hz, 1H), 7.39 (d,  $J$  = 8.1 Hz, 1H), 7.34 (d,  $J$  = 7.9 Hz, 2H), 7.10 (t,  $J$  = 7.5 Hz, 1H), 7.03 (t,  $J$  = 7.4 Hz, 1H), 4.13 (t,  $J$  = 6.6 Hz, 2H), 3.11 (t,  $J$  = 6.6 Hz, 2H), 2.39 (s, 3H).  $^{13}\text{C}$  NMR (125 MHz, DMSO)  $\delta$  161.7, 138.4, 137.9, 130.2, 127.4, 126.1, 125.8, 124.7, 122.7, 122.5, 120.0, 118.5, 117.8, 112.8, 110.0, 42.1, 21.4, 20.1. HRMS (ESI):  $m/z$  calcd for  $(\text{C}_{20}\text{H}_{17}\text{N}_3\text{S}+\text{H})^+$ : 332.1216; found: 332.1216.

**8-methoxy-1-(p-tolyl)-2,5,6,11-tetrahydro-3H-imidazo [1',5':1,2] pyrido[3,4-b] indole-3-thione (3k)**

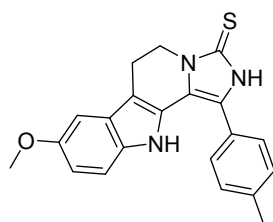

Orange solid, m.p. >250°C,  $^1\text{H}$  NMR (500 MHz, DMSO)  $\delta$  12.61 (s, 1H), 10.43 (s, 1H), 7.55 (d,  $J = 8.1$  Hz, 2H), 7.33 (d,  $J = 8.0$  Hz, 2H), 7.27 (d,  $J = 8.8$  Hz, 1H), 7.03 (d,  $J = 2.4$  Hz, 1H), 6.74 (dd,  $J = 8.8, 2.4$  Hz, 1H), 4.12 (t,  $J = 6.7$  Hz, 2H), 3.77 (s, 3H), 3.09 (t,  $J = 6.7$  Hz, 2H), 2.38 (s, 3H).  $^{13}\text{C}$  NMR (125 MHz, DMSO)  $\delta$  161.6, 154.3, 138.3, 133.0, 130.2, 127.4, 126.5, 125.8, 125.2, 122.3, 117.9, 113.5, 113.0, 109.8, 100.2, 55.8, 42.2, 21.4, 20.1. HRMS (ESI):  $m/z$  calcd for  $(\text{C}_{21}\text{H}_{19}\text{N}_3\text{OS}+\text{H})^+$ : 362.1322; found: 362.1322.

**1-(3-methoxyphenyl)-2,5,6,11-tetrahydro-3H-imidazo [1',5':1,2] pyrido[3,4-b] indole-3-thione (3l)**

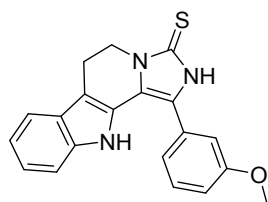

Red solid, m.p. >250°C,  $^1\text{H}$  NMR (500 MHz, DMSO)  $\delta$  12.69 (s, 1H), 10.75 (s, 1H), 7.53 (d,  $J = 7.8$  Hz, 1H), 7.42 (dd,  $J = 15.9, 8.1$  Hz, 2H), 7.29- 7.24 (m, 2H), 7.15- 7.09 (m, 1H), 7.04 (dd,  $J = 10.9, 3.9$  Hz, 1H), 7.01- 6.97 (m, 1H), 4.14 (t,  $J = 6.7$  Hz, 2H), 3.81 (s, 3H), 3.13 (t,  $J = 6.7$  Hz, 2H).  $^{13}\text{C}$  NMR (125 MHz, DMSO)  $\delta$  161.8, 160.1, 138.0, 130.8, 129.7, 126.1, 124.6, 122.8, 122.3, 120.0, 119.4, 118.6, 118.3, 115.5, 112.7, 111.8, 110.4, 55.5, 42.1, 20.1. HRMS (ESI):  $m/z$  calcd for  $(\text{C}_{20}\text{H}_{17}\text{N}_3\text{OS}+\text{H})^+$ : 348.1165; found: 348.1163.

**8-chloro-1-(3-methoxyphenyl)-2,5,6,11-tetrahydro-3H-imidazo [1',5':1,2] pyrido[3,4-b] indole-3-thione (3m)**

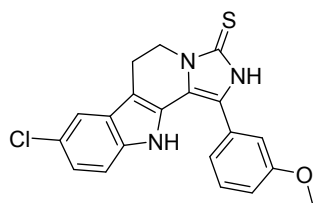

White solid, m.p. >250°C,  $^1\text{H}$  NMR (500 MHz, DMSO)  $\delta$  12.73 (s, 1H), 10.92 (s, 1H), 7.60 (s, 1H), 7.47-7.32 (m, 2H), 7.25 (d,  $J = 7.7$  Hz, 2H), 7.10 (dd,  $J = 8.6, 1.7$  Hz, 1H), 7.05-6.95 (m, 1H), 4.12 (t,  $J = 6.6$  Hz, 2H), 3.81 (s, 3H), 3.12 (t,  $J = 6.6$  Hz, 2H).  $^{13}\text{C}$  NMR (125 MHz, DMSO)  $\delta$  162.0, 160.1, 136.4, 130.8, 129.6, 127.3, 126.2, 124.7, 123.0, 122.6, 119.6, 117.9, 117.8, 115.7, 114.2, 112.0, 109.9, 55.5, 42.1, 19.9. HRMS



(ESI):  $m/z$  calcd for  $(C_{20}H_{16}ClN_3OS+H)^+$ : 382.0775; found: 382.0774.

**1-(4-hydroxyphenyl)-2,5,6,11-tetrahydro-3H-imidazo [1',5':1,2] pyrido[3,4-b] indole-3-thione (3n)**

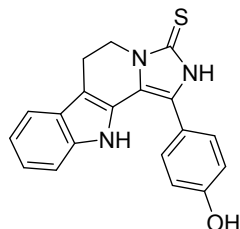

Pale solid, m.p.  $>250^{\circ}\text{C}$ ,  $^1\text{H}$  NMR (500 MHz, DMSO)  $\delta$  12.53 (s, 1H), 10.54 (s, 1H), 9.83 (s, 1H), 7.50 (d,  $J = 8.0$  Hz, 1H), 7.46 (d,  $J = 8.5$  Hz, 2H), 7.38 (d,  $J = 8.0$  Hz, 1H), 7.11-7.06 (m, 1H), 7.04-7.00 (m, 1H), 6.90 (d,  $J = 8.5$  Hz, 2H), 4.11 (t,  $J = 6.5$  Hz, 2H), 3.10 (t,  $J = 6.5$  Hz, 2H).  $^{13}\text{C}$  NMR (125 MHz, DMSO)  $\delta$  160.7, 157.8, 137.4, 128.6, 125.7, 124.4, 122.4, 122.0, 119.5, 118.8, 117.9, 116.5, 116.0, 112.3, 108.9, 41.6, 19.6. HRMS (ESI):  $m/z$  calcd for  $(C_{19}H_{15}N_3OS+H)^+$ : 334.1009; found: 334.1008.

**8-chloro-1-(4-hydroxyphenyl)-2,5,6,11-tetrahydro-3H-imidazo [1',5':1,2] pyrido[3,4-b] indole-3-thione (3o)**

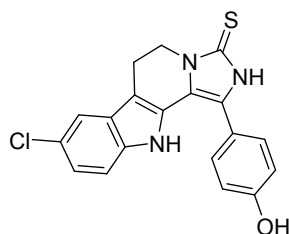

White solid, m.p.  $>250^{\circ}\text{C}$ ,  $^1\text{H}$  NMR (500 MHz, DMSO)  $\delta$  12.58 (s, 1H), 10.74 (s, 1H), 9.97 (s, 1H), 7.57 (d,  $J = 1.5$  Hz, 1H), 7.44 (d,  $J = 8.5$  Hz, 2H), 7.38 (d,  $J = 8.5$  Hz, 1H), 7.07 (dd,  $J = 8.5, 2.0$  Hz, 1H), 6.92 (d,  $J = 8.5$  Hz, 2H), 4.09 (t,  $J = 6.5$  Hz, 2H), 3.09 (t,  $J = 6.5$  Hz, 2H).  $^{13}\text{C}$  NMR (125 MHz, DMSO)  $\delta$  160.9, 158.1, 135.8, 128.7, 126.9, 126.1, 124.1, 123.2, 121.8, 118.5, 117.2, 116.1, 116.0, 113.7, 108.5, 41.6, 19.5. HRMS (ESI):  $m/z$  calcd for  $(C_{19}H_{14}ClN_3OS+H)^+$ : 368.0619; found: 368.0619.

**1-(4-(dimethylamino) phenyl)-2,5,6,11-tetrahydro-3H-imidazo [1',5':1,2] pyrido[3,4-b] indole-3-thione (3p)**

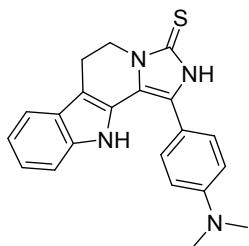

Light green solid, m.p. >250°C,  $^1\text{H}$  NMR (500 MHz, DMSO)  $\delta$  12.49 (s, 1H), 10.57 (s, 1H), 7.51-7.48 (m, 3H), 7.39 (d,  $J$  = 8.0 Hz, 1H), 7.08 (t,  $J$  = 7.5 Hz, 1H), 7.02 (t,  $J$  = 7.5 Hz, 1H), 6.85 (d,  $J$  = 8.5 Hz, 2H), 4.10 (t,  $J$  = 6.5 Hz, 2H), 3.10 (t,  $J$  = 6.5 Hz, 2H), 2.99 (s, 6H).  $^{13}\text{C}$  NMR (125 MHz, DMSO)  $\delta$  160.6, 150.3, 137.3, 127.8, 125.7, 124.7, 122.9, 121.9, 119.4, 117.8, 116.0, 115.4, 112.5, 112.3, 108.6, 41.7, 39.9, 19.6. HRMS (ESI):  $m/z$  calcd for  $(\text{C}_{21}\text{H}_{20}\text{N}_4\text{S}+\text{H})^+$ : 361.1481; found: 361.1482.

**8-chloro-1-(4-(dimethylamino) phenyl)-2,5,6,11-tetrahydro-3H-imidazo [1',5':1,2] pyrido[3,4-b] indole-3-thione (3q)**

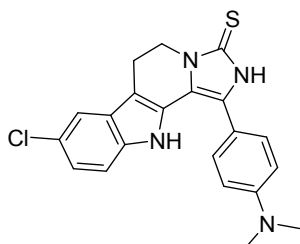

Green solid, m.p. >250°C,  $^1\text{H}$  NMR (500 MHz, DMSO)  $\delta$  12.55 (s, 1H), 10.77 (s, 1H), 7.57 (d,  $J$  = 2.0 Hz, 1H), 7.46 (d,  $J$  = 8.5 Hz, 2H), 7.38 (d,  $J$  = 8.5 Hz, 1H), 7.06 (dd,  $J$  = 8.5, 2.0 Hz, 1H), 6.85 (d,  $J$  = 8.5 Hz, 2H), 4.09 (t,  $J$  = 6.5 Hz, 2H), 3.09 (t,  $J$  = 6.5 Hz, 2H), 2.99 (s, 6H).  $^{13}\text{C}$  NMR (125 MHz, DMSO)  $\delta$  160.8, 150.3, 135.8, 127.9, 126.9, 126.4, 124.1, 123.6, 121.7, 117.1, 115.5, 115.2, 113.7, 112.5, 108.2, 41.6, 39.9, 19.5. HRMS (ESI):  $m/z$  calcd for  $(\text{C}_{21}\text{H}_{19}\text{ClN}_4\text{S}+\text{H})^+$ : 395.1092; found: 395.1090.

**4-(3-thioxo-2,5,6,11-tetrahydro-3H-imidazo [1',5':1,2] pyrido[3,4-b] indol-1-yl) benzonitrile (3r)**

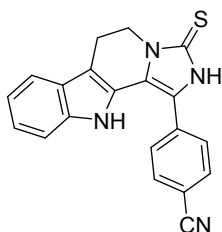

Yellow solid, m.p. >250°C,  $^1\text{H}$  NMR (500 MHz, DMSO)  $\delta$  12.85 (s, 1H), 10.80 (s, 1H), 7.96 (d,  $J$  = 8.0 Hz, 2H), 7.84 (d,  $J$  = 8.0 Hz, 2H), 7.56 (d,  $J$  = 7.5 Hz, 1H),

7.38(d,  $J = 8.0$  Hz, 1H), 7.14 (t,  $J = 7.5$  Hz, 1H), 7.06 (t,  $J = 7.5$  Hz, 1H), 4.14 (t,  $J = 6.5$  Hz, 1H), 3.15 (t,  $J = 6.5$  Hz, 1H).  $^{13}\text{C}$  NMR (125 MHz, DMSO)  $\delta$  162.1, 137.6, 133.0, 132.5, 127.5, 125.5, 123.6, 122.7, 120.1, 119.7, 119.4, 118.7, 118.3, 112.2, 110.9, 110.2, 41.6, 19.5. HRMS (ESI):  $m/z$  calcd for  $(\text{C}_{20}\text{H}_{14}\text{N}_4\text{S}+\text{H})^+$ : 343.1012; found: 343.1010.

**Methyl (R)-3-thioxo-1-(p-tolyl)-2, 5, 6, 11-tetrahydro-3H-imidazo [1', 5':1, 2] pyrido[3,4-b] indole-5-carboxylate (3s)**

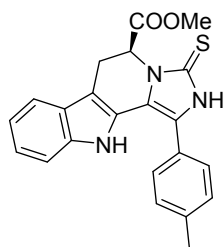

Yellow solid, m.p.  $>250^\circ\text{C}$ ,  $^1\text{H}$  NMR (500 MHz, DMSO)  $\delta$  12.81 (s, 1H), 10.69 (s, 1H), 7.58 (d,  $J = 8.1$  Hz, 2H), 7.53 (d,  $J = 7.8$  Hz, 1H), 7.37 (t,  $J = 7.8$  Hz, 3H), 7.10 (t,  $J = 7.5$  Hz, 1H), 7.03 (t,  $J = 7.4$  Hz, 1H), 5.64 (d,  $J = 6.9$  Hz, 1H), 3.62 (d,  $J = 16.2$  Hz, 1H), 3.56 (s, 3H), 3.44 (dd,  $J = 16.4, 7.4$  Hz, 1H), 2.40 (s, 3H).  $^{13}\text{C}$  NMR (125 MHz, DMSO)  $\delta$  170.3, 163.0, 138.6, 137.9, 130.3, 127.4, 122.9, 122.8, 120.2, 118.5, 117.2, 112.8, 106.8, 53.8, 53.1, 23.8, 21.4. HRMS (ESI):  $m/z$  calcd for  $(\text{C}_{22}\text{H}_{19}\text{N}_3\text{O}_2\text{S}+\text{H})^+$ : 390.1271; found: 390.1275.

**Methyl (R)-3-thioxo-1-(4-(trifluoromethyl) phenyl)-2, 5, 6, 11-tetrahydro-3H-imidazo [1', 5':1, 2] pyrido[3,4-b] indole-5-carboxylate (3t)**

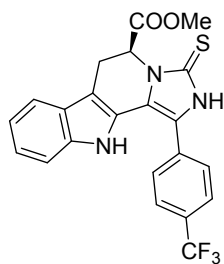

Yellow solid, m.p.  $>250^\circ\text{C}$ ,  $^1\text{H}$  NMR (500 MHz, DMSO)  $\delta$  13.08 (s, 1H), 10.91 (s, 1H), 7.90 (s, 4H), 7.57 (d,  $J = 8.5$  Hz, 1H), 7.36 (d,  $J = 8.0$  Hz, 1H), 7.16-7.11 (m, 1H), 7.07-7.03 (m, 1H), 5.66 (d,  $J = 6.5$  Hz, 1H), 3.66-3.62 (m, 1H), 3.56 (s, 3H), 3.47 (dd,  $J = 16.5, 7.5$  Hz, 1H).  $^{13}\text{C}$  NMR (125 MHz, DMSO)  $\delta$  169.7, 163.2, 137.6, 131.9, 128.4 (q,  $J = 31.25$  Hz), 127.6, 126.2 (q,  $J = 2.5$  Hz), 125.6, 124.2 (d,  $J =$

271.25 Hz), 123.6, 122.8, 120.6, 119.9, 118.4, 118.3, 112.3, 107.4, 53.3, 52.7, 20.8.  
HRMS (ESI):  $m/z$  calcd for  $(C_{22}H_{16}F_3N_3O_2S+H)^+$ : 444.0988; found: 444.0991.

**Methyl (R)-1-(4-cyanophenyl)-3-thioxo-2, 5, 6, 11-tetrahydro-3H-imidazo [1', 5':1, 2] pyrido[3,4-b] indole-5-carboxylate (3u)**

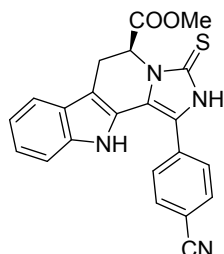

Yellow solid, m.p. >250°C,  $^1H$  NMR (500 MHz, DMSO)  $\delta$  13.02 (s, 1H), 10.86 (s, 1H), 8.00-7.98 (m, 2H), 7.87-7.85 (m, 2H), 7.56 (d,  $J$  = 8.0 Hz, 1H), 7.36 (d,  $J$  = 8.0Hz, 1H), 7.16-7.13 (m, 1H), 7.07-7.04 (m, 1H), 5.65 (d,  $J$  = 6.5 Hz, 1H), 3.66-3.63 (m, 1H), 3.56 (s, 3H), 3.47 (dd,  $J$  = 16.5, 7.5 Hz, 1H).  $^{13}C$  NMR (125 MHz, DMSO)  $\delta$  169.6, 163.4, 137.6, 133.0, 132.3, 127.5, 125.5, 123.5, 122.9, 120.4, 119.9, 118.8, 118.7, 118.3, 112.2, 110.4, 107.7, 53.3, 52.6, 23.2. HRMS (ESI):  $m/z$  calcd for  $(C_{22}H_{16}N_4O_2S+H)^+$ : 401.1067; found: 401.1064.

**Methyl (R)-1-(4-hydroxyphenyl)-3-thioxo-2, 5, 6, 11-tetrahydro-3H-imidazo [1', 5':1, 2] pyrido[3,4-b] indole-5-carboxylate (3v)**

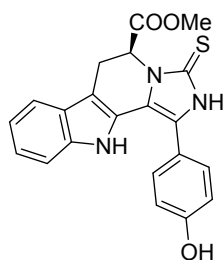

Yellow solid, m.p. >250°C,  $^1H$  NMR (500 MHz, DMSO)  $\delta$  12.63 (s, 1H), 10.57 (s, 1H), 9.80 (s, 1H), 7.51-7.47 (m, 3H), 7.37 (d,  $J$  = 8.5 Hz, 1H), 7.10-1.07 (m, 1H), 7.03-7.00 (m, 1H), 6.93-6.91 (m, 2H), 5.62 (d,  $J$  = 6.5 Hz, 1H), 3.61-3.58 (m, 1H), 3.56 (s, 3H), 3.41 (dd,  $J$  = 16.5, 7.5 Hz, 1H).  $^{13}C$  NMR (125 MHz, DMSO)  $\delta$  169.8, 162.2, 157.9, 137.3, 128.6, 124.3, 122.6, 122.1, 119.6, 118.5, 117.8, 116.0, 115.9, 112.2, 105.7, 54.8, 53.3, 52.5, 23.2. HRMS (ESI):  $m/z$  calcd for  $(C_{21}H_{17}N_3O_3S+H)^+$ : 392.1063; found: 392.1067.

**1-(Tert-butyl)-2, 5, 6, 11-tetrahydro-3H-imidazo [1', 5':1, 2] pyrido[3,4-b] indole-3-thione (3w)**

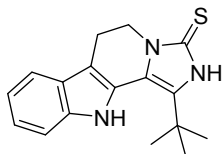

Yellow solid, m.p. >250°C,  $^1\text{H}$  NMR (500 MHz, DMSO)  $\delta$  11.94 (s, 1H), 10.47 (s, 1H), 7.52 (t,  $J$  = 6.9 Hz, 2H), 7.12 (t,  $J$  = 7.6 Hz, 1H), 7.04 (t,  $J$  = 7.5 Hz, 1H), 4.04 (t,  $J$  = 6.5 Hz, 2H), 2.99 (t,  $J$  = 6.5 Hz, 2H), 1.46 (s, 9H).  $^{13}\text{C}$  NMR (125 MHz, DMSO)  $\delta$  159.9, 137.9, 132.4, 126.1, 125.3, 122.4, 120.0, 118.4, 116.8, 112.7, 110.1, 42.3, 31.8, 30.6, 20.2. HRMS (ESI):  $m/z$  calcd for  $(\text{C}_{17}\text{H}_{19}\text{N}_3\text{S}+\text{H})^+$ : 298.1372; found: 298.1376.

**1-(thiophen-2-yl)-2, 5,6,11-tetrahydro-3H-imidazo [1', 5':1, 2] pyrido[3,4-b] indole-3-thione (3x)**

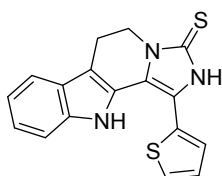

Grey solid, m.p. >250°C,  $^1\text{H}$  NMR (500 MHz, DMSO)  $\delta$  12.74 (s, 1H), 10.71 (s, 1H), 7.74-7.67 (m, 1H), 7.58-7.49 (m, 2H), 7.43 (d,  $J$  = 8.1 Hz, 1H), 7.23 (dd,  $J$  = 5.0, 3.7 Hz, 1H), 7.12 (dd,  $J$  = 11.6, 4.3 Hz, 1H), 7.05 (t,  $J$  = 7.4 Hz, 1H), 4.13 (t,  $J$  = 6.7 Hz, 2H), 3.11 (t,  $J$  = 6.7 Hz, 2H).  $^{13}\text{C}$  NMR (125 MHz, DMSO)  $\delta$  162.0, 138.1, 129.5, 128.5, 127.8, 127.3, 126.1, 124.2, 123.0, 120.1, 118.6, 116.2, 112.8, 110.6, 42.1, 20.1. HRMS (ESI):  $m/z$  calcd for  $(\text{C}_{17}\text{H}_{13}\text{N}_3\text{S}_2+\text{H})^+$ : 324.0624; found: 324.0624.

## General Procedure for the biological evaluation of compound 3

### Cell culture

The human umbilical vein/vascular cell line (HUVEC), the HeLa cell line and the HCT116 cell line were purchased from ATCC. Briefly, the cells were cultured in Dulbecco's modified Eagle medium (DMEM, Thermo Fisher Scientific) for HUVEC, or Eagle's Minimal Essential Medium (EMEM, Thermo Fisher Scientific) for HeLa cells, or McCoy's 5A Medium (Thermo Fisher Scientific), for HCT116 cells supplemented with 10% heat-inactivated fetal bovine serum (Thermo Fisher Scientific), penicillin (100 U/mL, Thermo Fisher Scientific), and streptomycin (100 U/mL, Thermo Fisher Scientific). The cultures were maintained at 37 °C in a 95% humidified atmosphere with 5% CO<sub>2</sub>.

### Cytotoxicity assay for Probe

HeLa cells were seeded in 96-well plates at a density of  $5 \times 10^3$  cells/well at 37 °C in a 95% humidified atmosphere with 5% CO<sub>2</sub> for 24 h. After washing with PBS twice, **3t/3q** with concentration of 1 μM, 5 μM, 60 μM, 80 μM, and 100 μM were added to the cells, which were allowed an incubation period of 24 h. After introducing 10 μL of CCK8 solution for 1 h, the absorption at 450 nm was measured by Microplate Spectrophotometer (MD I3X). Each experiment was repeated three times, and the average values were taken in analyses.

### Confocal fluorescence imaging

For confocal microscopy imaging of subcellular distribution of **3t**, **3q** or **3u** in living cells, HeLa or HUVEC cells were incubated with 1 μM probe for 30 min at 37 °C and followed by staining with of ER-Tracker(1 μM)/Mito-Tracker(0.5 μM)/Lyso-Tracker (1 μM) for 30min, then washed with PBS (pH 7.4) and replaced with fresh medium. For evaluate the photo-stability of **3t**, **3q** or **3u** in the live cells, the HeLa cells were incubated with **3t** (1 μM) or **3q** (1 μM) or **3u** (1 μM) with increasing number of scans (irradiation time: 5.36 s/scan). The laser power used for **3t**, **3q** and **3u** was 0.1%. For visualization of **3t** in HeLa cells native or upon ER stress, HeLa cells were incubated with **3t** for 30 min at 37 °C, and then washed with PBS (pH 7.4) followed by tunicamycin (TM, 10 μM) treatment. For visualization of **3t** in HeLa

cells during apoptosis, HeLa cells were pre-treated with 100 ng/ml TNF $\alpha$  for 72 h, and then incubated with 1  $\mu$ M **3t** or ER-Tracker Red (1  $\mu$ M) for 30 min. After that, cells were washed with PBS (pH 7.4) and replaced with fresh medium. For analyze the sensitivity of **3t** in HeLa cells, cells were incubated with **3t** (1  $\mu$ M) and ER-Tracker (1  $\mu$ M) for 30 min at 37 °C, then the images were obtained by confocal microscopy with 0.1%, 1%, 10%, 25%, 50% and 75% laser power. For analyze the efficiency of **3t** in staining ER at different concentrations. HeLa cells were incubated with **3t**, ER-Tracker Red or ER-Tracker Blue at the concentration of 250 nM, 500 nM and 1  $\mu$ M, respectively, then washed with PBS (pH 7.4) and replaced with fresh medium. The images were obtained by confocal microscopy with 20% laser power. The fluorescence of **3t**, **3q** or **3u** was monitored at  $\lambda_{em}$ =440-480nm ( $\lambda_{ex}$ =405nm). Fluorescent signal from ER-Tracker red/Mito-Tracker/Lyso-Tracker was obtained at  $\lambda_{em}$ =600-650nm ( $\lambda_{ex}$ =543nm), fluorescent signal from ER-Tracker Blue was obtained at  $\lambda_{em}$ =430-530 nm ( $\lambda_{ex}$ =405nm). The fluorescence was obtained by fluoview FV1000 laser scanning confocal microscope (Olympus). Digital images were captured using the FV10-ASW 3.0 viewer software (Olympus), and performed using a 60 $\times$  objective in at least four fields of view randomly selected from each culture dish. At least 3 independent experiments were counted. The fluorescence density was analyzed using Image J software (NIH, Bethesda, MD, USA).

## Supplementary Tables and Figures

**Table S1.** Optimization of reaction conditions <sup>a</sup>

Reaction scheme: 1a (tryptamine derivative) + 2a (phenylglyoxal) + KSCN  $\xrightarrow{\text{conditions}}$  3a (indole-tryptamine-thiazolidine derivative).

| Entry | Additive(equiv.)                           | Solvent            | T/ °C | Yield/% <sup>b</sup> |
|-------|--------------------------------------------|--------------------|-------|----------------------|
| 1     | /                                          | CH <sub>3</sub> CN | 25    | trace                |
| 2     | Conc. HCl (1.0)                            | CH <sub>3</sub> CN | 25    | 22                   |
| 3     | HOAc (1.0)                                 | CH <sub>3</sub> CN | 25    | 46                   |
| 4     | Conc. H <sub>2</sub> SO <sub>4</sub> (1.0) | CH <sub>3</sub> CN | 25    | 67                   |
| 5     | MeSO <sub>3</sub> H (1.0)                  | CH <sub>3</sub> CN | 25    | 52                   |
| 6     | TFA (1.0)                                  | CH <sub>3</sub> CN | 25    | 69                   |
| 7     | TFA (1.0)                                  | EtOH               | 25    | 43                   |
| 8     | TFA (1.0)                                  | THF                | 25    | 62                   |
| 9     | TFA (1.0)                                  | DCE                | 25    | 51                   |
| 10    | TFA (1.0)                                  | DMSO               | 25    | 13                   |
| 11    | TFA (1.0)                                  | DMF                | 25    | 25                   |
| 12    | TFA (1.0)                                  | CH <sub>3</sub> CN | 40    | 80                   |
| 13    | TFA (1.0)                                  | CH <sub>3</sub> CN | 80    | 70                   |
| 14    | TFA (0.5)                                  | CH <sub>3</sub> CN | 25    | 64                   |
| 15    | TFA (1.5)                                  | CH <sub>3</sub> CN | 25    | 71                   |

<sup>a</sup>.Reaction conditions: 0.3 mmol **1a**, 1.0 equiv **2a**, 2.0 equiv KSCN, solvent (2 mL) at 40 °C. <sup>b</sup>. Yield of isolated products.



**Table S2.** Photo-physical properties of Carboline-Fluor<sup>a</sup>

| <b>Compd.</b> | <b><math>\lambda_{\text{abs}}/\text{nm}</math></b> | <b><math>\lambda_{\text{ex}}/\text{nm}</math></b> | <b><math>\lambda_{\text{em}}/\text{nm}</math></b> | <b>Stokes shift/<math>\text{cm}^{-1}</math></b> | <b><math>\Phi_{\text{F}}</math></b> |
|---------------|----------------------------------------------------|---------------------------------------------------|---------------------------------------------------|-------------------------------------------------|-------------------------------------|
| <b>3a</b>     | 350                                                | 350                                               | 412                                               | 4300                                            | 0.09                                |
| <b>3b</b>     | 353                                                | 360                                               | 418                                               | 3854                                            | 0.12                                |
| <b>3c</b>     | 350                                                | 350                                               | 414                                               | 4417                                            | 0.26                                |
| <b>3d</b>     | 327                                                | 328                                               | 480                                               | 9654                                            | 0.05                                |
| <b>3e</b>     | 368                                                | 368                                               | 442                                               | 4549                                            | 0.14                                |
| <b>3f</b>     | 371                                                | 370                                               | 448                                               | 4706                                            | 0.23                                |
| <b>3g</b>     | 365                                                | 364                                               | 438                                               | 4641                                            | 0.52                                |
| <b>3h</b>     | 356                                                | 358                                               | 428                                               | 4568                                            | 0.08                                |
| <b>3i</b>     | 340                                                | 346                                               | 410                                               | 4511                                            | 0.08                                |
| <b>3j</b>     | 347                                                | 346                                               | 410                                               | 4511                                            | 0.19                                |
| <b>3k</b>     | 352                                                | 352                                               | 412                                               | 4137                                            | 0.20                                |
| <b>3l</b>     | 352                                                | 354                                               | 418                                               | 4325                                            | 0.15                                |
| <b>3m</b>     | 352                                                | 356                                               | 422                                               | 4393                                            | 0.33                                |
| <b>3n</b>     | 336                                                | 338                                               | 410                                               | 5196                                            | 0.61                                |
| <b>3o</b>     | 353                                                | 356                                               | 418                                               | 4166                                            | 0.12                                |
| <b>3p</b>     | 354                                                | 360                                               | 426                                               | 4304                                            | 0.32                                |
| <b>3q</b>     | 359                                                | 366                                               | 434                                               | 4281                                            | 0.66                                |
| <b>3r</b>     | 396                                                | 389                                               | 504                                               | 5866                                            | 0.11                                |
| <b>3s</b>     | 350                                                | 354                                               | 412                                               | 3977                                            | 0.06                                |
| <b>3t</b>     | 368                                                | 370                                               | 444                                               | 4505                                            | 0.29                                |
| <b>3u</b>     | 380                                                | 397                                               | 503                                               | 5308                                            | 0.16                                |
| <b>3v</b>     | 351                                                | 351                                               | 409                                               | 4040                                            | 0.07                                |
| <b>3w</b>     | 324                                                | 320                                               | 372                                               | 4368                                            | 0.11                                |
| <b>3x</b>     | 352                                                | 356                                               | 428                                               | 4725                                            | 0.09                                |

<sup>a</sup>.Photo-physical properties in EtOH at 10.0  $\mu\text{M}$

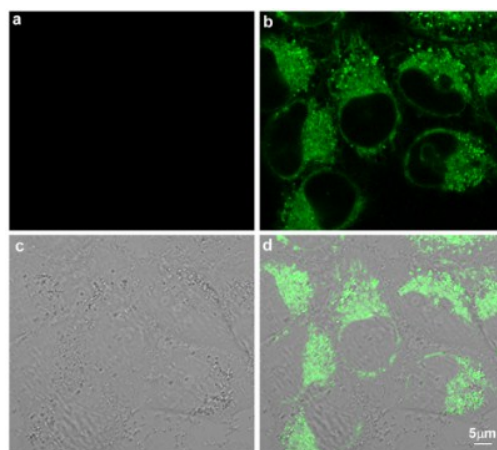

**Fig S1.** Confocal fluorescence images of HeLa cells cultured with **3t** in EMEM medium ( $\lambda_{\text{ex}} = 405 \text{ nm}$ ,  $\lambda_{\text{em}} = 440\text{-}480 \text{ nm}$ ). (a) **3t** without HeLa cells; (b) **3t** with HeLa cells, the fluorescence of **3t** was indicated as green color; (c) bright field image; (d) merged image of b and c. Scale bar=5  $\mu\text{m}$ .

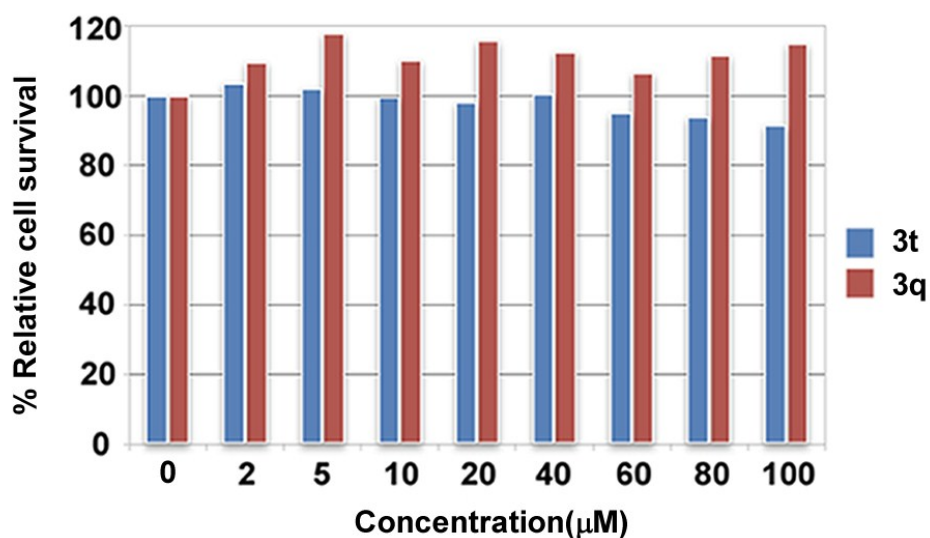

**Figure S2** Cytotoxicity of **3t** and **3q** was assessed in HeLa by CCK8 assays. **3t** with concentration of 2  $\mu\text{M}$ , 5  $\mu\text{M}$ , 10  $\mu\text{M}$ , 20  $\mu\text{M}$ , 40  $\mu\text{M}$ , 60  $\mu\text{M}$ , 80  $\mu\text{M}$  and 100  $\mu\text{M}$  were added to cells, and incubated for of 24 h. After introducing CCK8 (10  $\mu\text{L}$ ) solution at 37°C in a 95% humidified atmosphere with 5%  $\text{CO}_2$  for 1 h, the absorption at 450 nm was measured by Microplate Spectrophotometer (MD I3X).

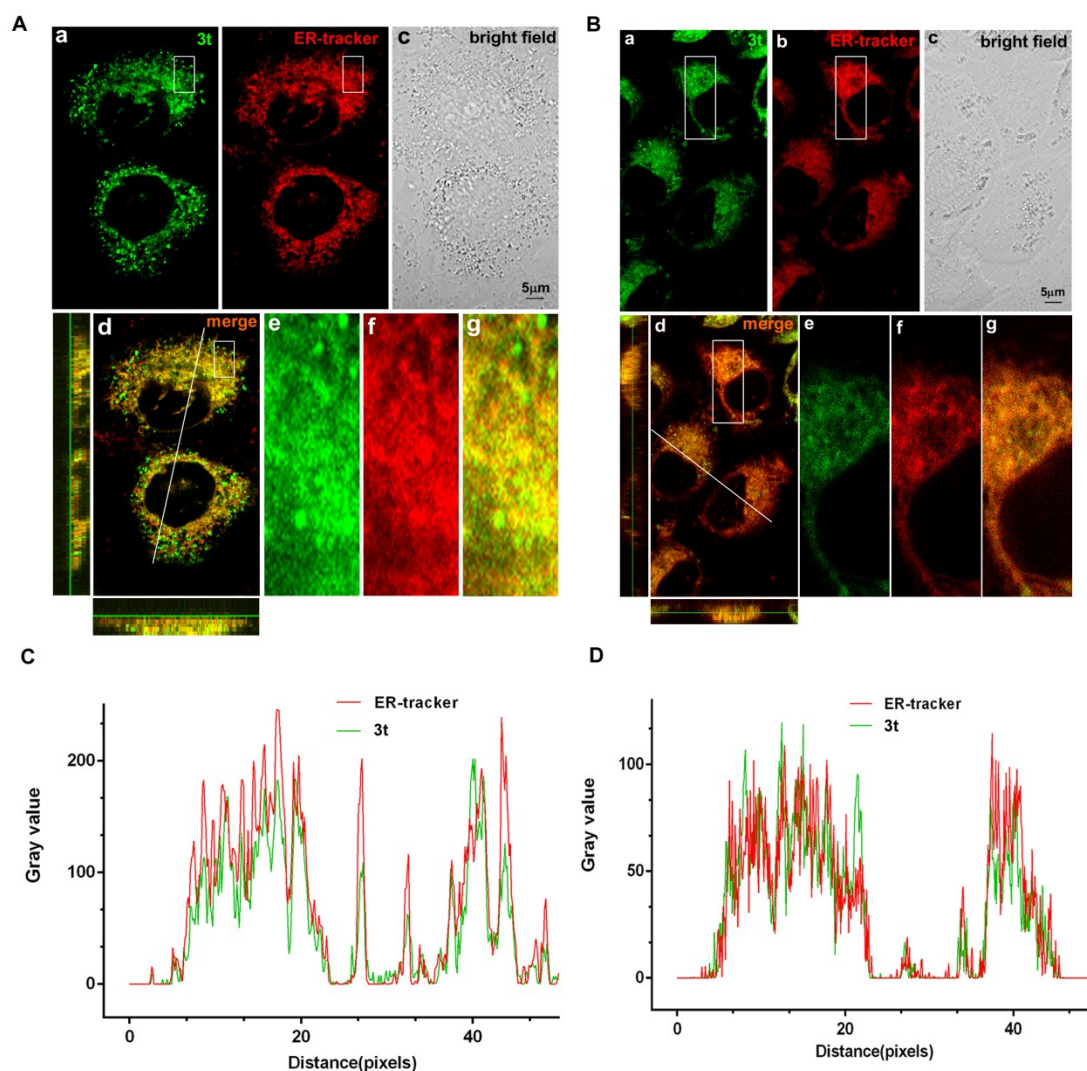

**Figure S3** Confocal microscopic images of subcellular localization of **3t** in HUVEC cells. (A, B) Cells were incubated with **3t** (A: 1 μM, B: 10 μM) for 30 min at 37 °C and subsequently stained with 1 μM of ER-tracker, then washed with PBS (pH 7.4). a) Green fluorescent of **3t**; b) Red fluorescent of ER-tracker; c) Bright field; d) Merge of a and b, orthogonal projection onto the x-z and y-z planes as shown to confirm the co-localization of **3t** and ER-tracker Red; e, f, g) themagnification of the pane in the a, b, d, respectively. (C, D) Intensity profile of regions of interest across HUVEC cells. The **3t** fluorescence was monitored at  $\lambda_{em}=440-480$  nm ( $\lambda_{ex}=405$  nm). Fluorescent signal from ER-trackers were obtained at  $\lambda_{em}= 600-650$  nm ( $\lambda_{ex}=543$  nm). Scale bar=5 μm.

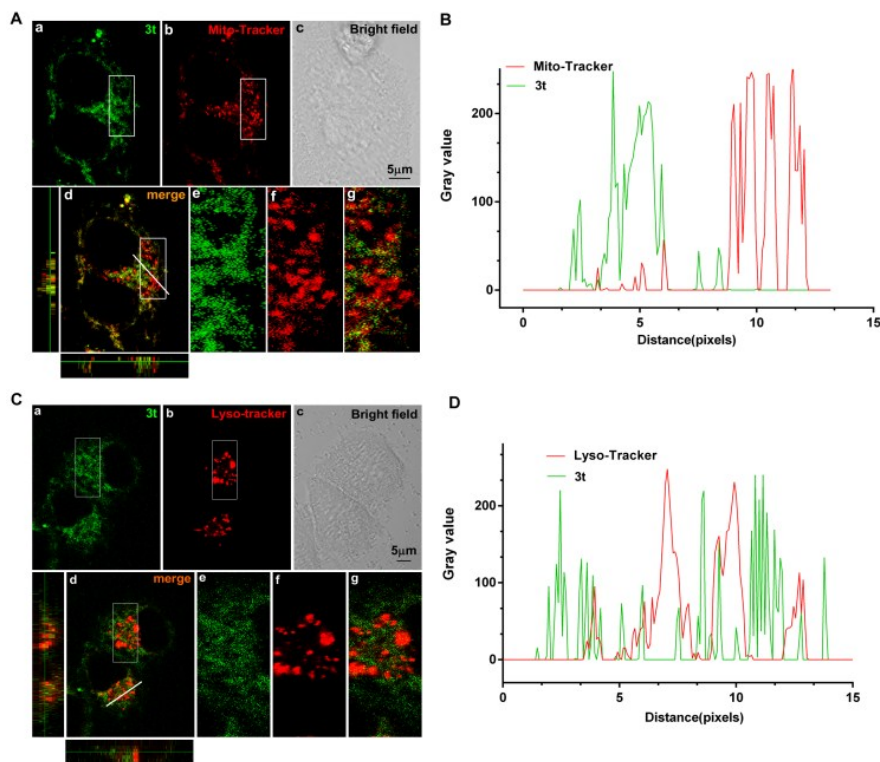

**Fig S4.** Confocal microscopic images of subcellular localization of **3t** in HeLa cells. **A, C)** Cells were incubated with 1  $\mu$ M **3t** for 30 min at 37  $^{\circ}$ C and subsequently stained with 0.5  $\mu$ M **MTR** (A) or 1  $\mu$ M of **LTR** (C). a) Green fluorescent of **3t**; b) Red fluorescent of Mito-Tracker or Lyso-Tracker; c) Bright field; d) Merge of a and b, orthogonal projection onto the x-z and y-z planes as shown to confirm the co-localization of **3t** and **MTR** (A) or **LTR** (C); e, f, g) the magnification of the pane in the a, b, d, respectively. **B, D)** Intensity profile of regions of interest across HeLa cells. The **3t** fluorescence was monitored at  $\lambda_{em}$ =440-480 nm ( $\lambda_{ex}$ =405 nm). Fluorescent signal from Mito-Tracker or Lyso-Tracker were obtained at  $\lambda_{em}$ = 600-650 nm ( $\lambda_{ex}$ =543 nm). Scale bar=5  $\mu$ m.

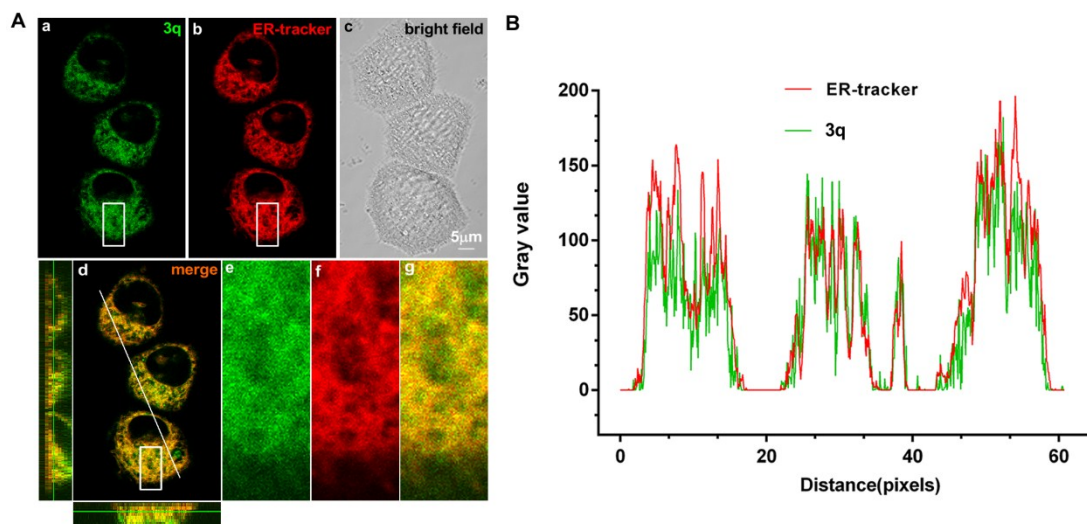

**Figure S5** Confocal microscopic images of subcellular localization of **3q** in HeLa cells. (A) Cells were incubated with 1 μM **3q** for 30 min at 37 °C and subsequently stained with 1 μM of ER-tracker. a) Green fluorescent of **3q**; b) Red fluorescent of ER-tracker; c) Bright field; d) Merge of a and b, orthogonal projection onto the x-z and y-z planes as shown to confirm the co-localization of **3q** and ER-tracker Red; e, f, g) themagnification of the pane in the a, b, d, respectively. (B) Intensity profile of regions of interest across HeLacells. The **3q** fluorescence was monitored at  $\lambda_{em}$ =440-480 nm ( $\lambda_{ex}$ =405 nm). Fluorescent signal from ER-trackers were obtained at  $\lambda_{em}$ =600-650 nm ( $\lambda_{ex}$ =543 nm). Scale bar=5 μm.

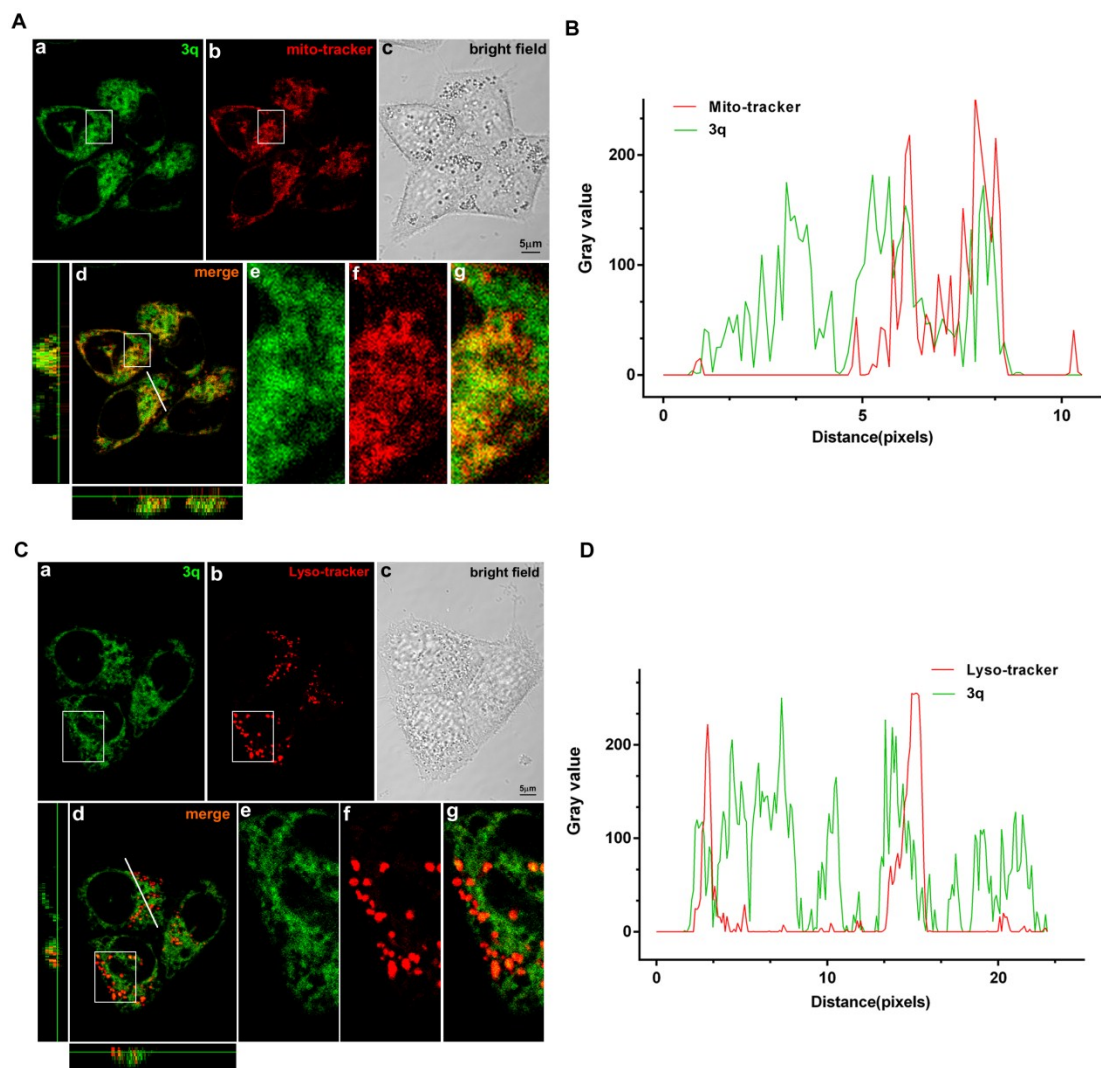

**Figure S6** Confocal microscopic images of subcellular localization of **3q** in HeLa cells. (A, C) Cells were incubated with 1  $\mu$ M **3q** for 30 min at 37  $^{\circ}$ C and subsequently stained with 0.5  $\mu$ M Mito-tracker (A) or 1  $\mu$ M of Lyso-tracker (C). a) Green fluorescent of **3q**; b) Red fluorescent of Mito-tracker or Lyso-tracker; c) Bright field; d) Merge of a and b, orthogonal projection onto the x-z and y-z planes as shown to confirm the co-localization of **3q** and Mito-tracker (A) or Lyso-tracker (C); e, f, g) themagnification of the pane in the a, b, d, respectively. (B, D) Intensity profile of regions of interest across HeLa cells. The **3q** fluorescence was monitored at  $\lambda_{em}$ =440-480 nm ( $\lambda_{ex}$ =405 nm). Fluorescent signal from Mito-tracker or Lyso-tracker were obtained at  $\lambda_{em}$ = 600-650 nm ( $\lambda_{ex}$ =543 nm). Scale bar=5  $\mu$ m.



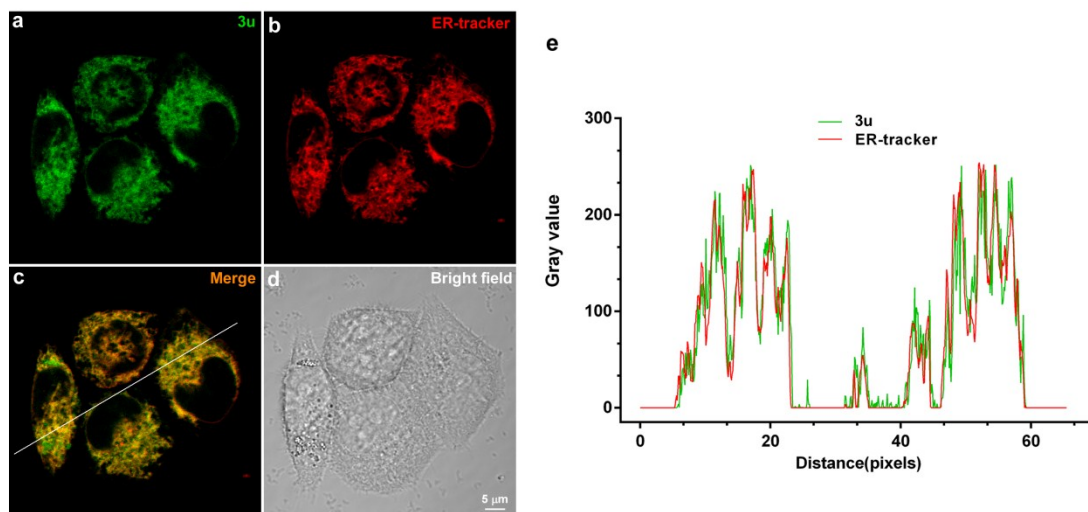

**Figure S7** Confocal microscopic images of subcellular localization of **3u** in HeLa cells. (A) Cells were incubated with 1 μM **3u** for 30 min at 37 °C and subsequently stained with 1 μM of ER-tracker, then washed with PBS (pH 7.4). a) green fluorescent of; b) red fluorescent of ER-tracker; c) bright field; d) merge of a and b, (B) Intensity profile of regions of interest across HeLa cells. The **3u** fluorescence was monitored at  $\lambda_{em}=440-480$  nm ( $\lambda_{ex}=405$  nm). Fluorescent signal from ER-tracker was obtained at  $\lambda_{em}=600-650$  nm ( $\lambda_{ex}=543$  nm). Scale bar=5 μm.

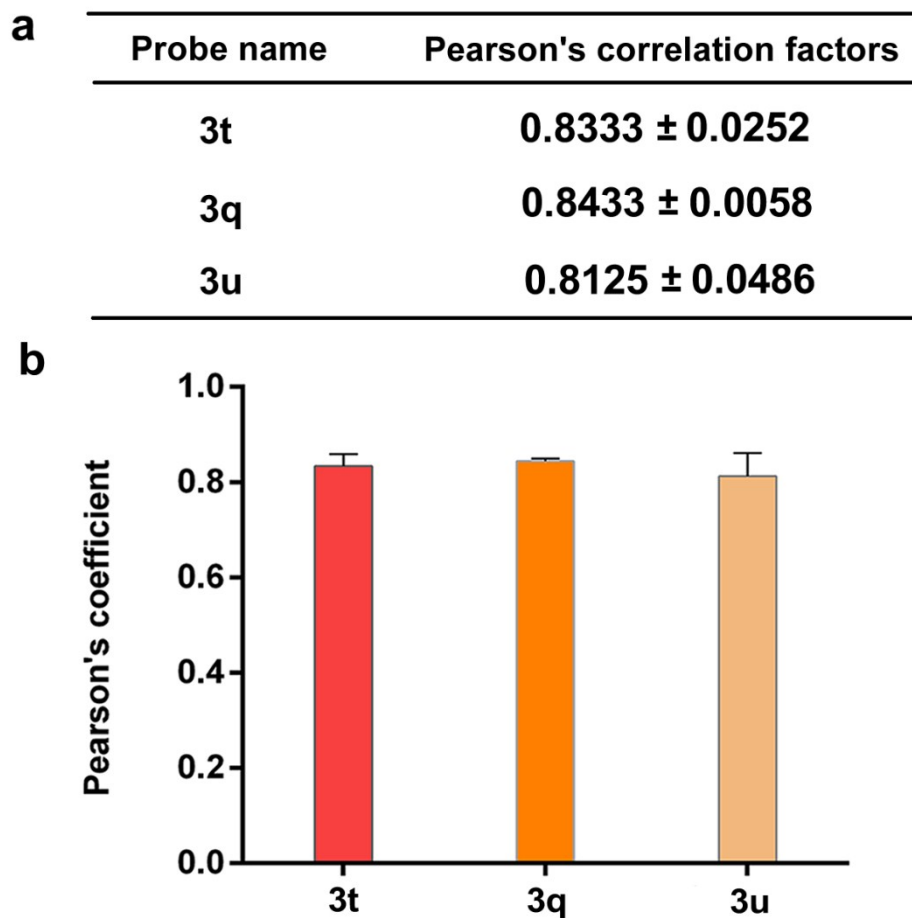

**Figure S8** Quantification of colocalization analysis. (A) The colocalization of **3t**, **3q**, **3u** with ER was quantified with Pearson's coefficient calculated using the Image J software and averaged across 4 separate fields of cells. (B) Data were expressed as mean  $\pm$  S. E. M,  $n=4$ .



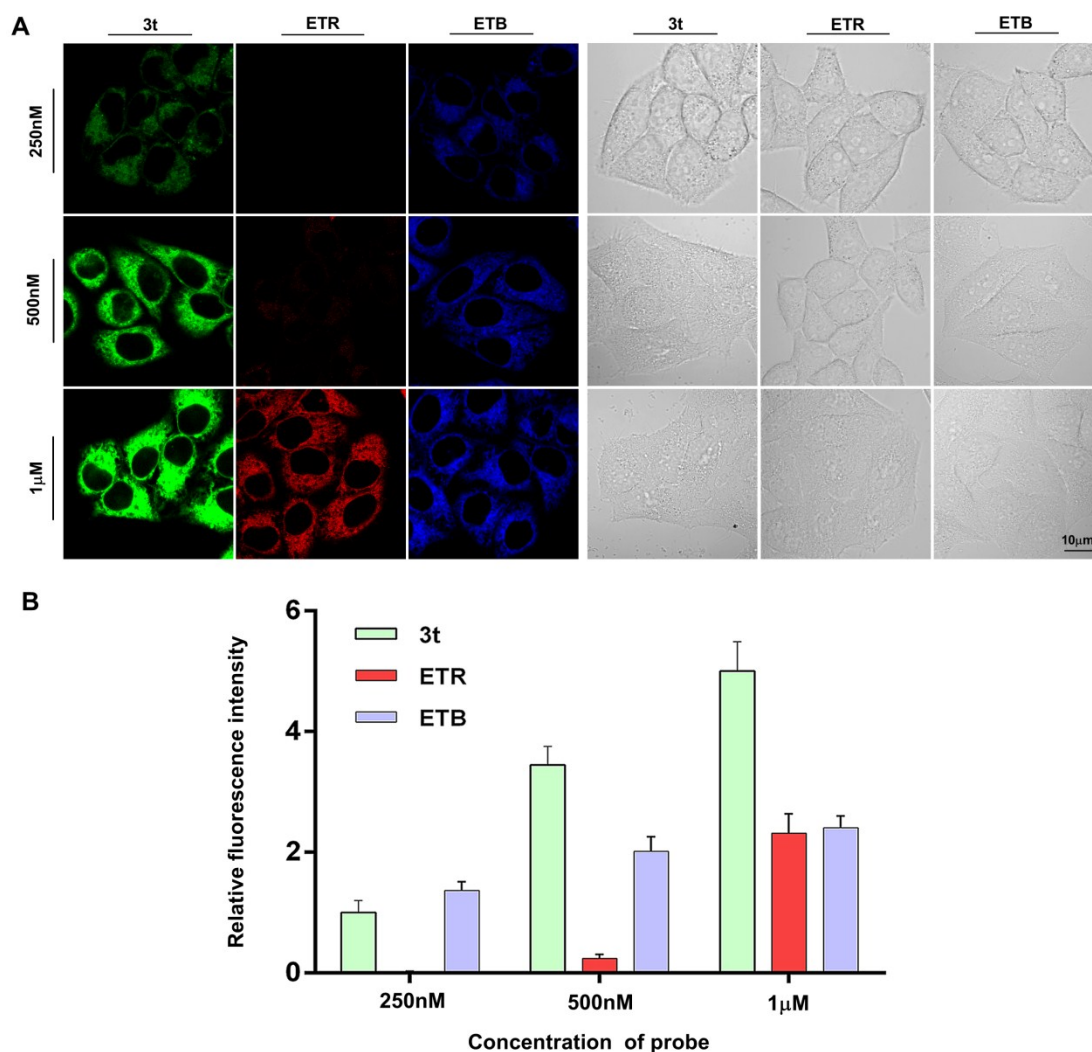

**Figure S9.** The efficiency of **3t** in staining ER at different concentrations. (A) HeLa cells were incubated with **3t**, **ETR** or **ETB** at the concentration of 250 nM, 500 nM and 1  $\mu$ M, respectively. The images were obtained by confocal microscopy with 20% laser power. The fluorescence of **3t** and **ETB** was monitored at 440-480 nm ( $\lambda_{\text{ex}}$ =405 nm), and **ETR** was monitored at 600-650 nm ( $\lambda_{\text{ex}}$ = 543 nm). Scale bar=10  $\mu$ m. (B) Quantification of image data. The fluorescence was normalized to the group of **3t** at 250 nM. Data were expressed as mean  $\pm$  S.E.M., a minimum of 3 images were quantified and averaged.

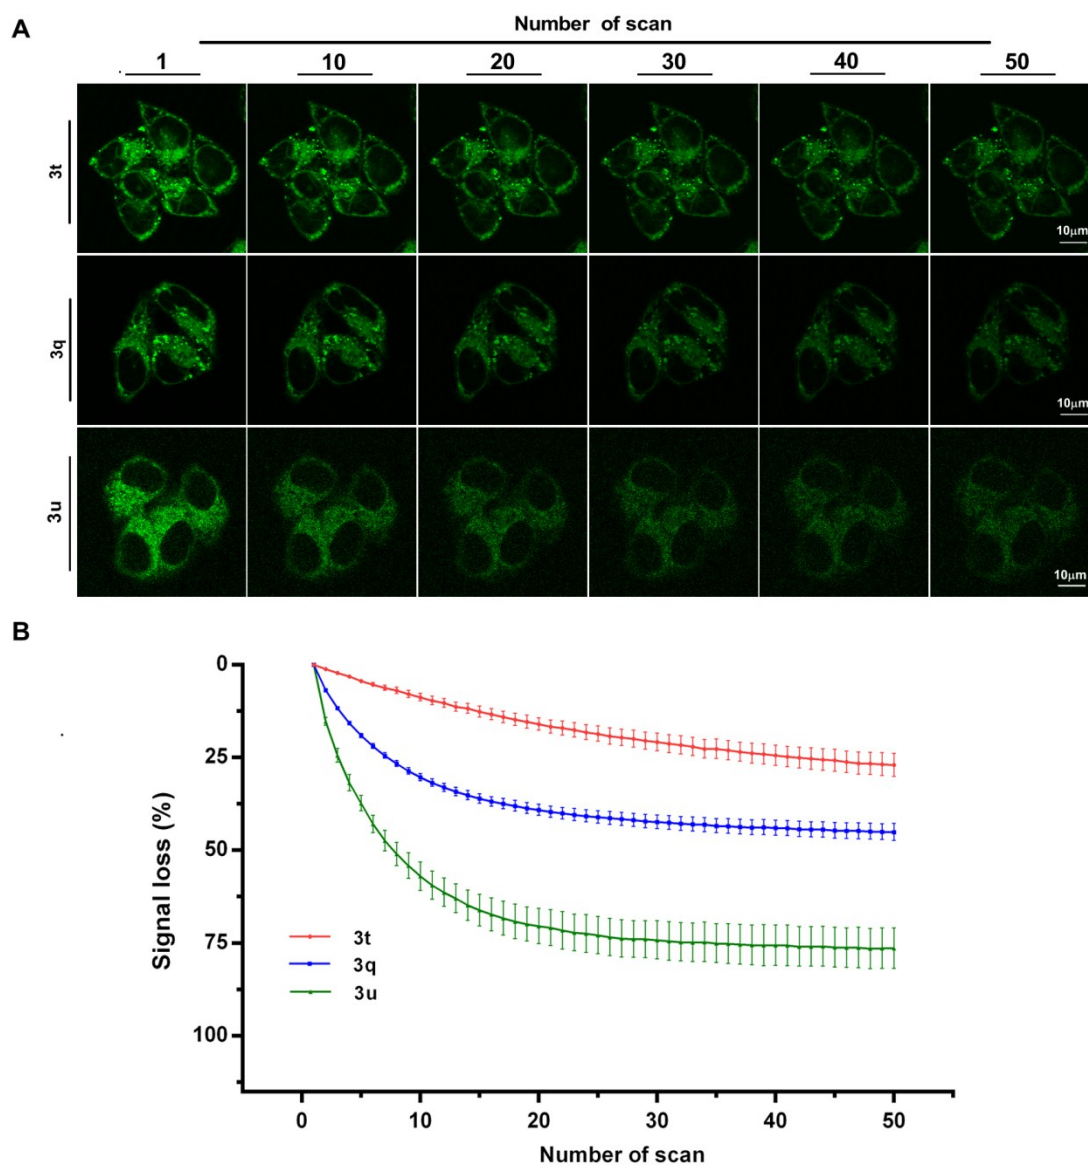

**Figure S10.** Photo-stability analysis of probes in HeLa cells. (A) Confocal fluorescence images of the HeLa cells incubated with **3t** (1  $\mu$ M), **3q** (1  $\mu$ M) and **3u** (1  $\mu$ M) with increasing number of scans (irradiation time: 5.36 s/scan).  $\lambda_{\text{ex}}$  = 405 nm,  $\lambda_{\text{em}}$  = 440-480 nm, 0.1% laser power, scale bar = 10  $\mu$ m; (B) Signal loss (%) of fluorescent emission of probes in the HeLa cells with increasing number of scans using confocal microscope. The scan number was shown in the X-axis.

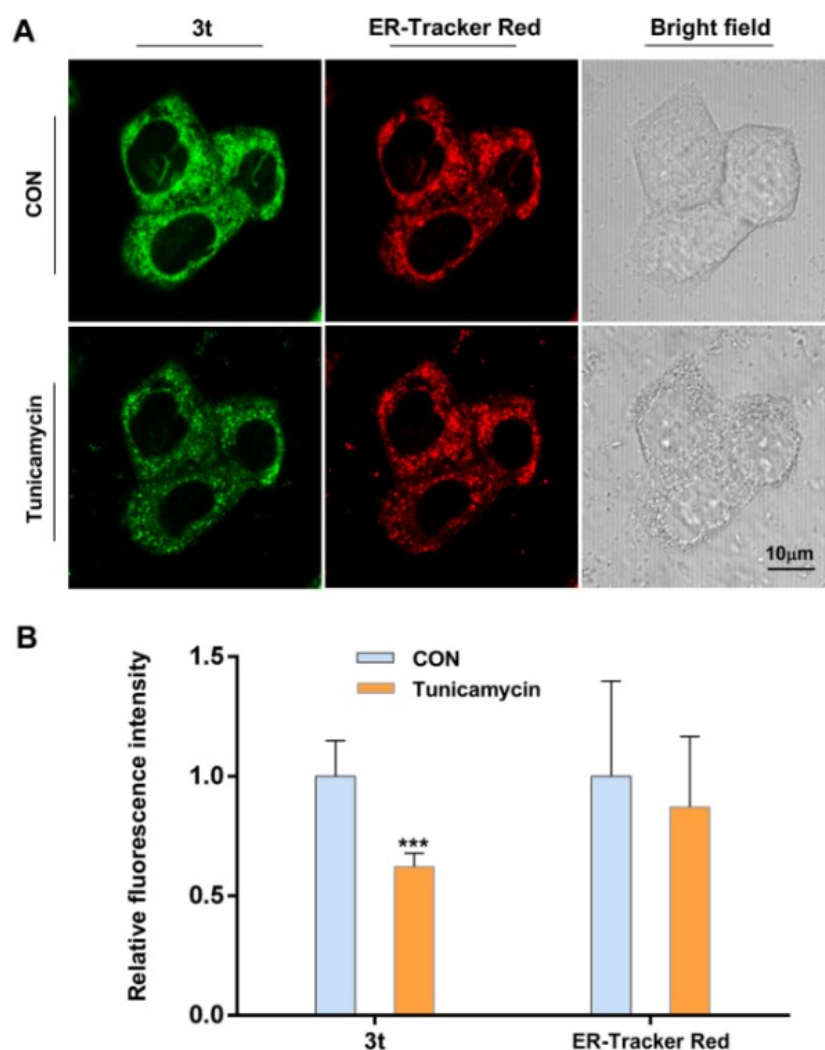

**FigureS11.** Imaging **3t** in living HeLa cells upon ER stress. (A) HeLa cells were incubated with **3t** and **ETR** for 30 min at 37 °C, and then washed with PBS (pH 7.4) followed by tunicamycin (TM, 10  $\mu$ M) treatment. Fluorescence was obtained at 10 min after TM incubation. Scale bar=10  $\mu$ m. The fluorescence of **3t** fluorescence was monitored at 440-480 nm ( $\lambda_{ex}$ =405 nm), the fluorescence of **ETR** was monitored at 600-650 nm ( $\lambda_{ex}$ = 543 nm). Scale bar=10  $\mu$ m. (B) Quantification of image data. Data were expressed as mean  $\pm$  S.E.M., a minimum of 4 images were quantified and averaged, \*\*\* $P$ <0.001 versus control.

# <sup>1</sup>H and <sup>13</sup>C NMR spectra

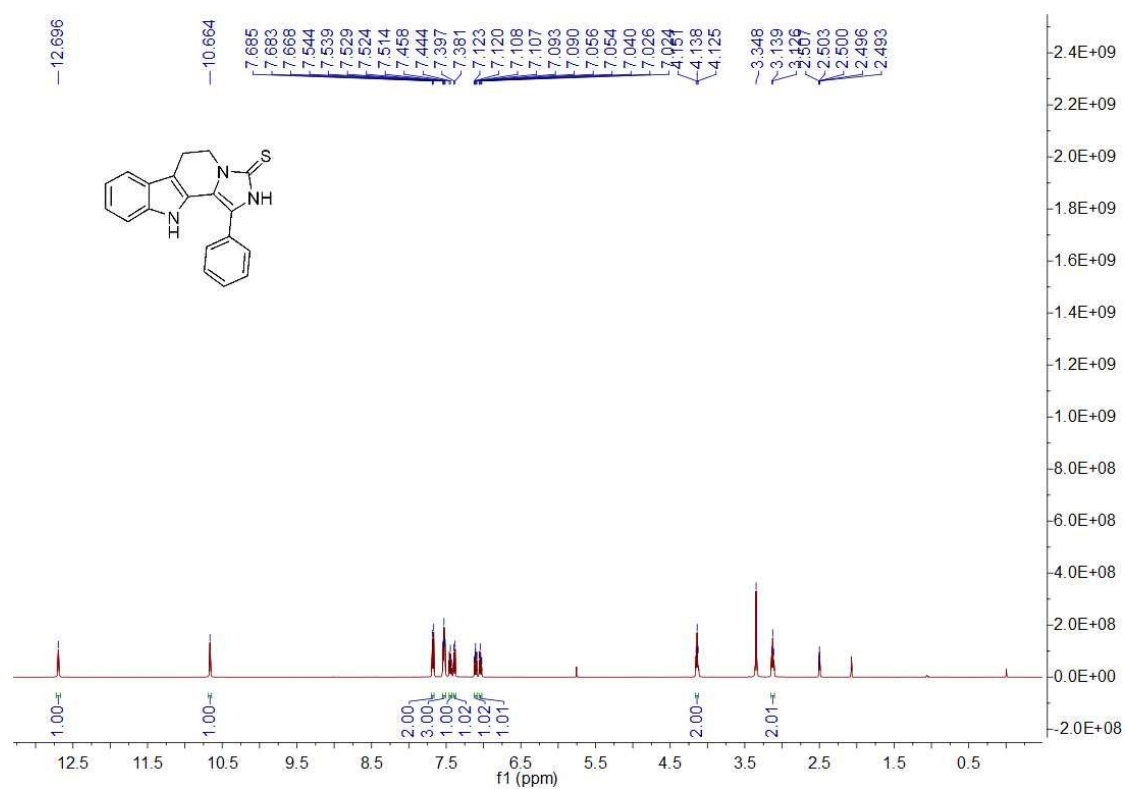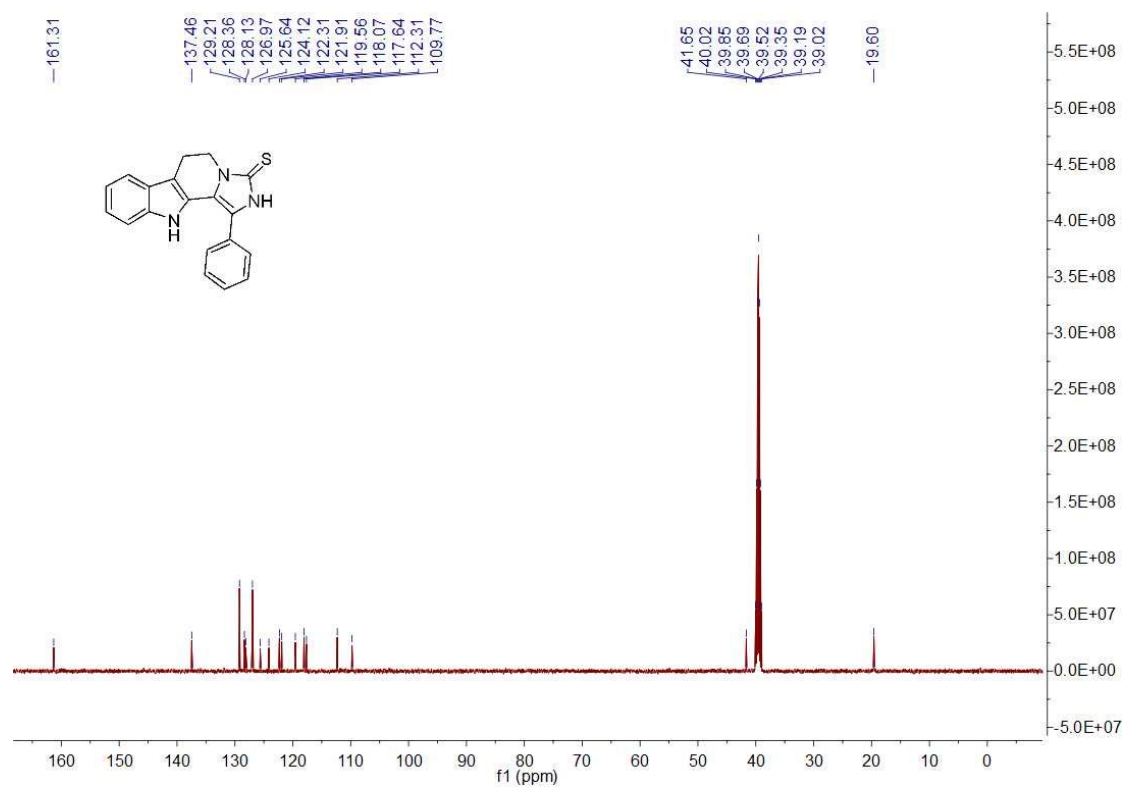

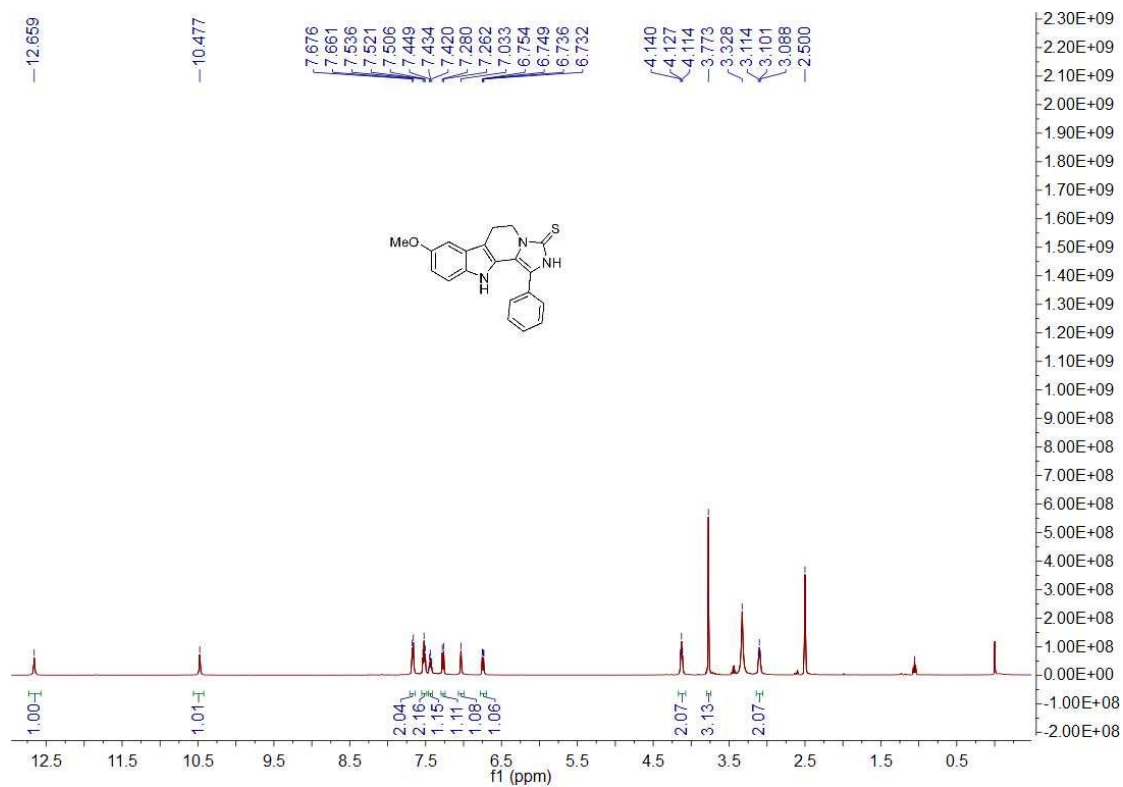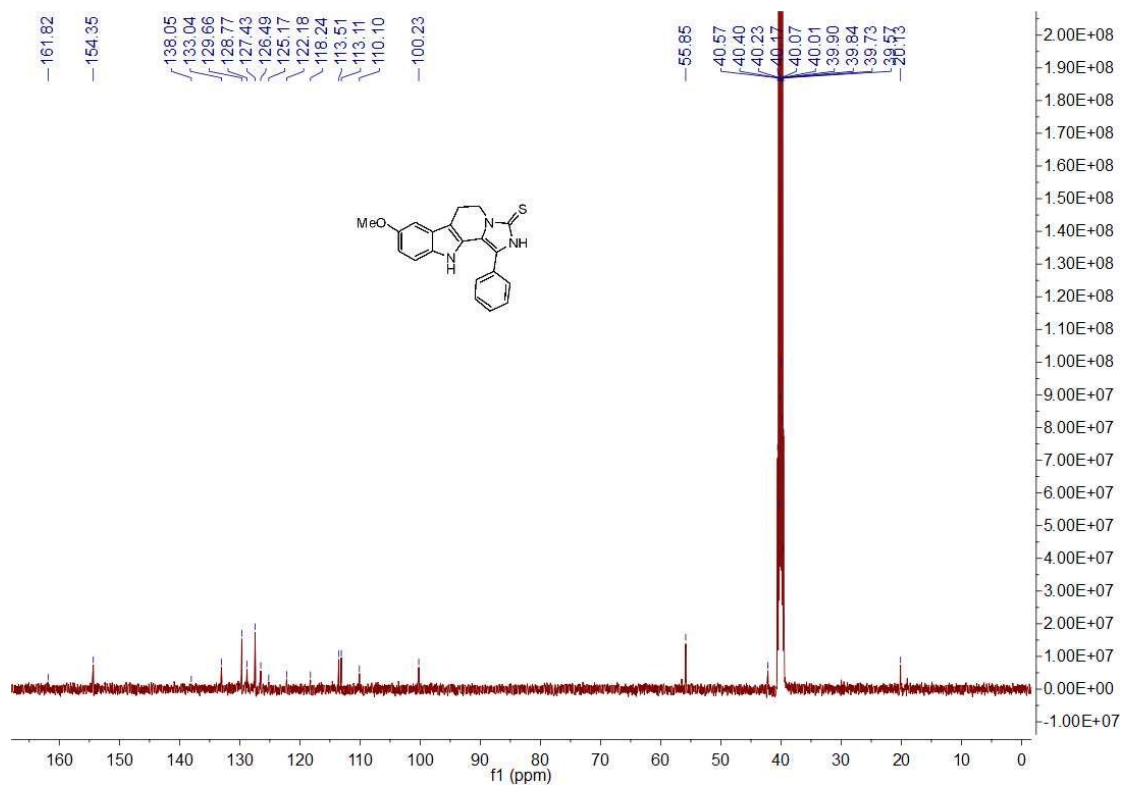

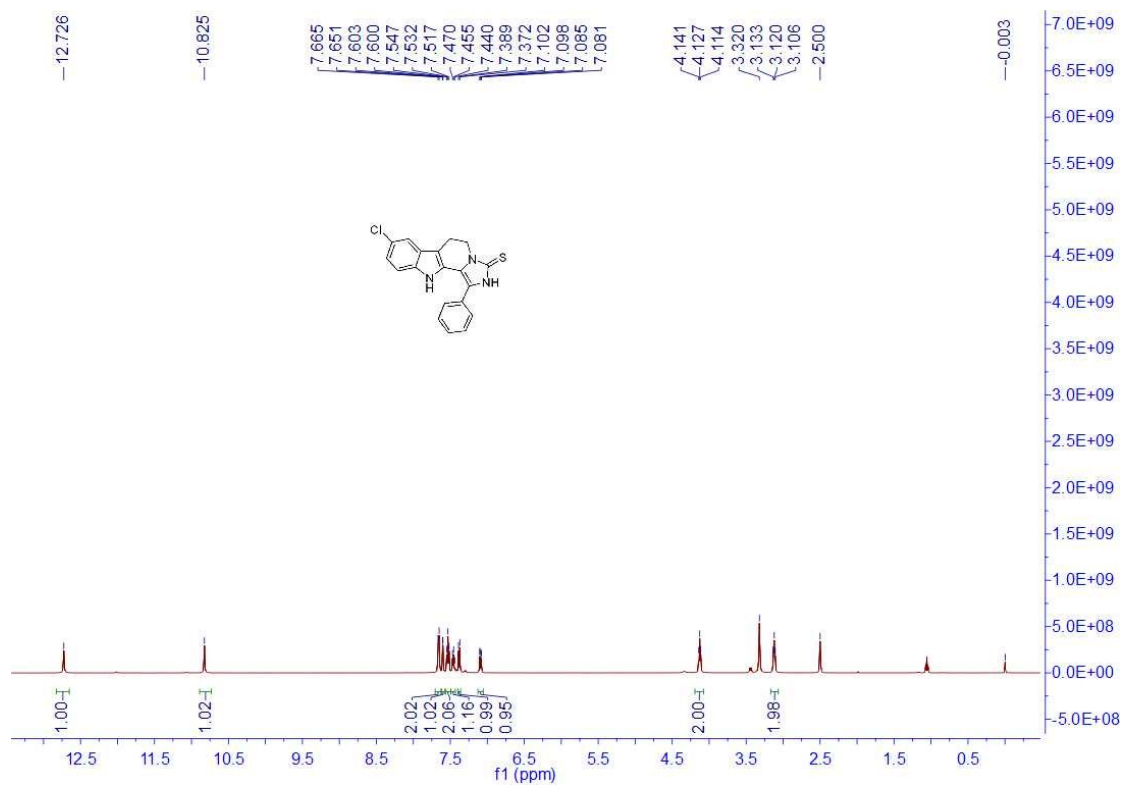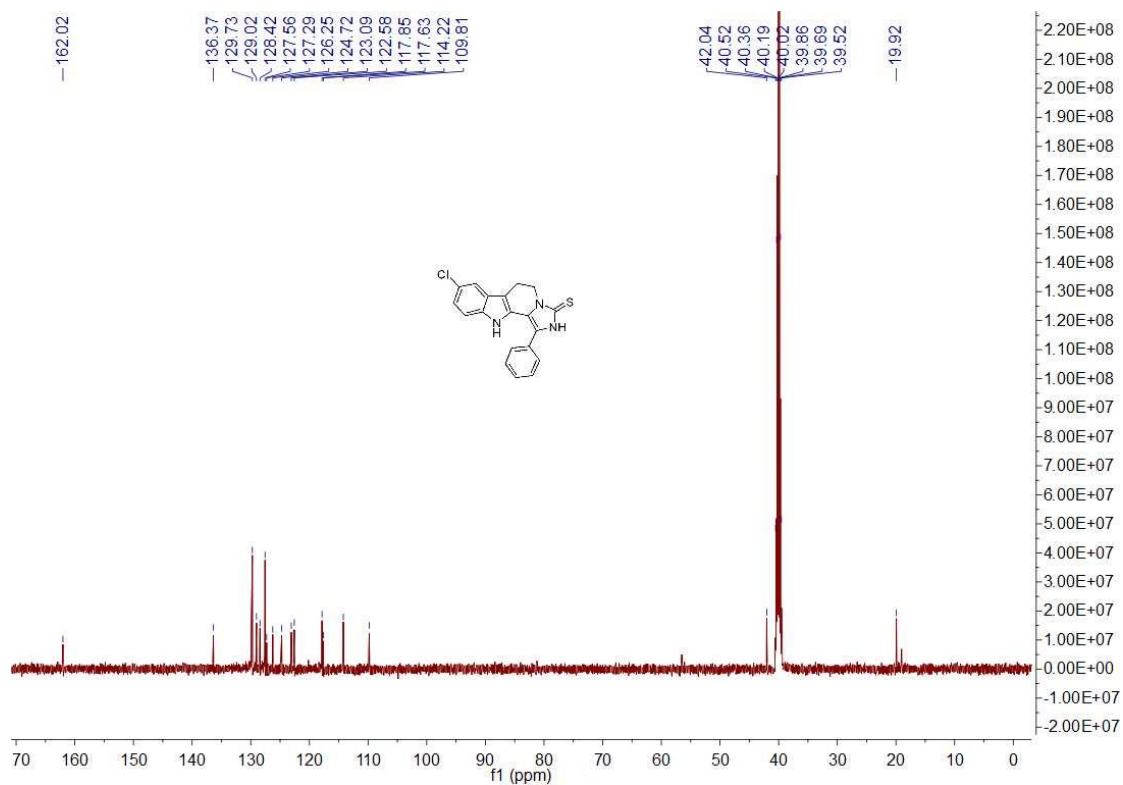



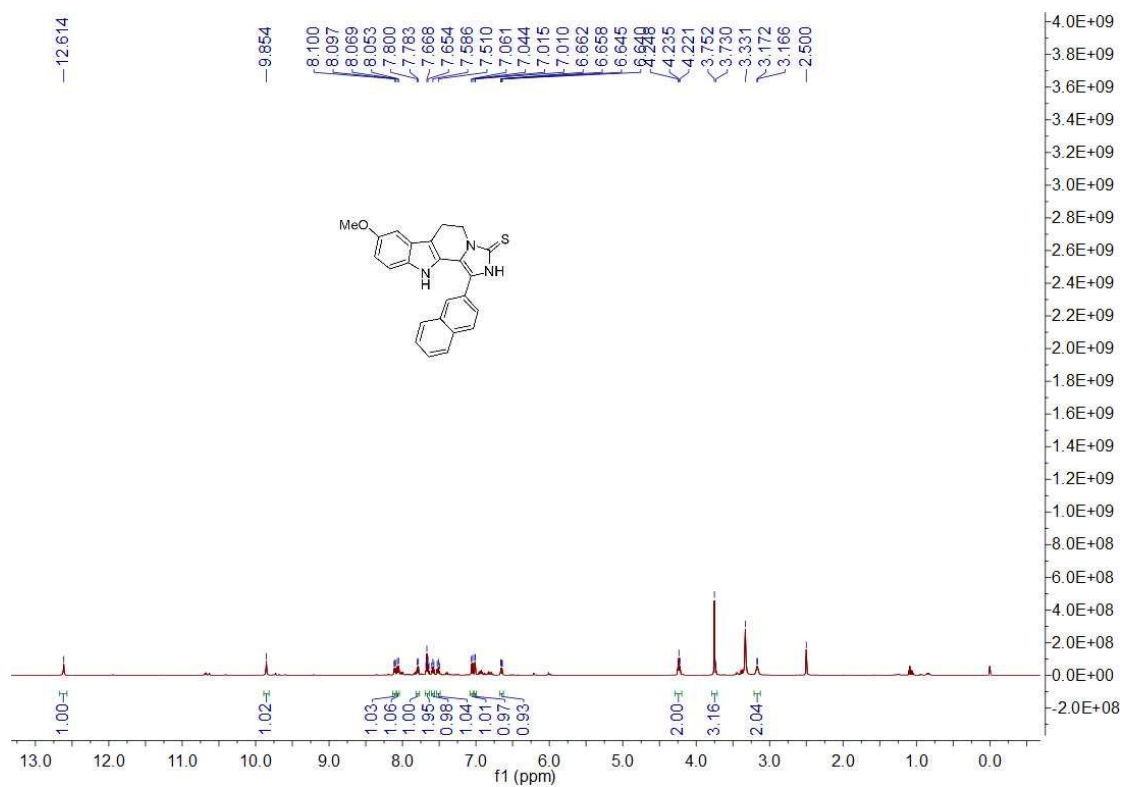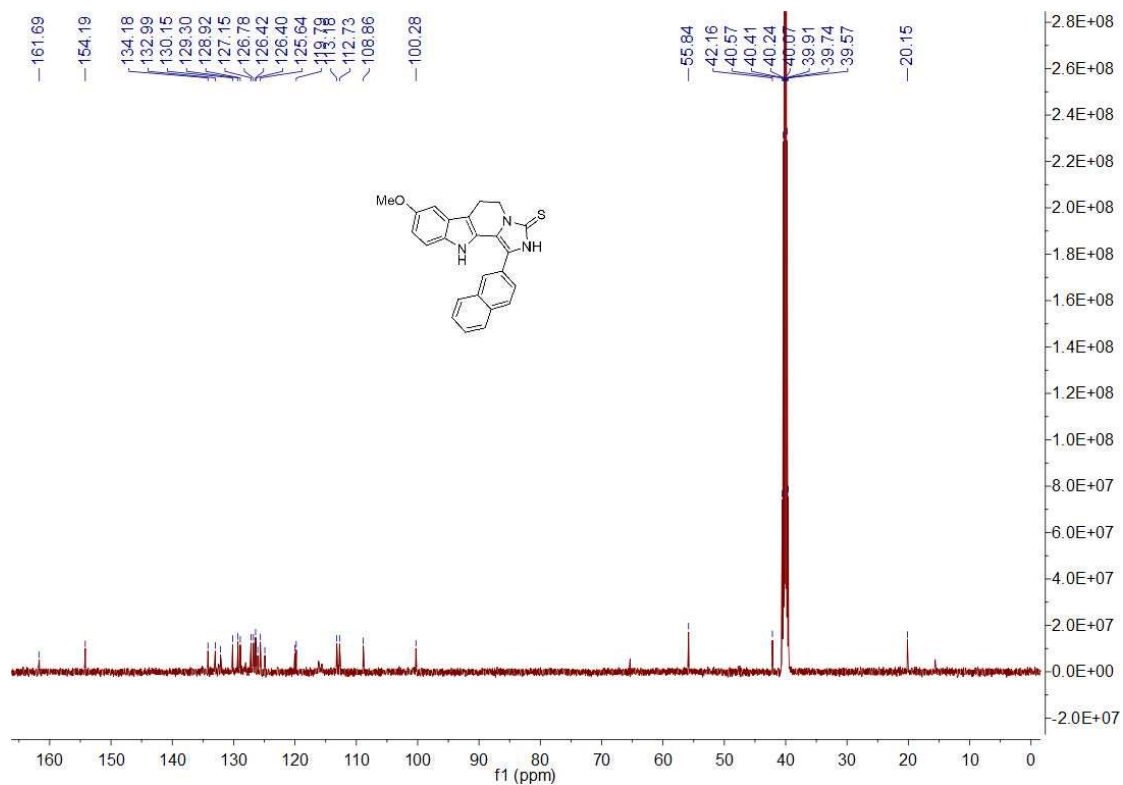

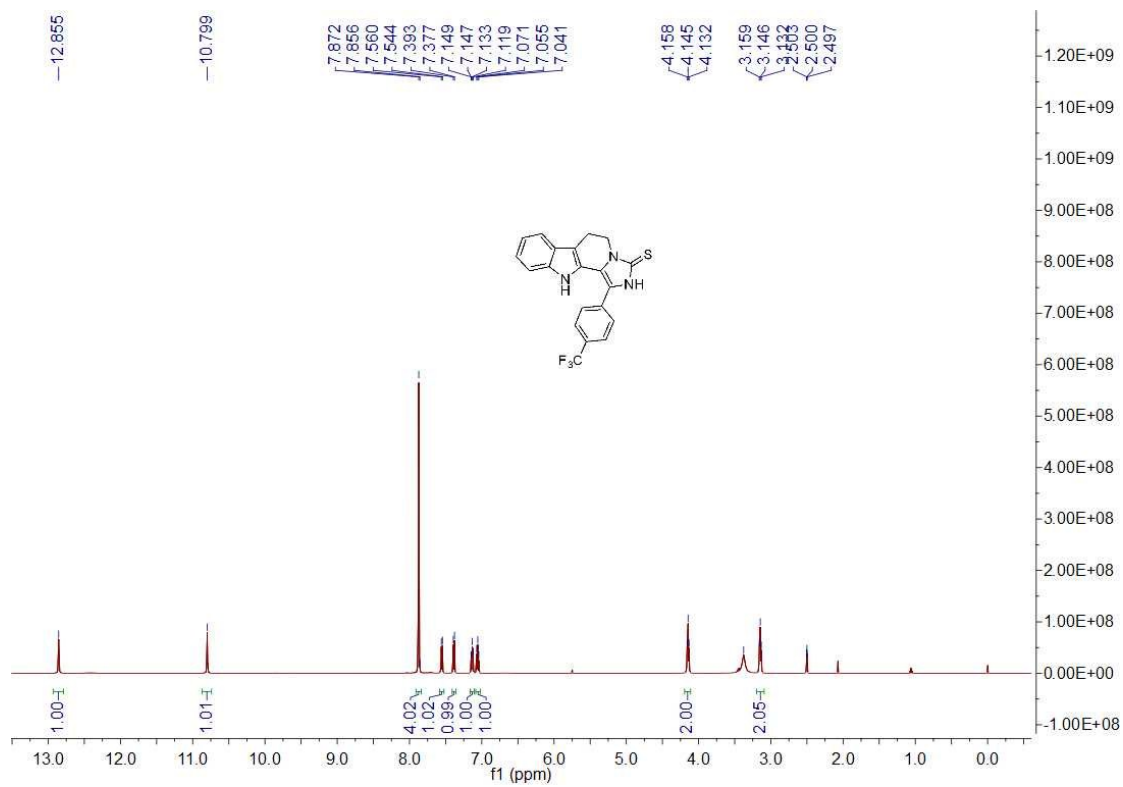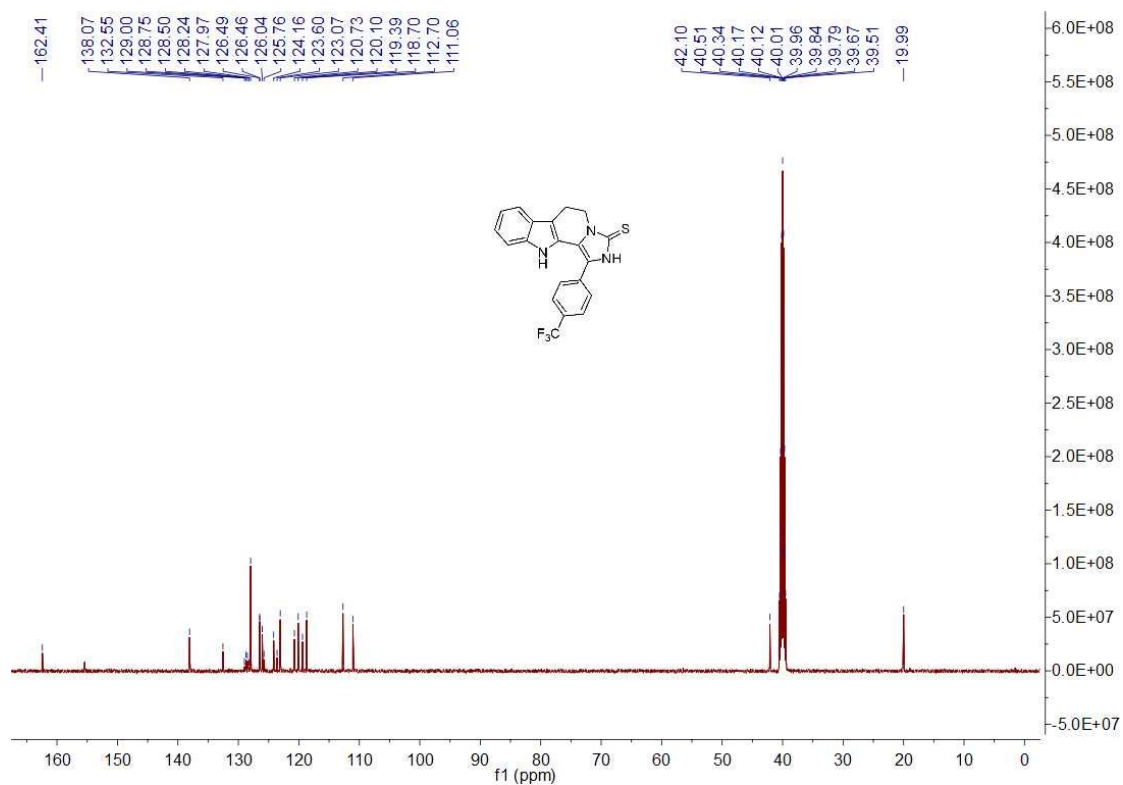



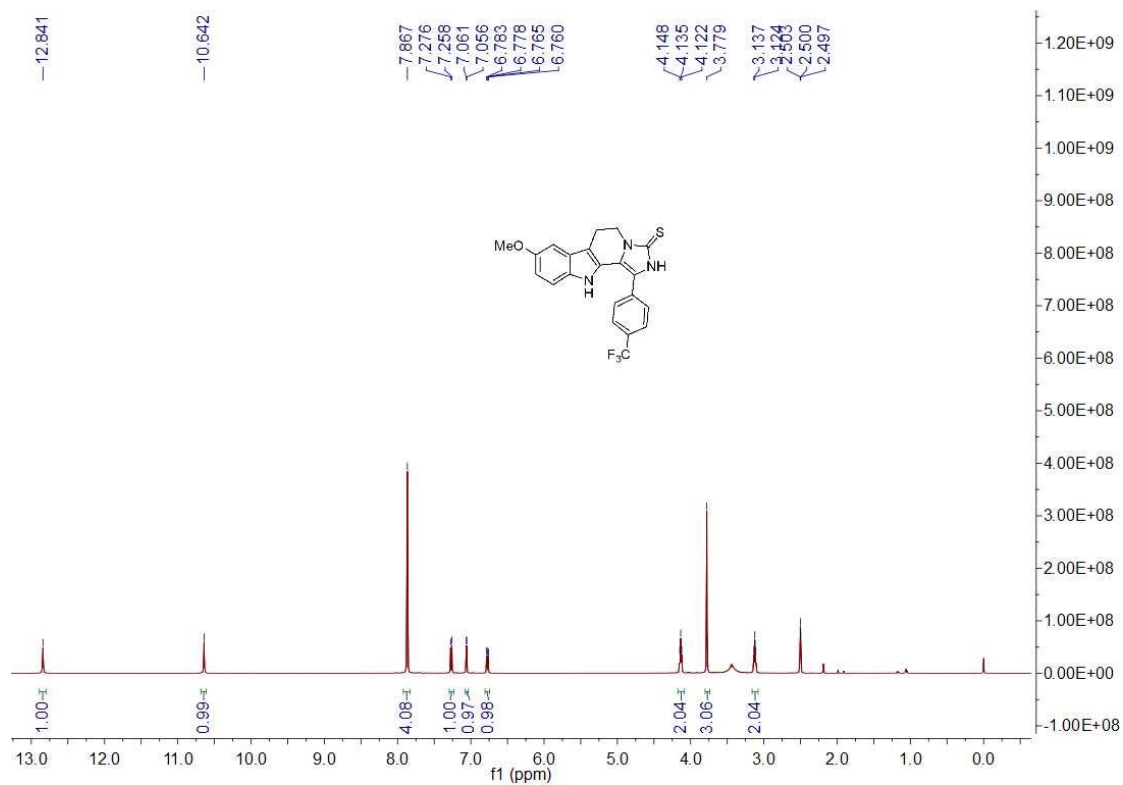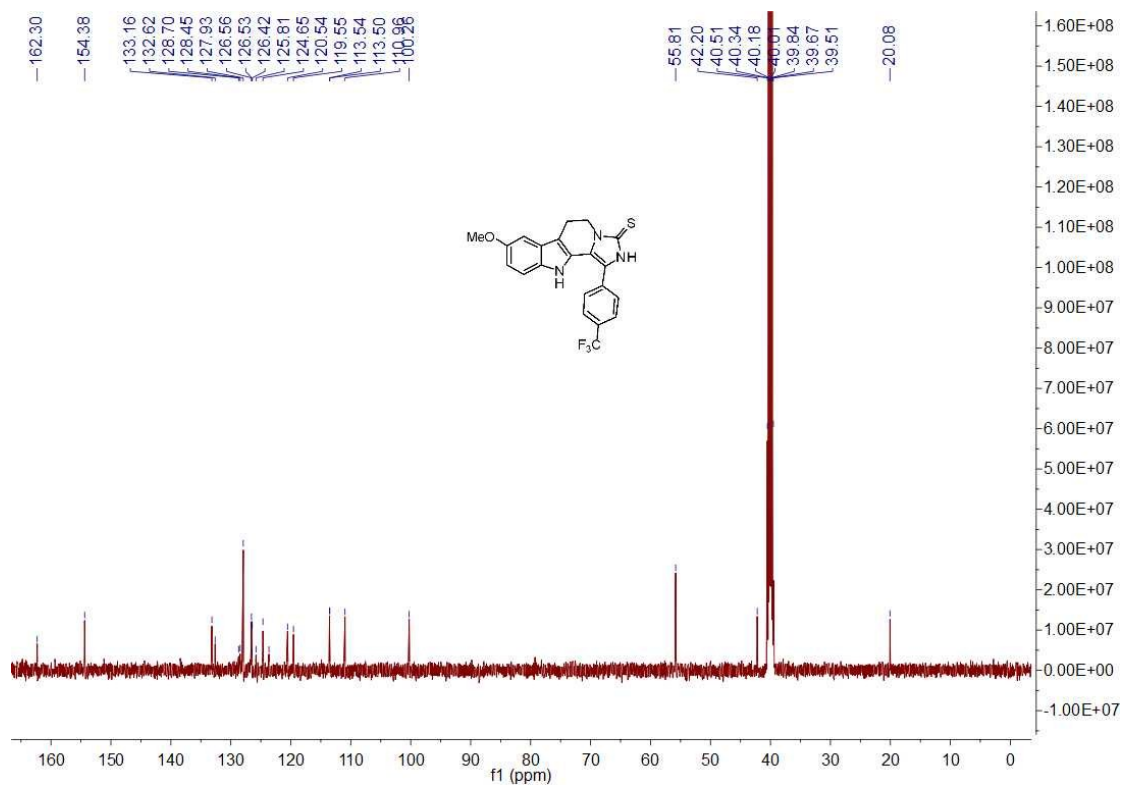

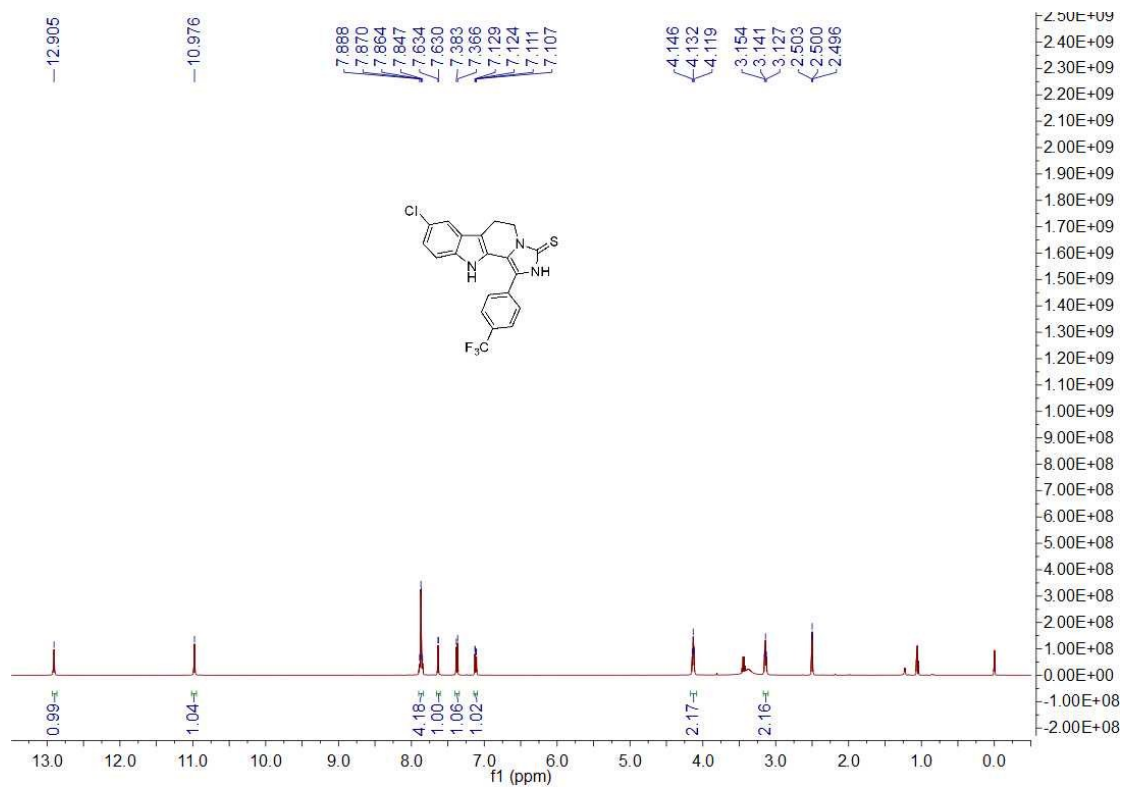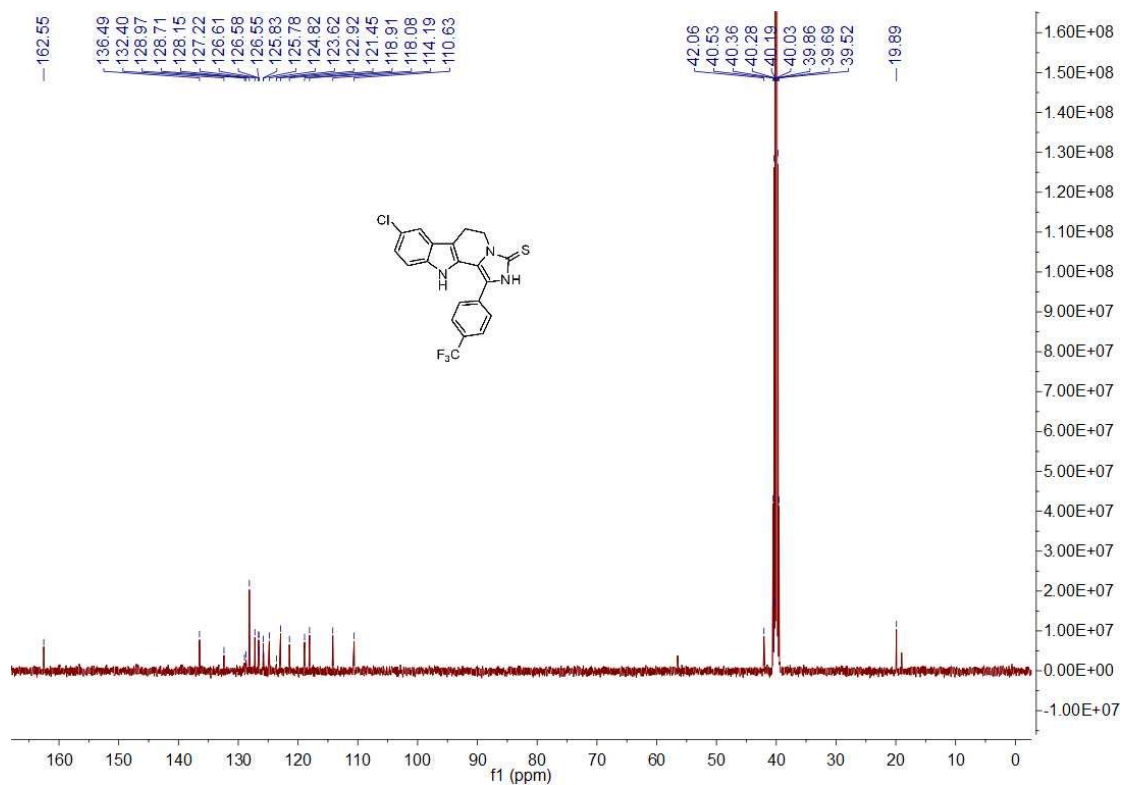

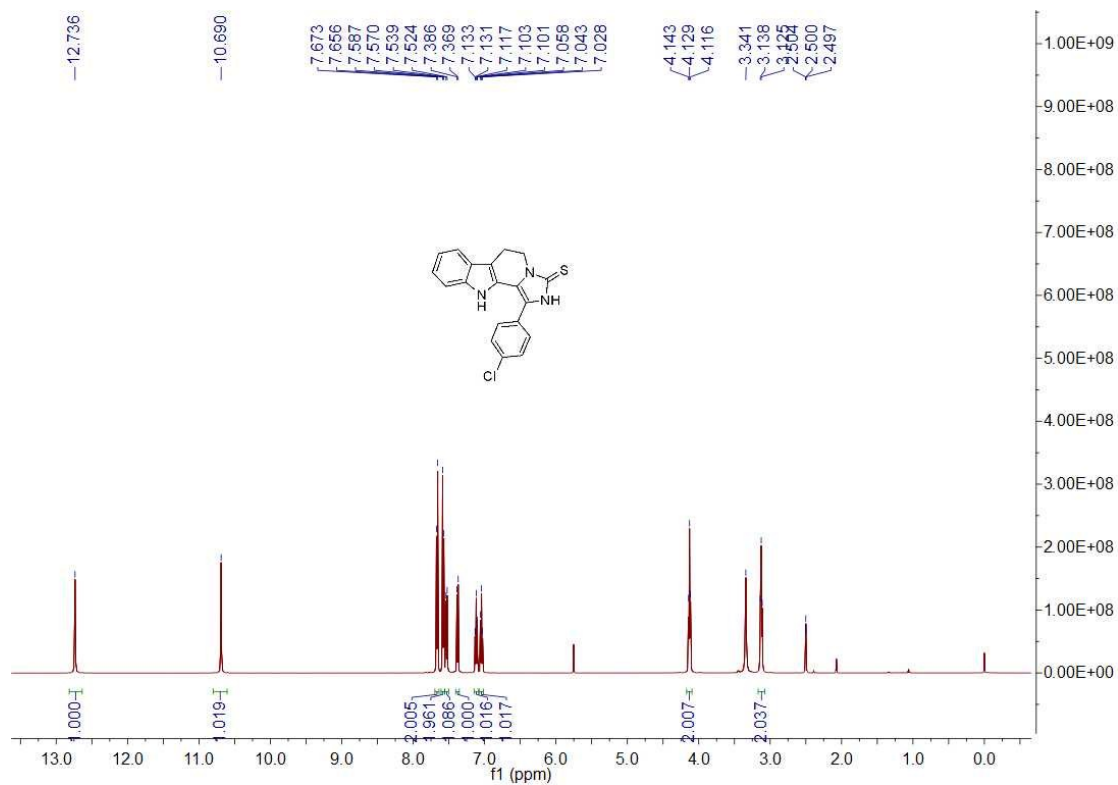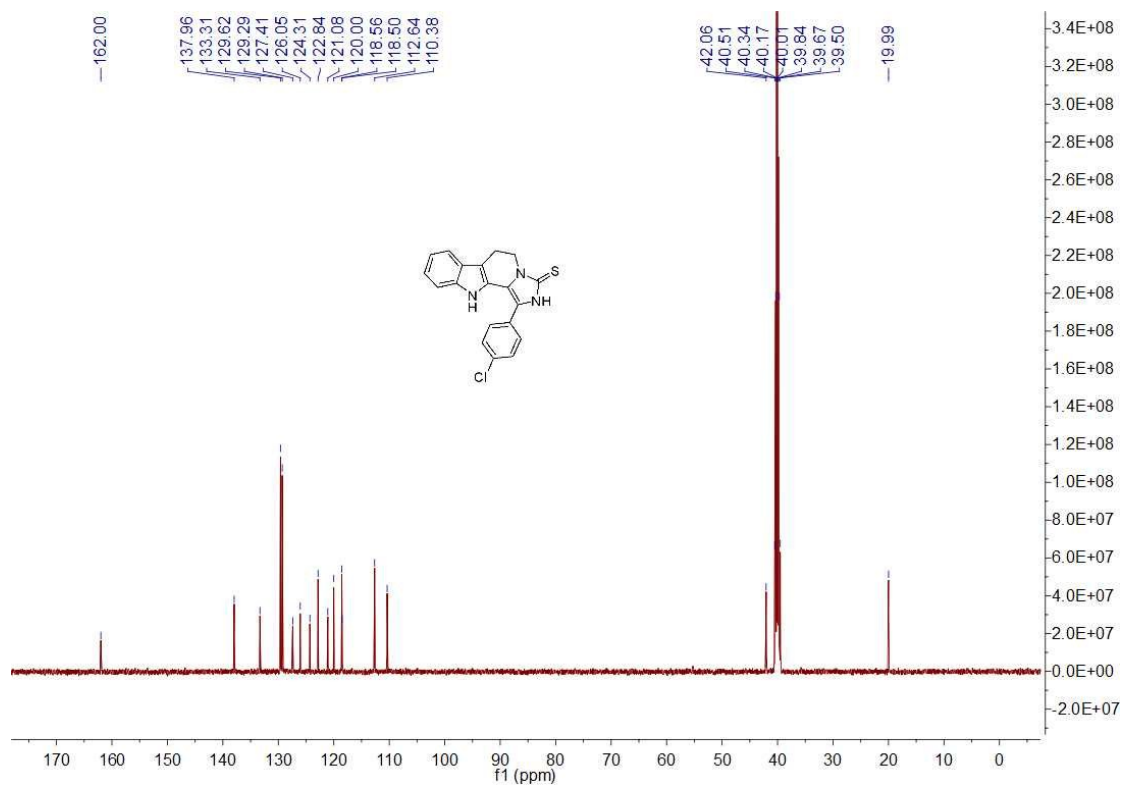

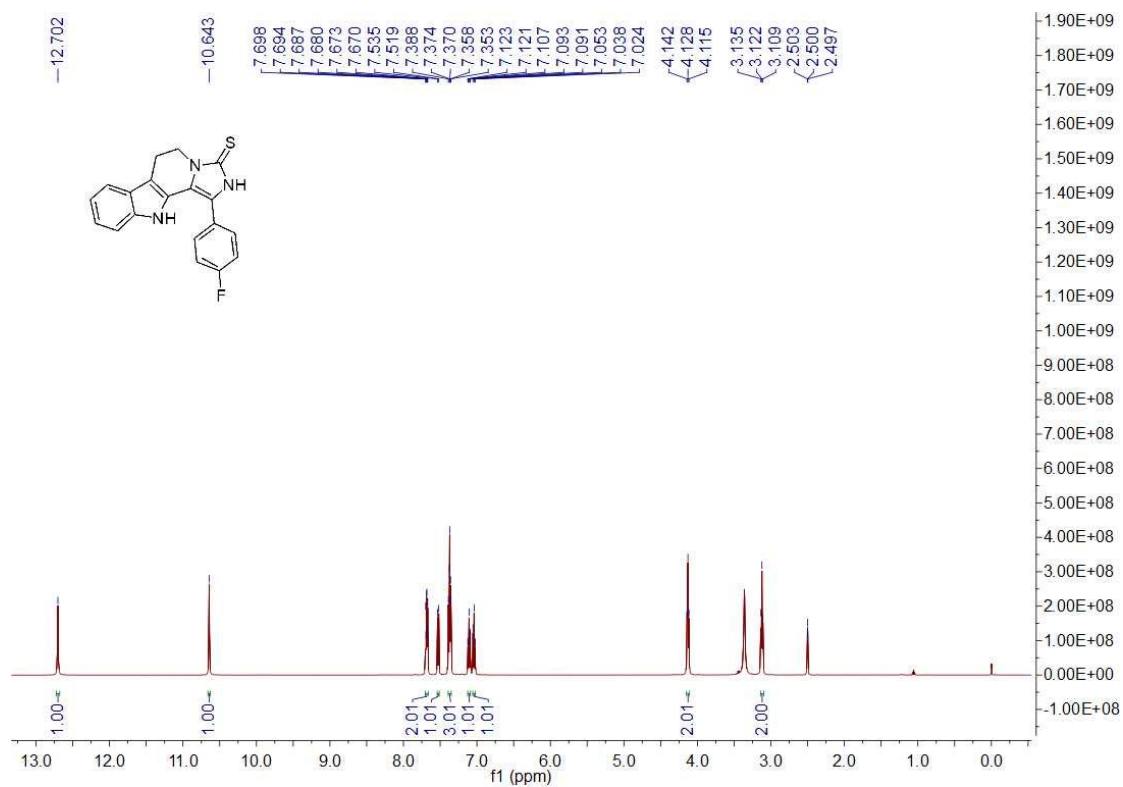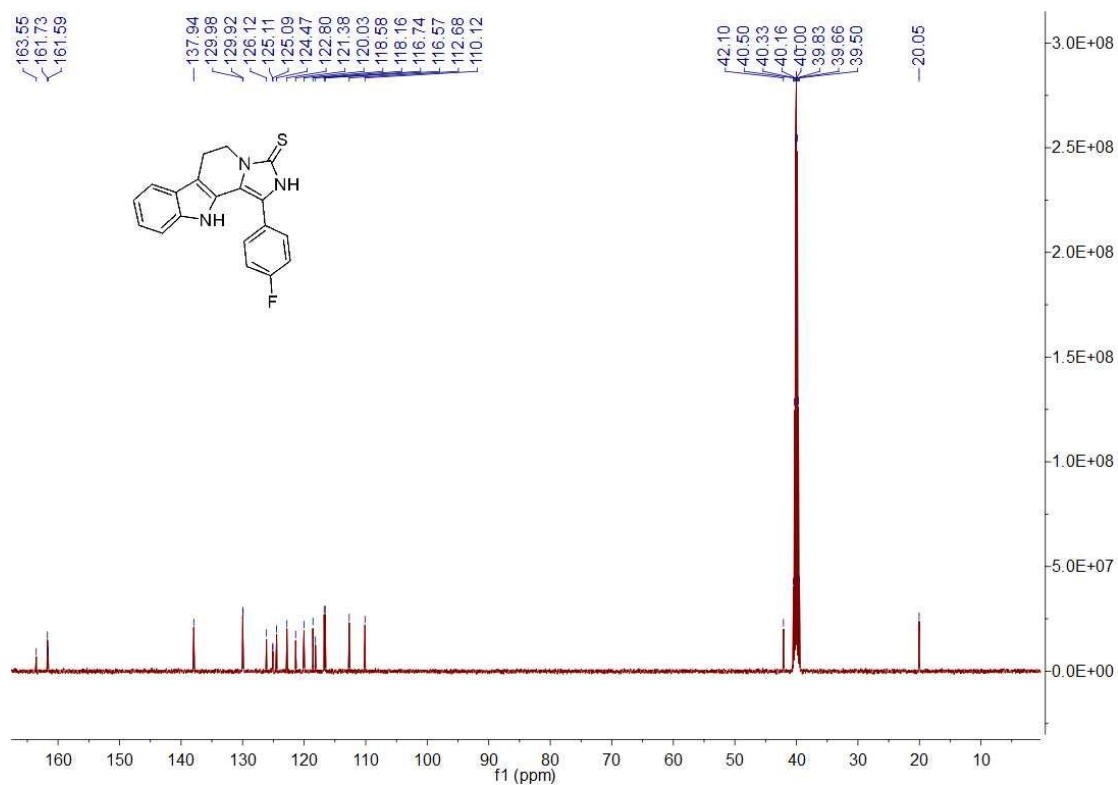

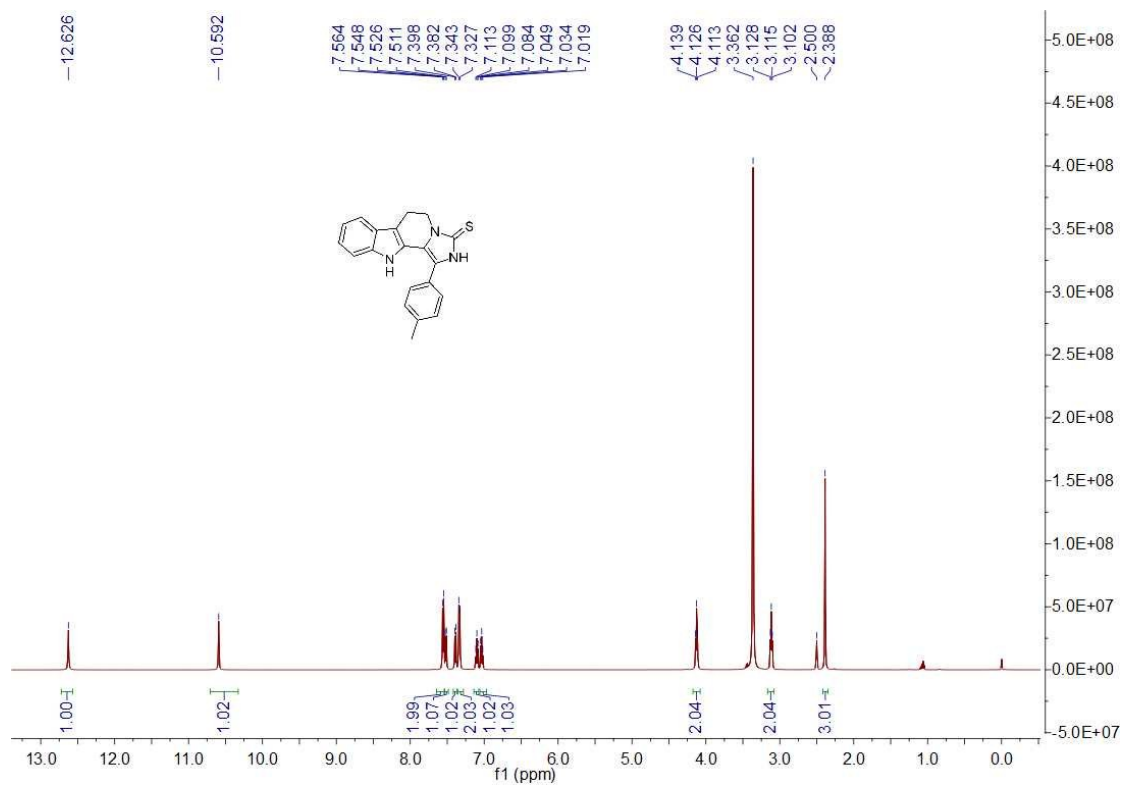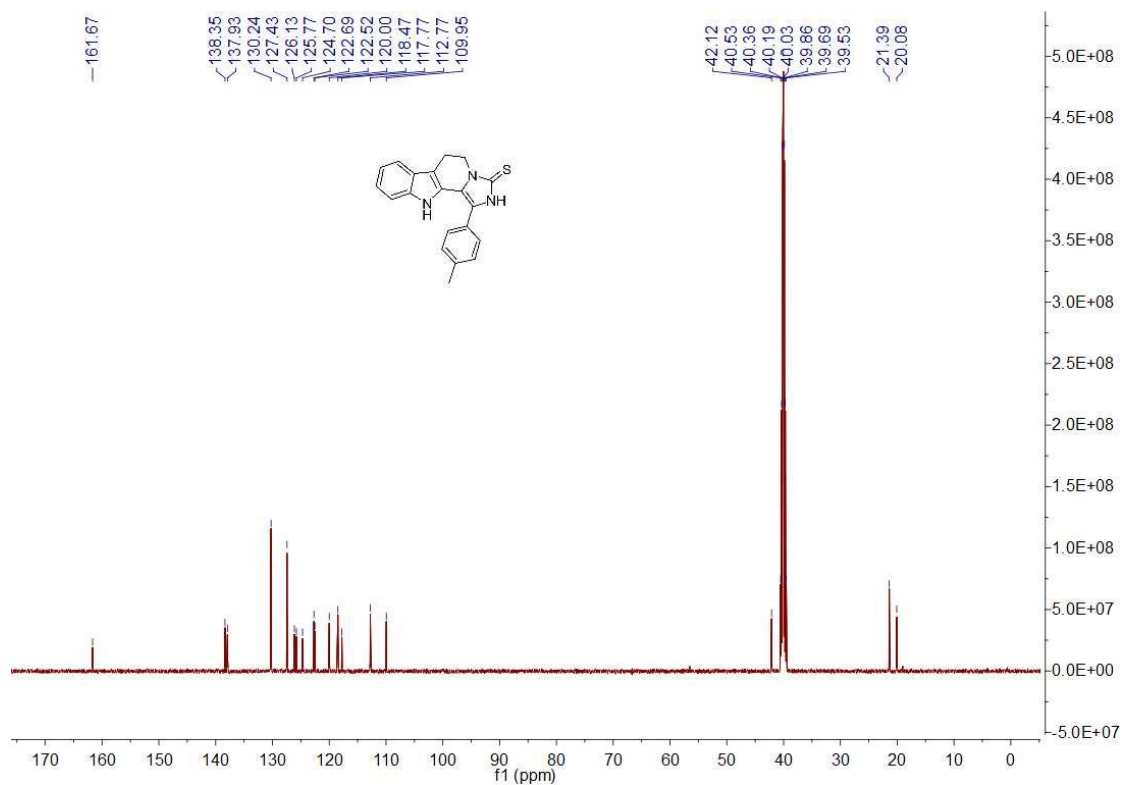

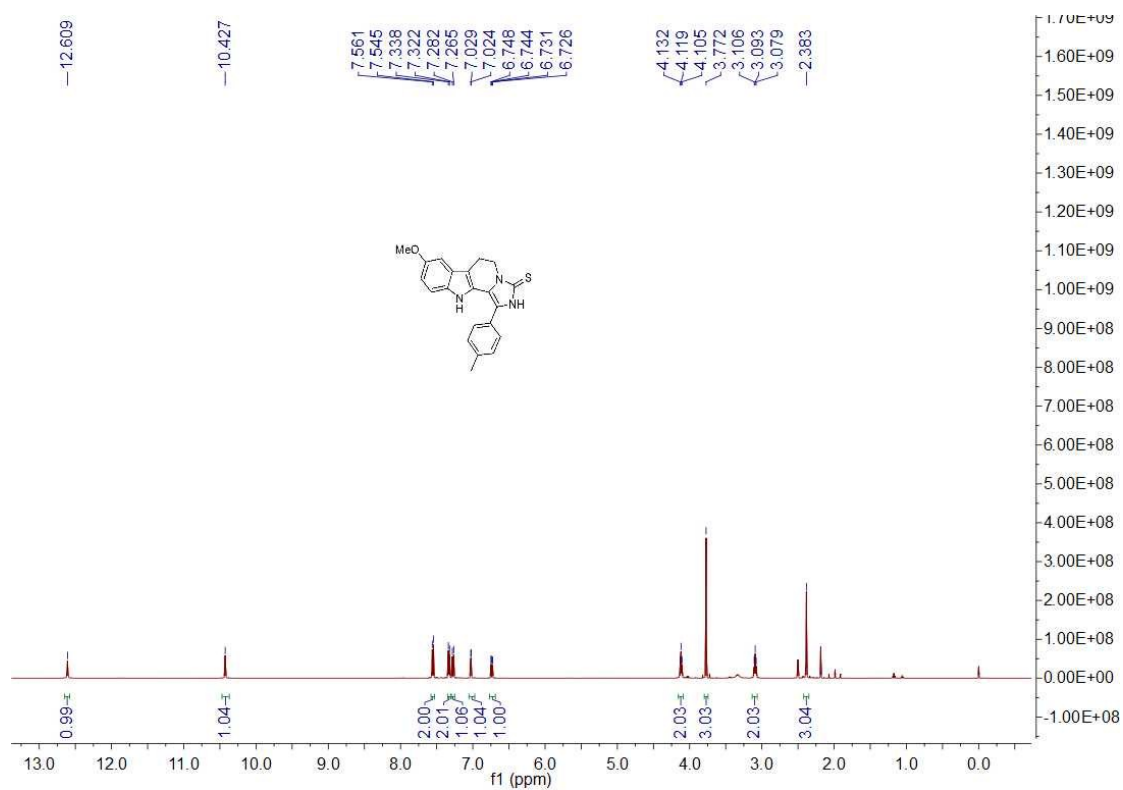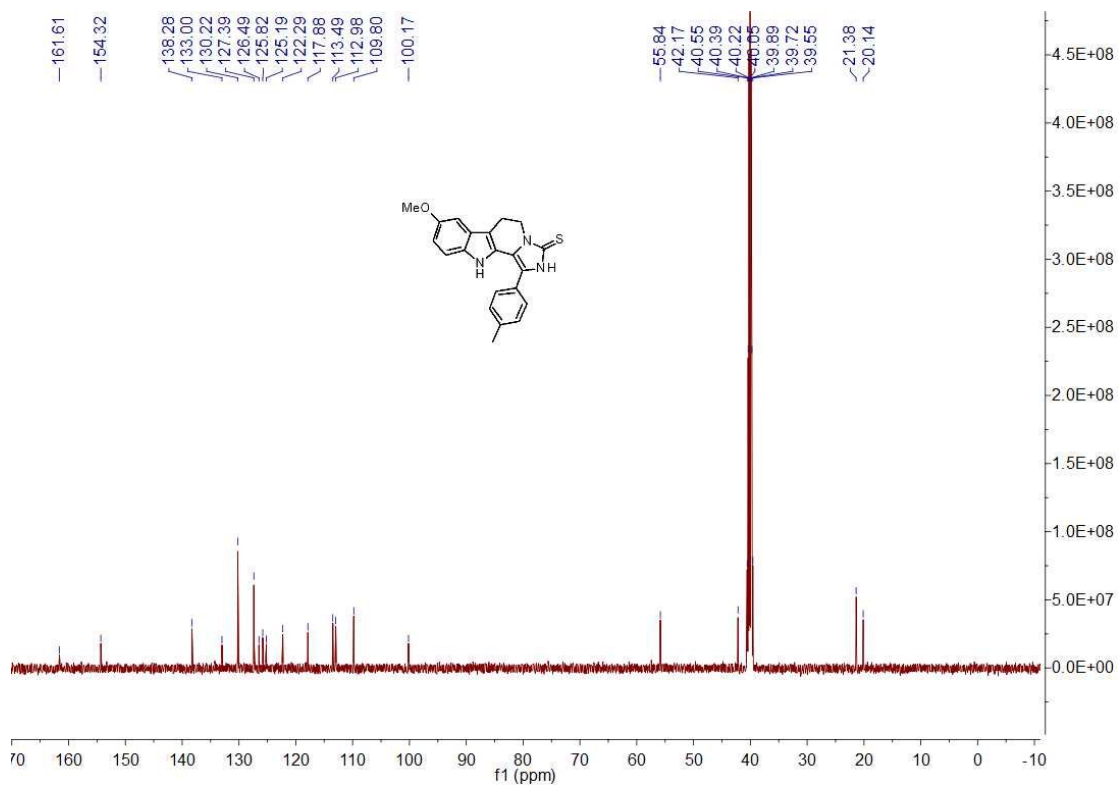

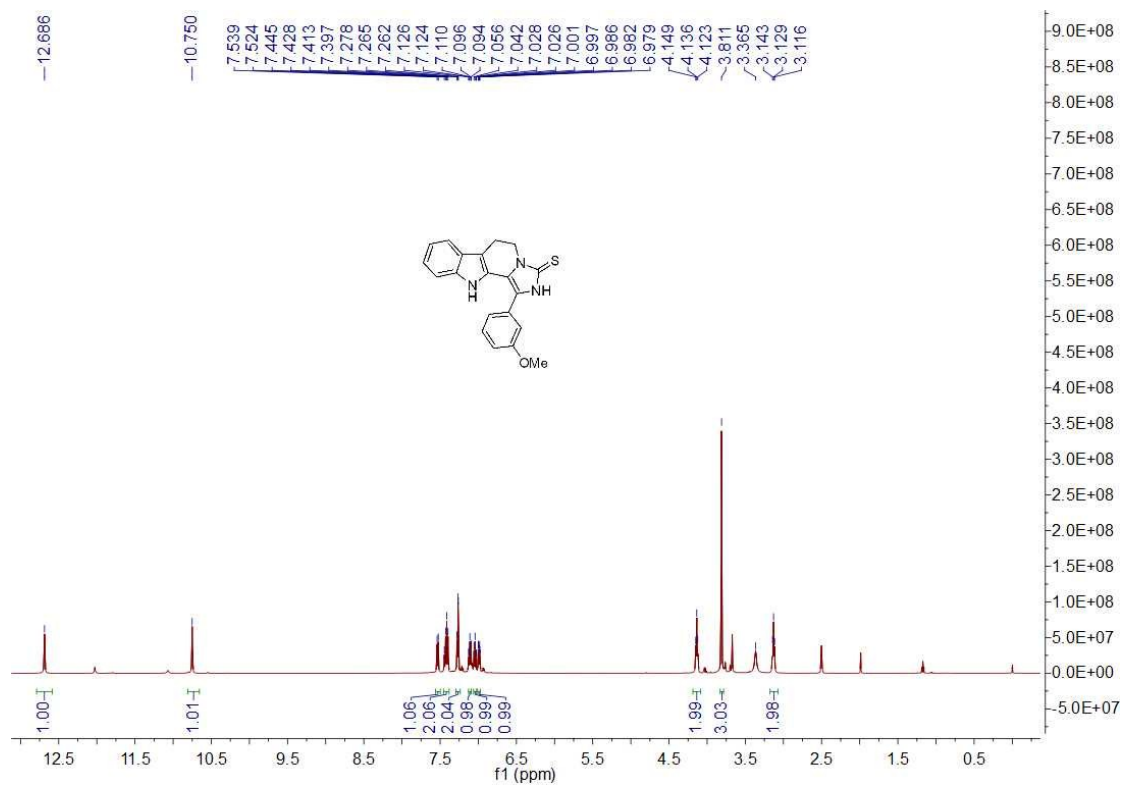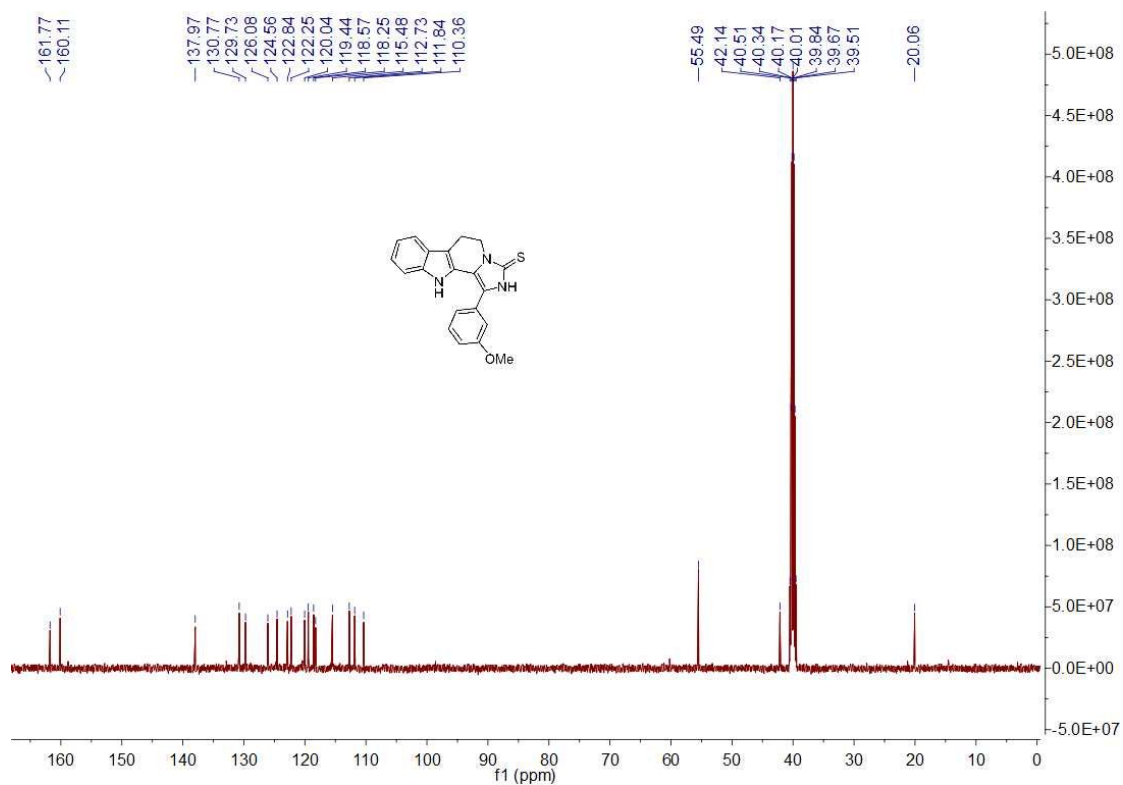



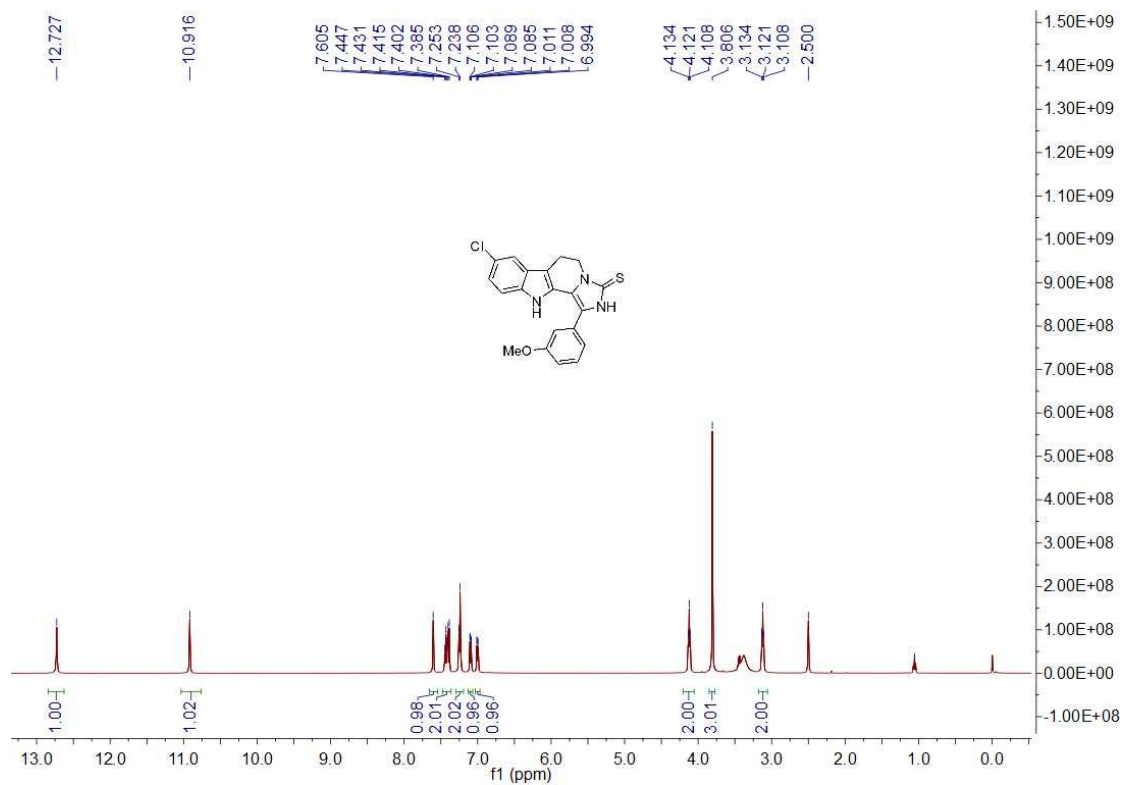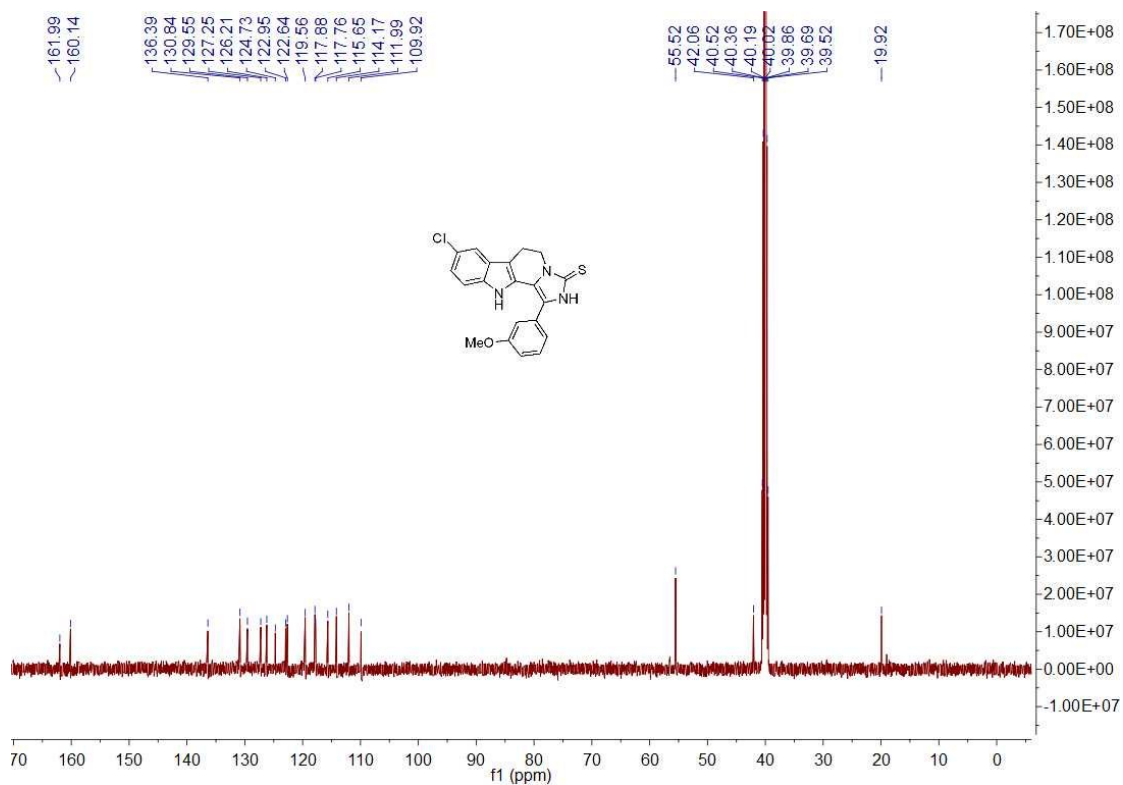



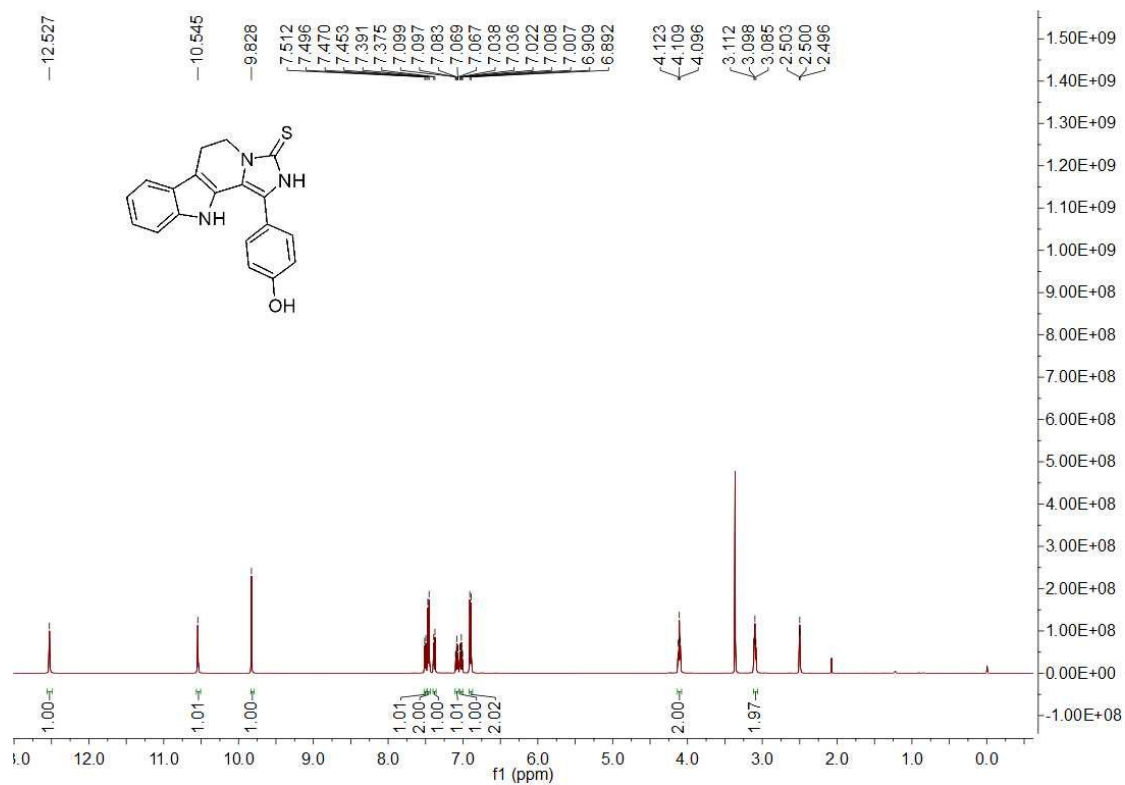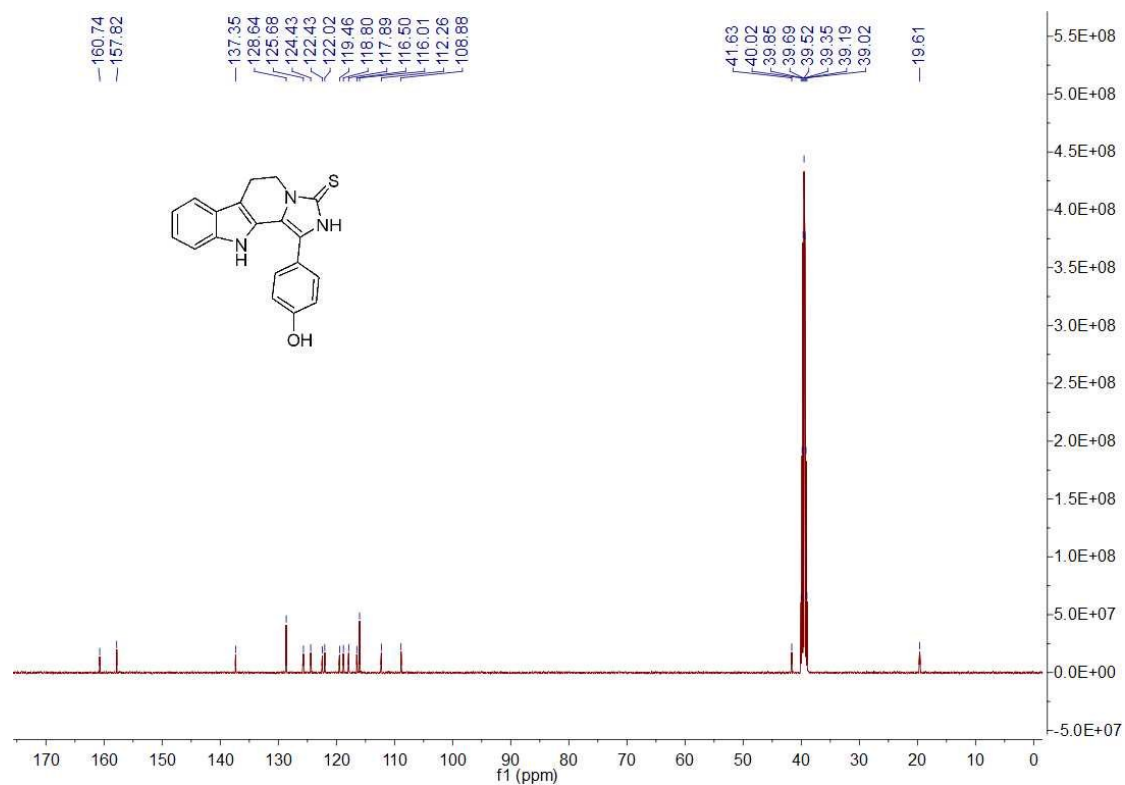

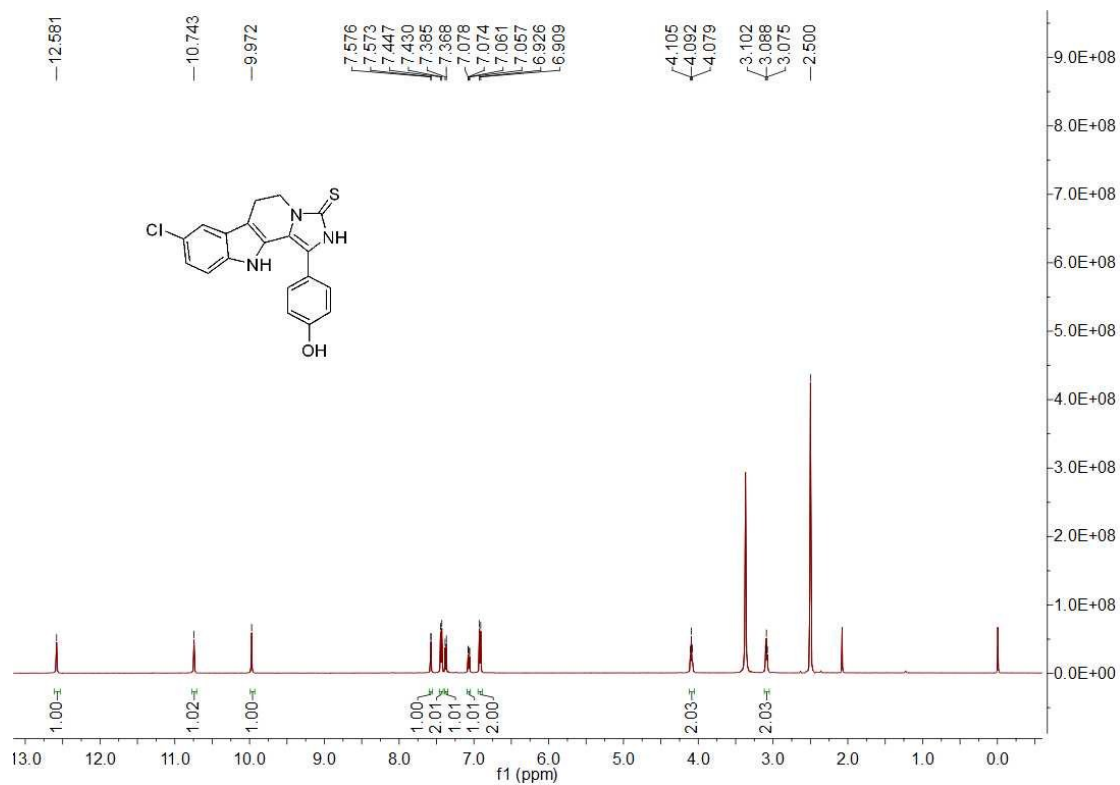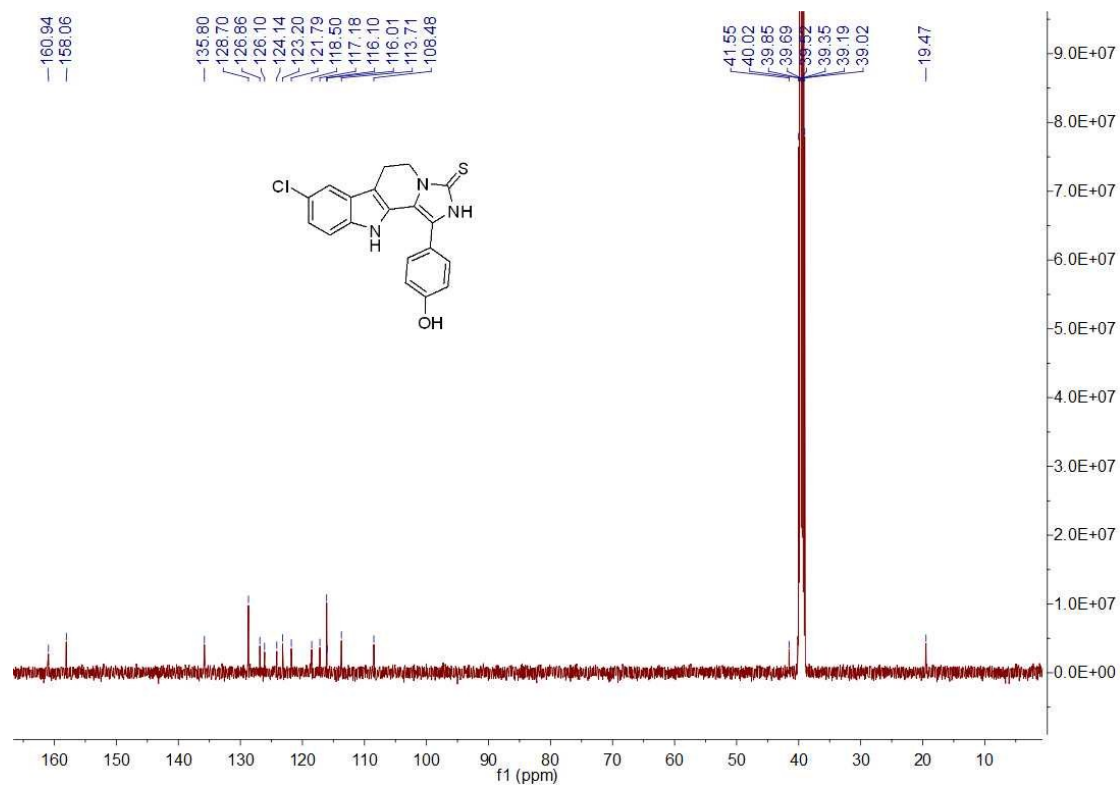

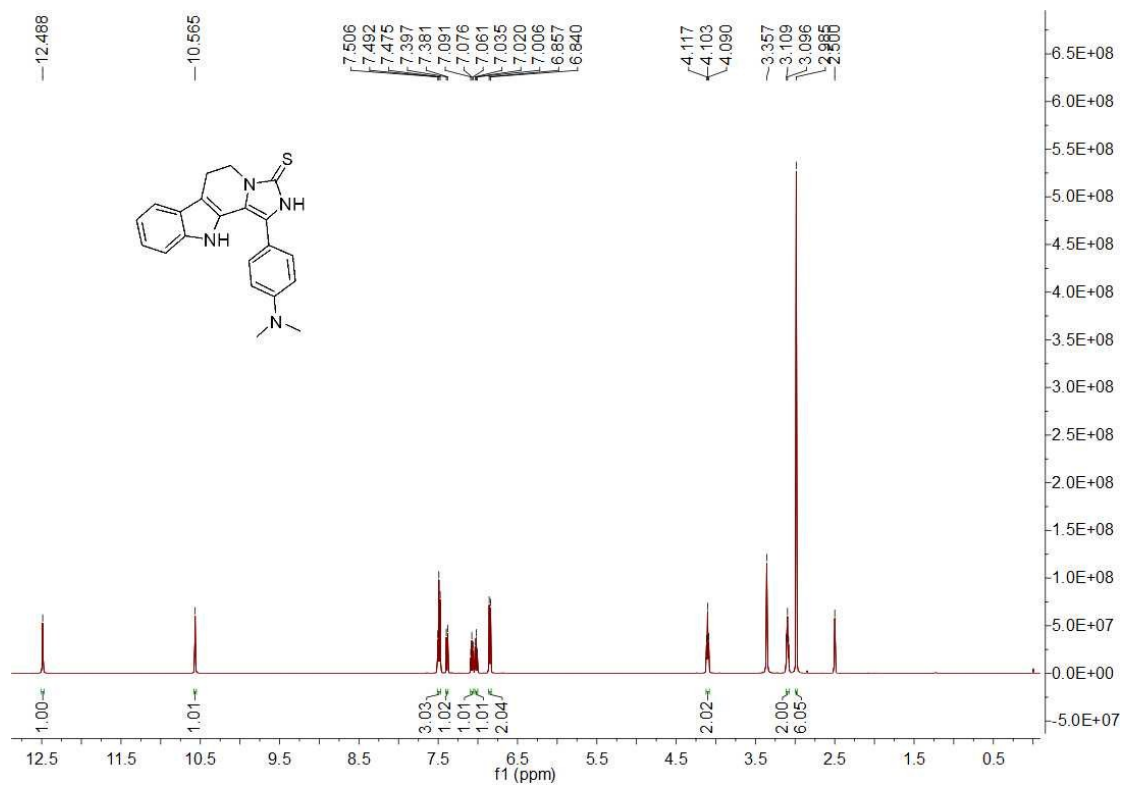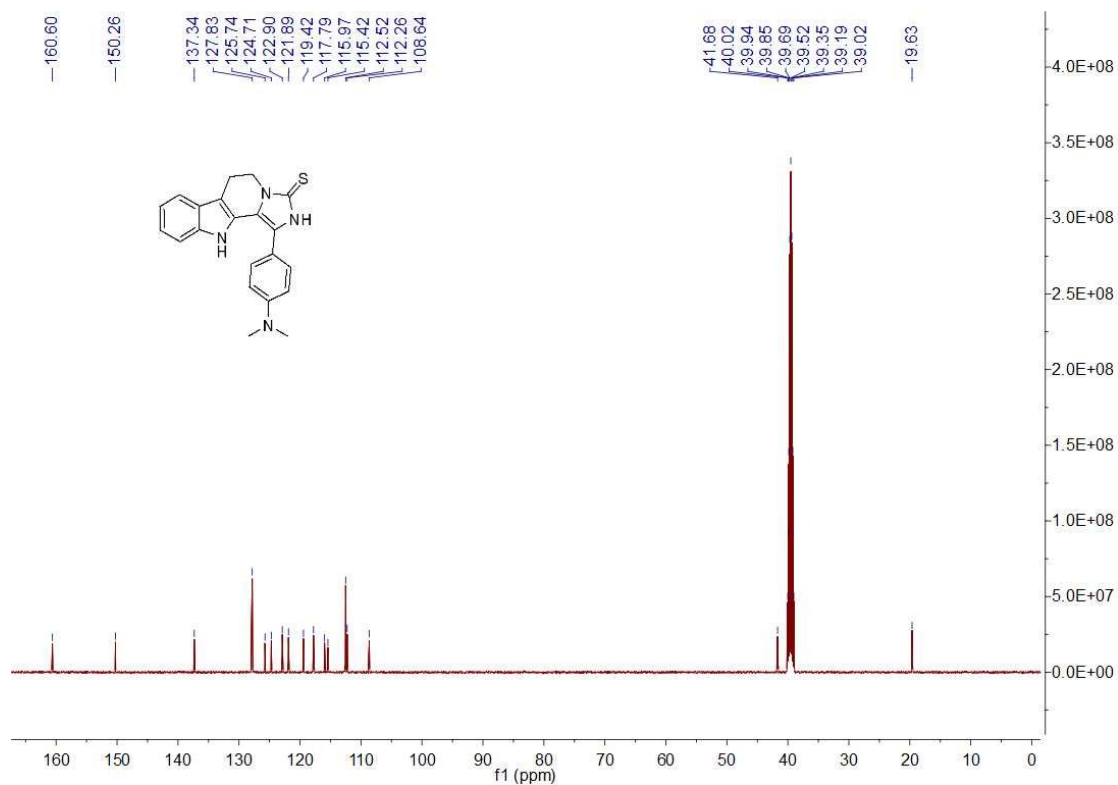

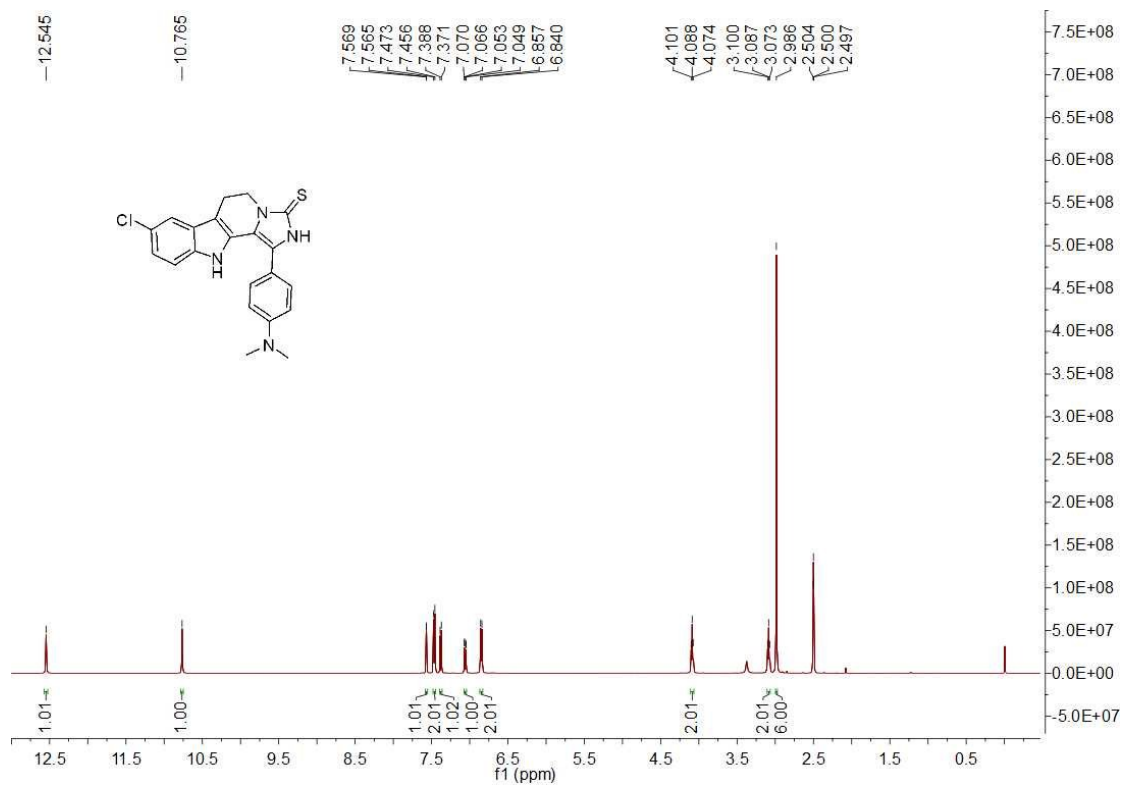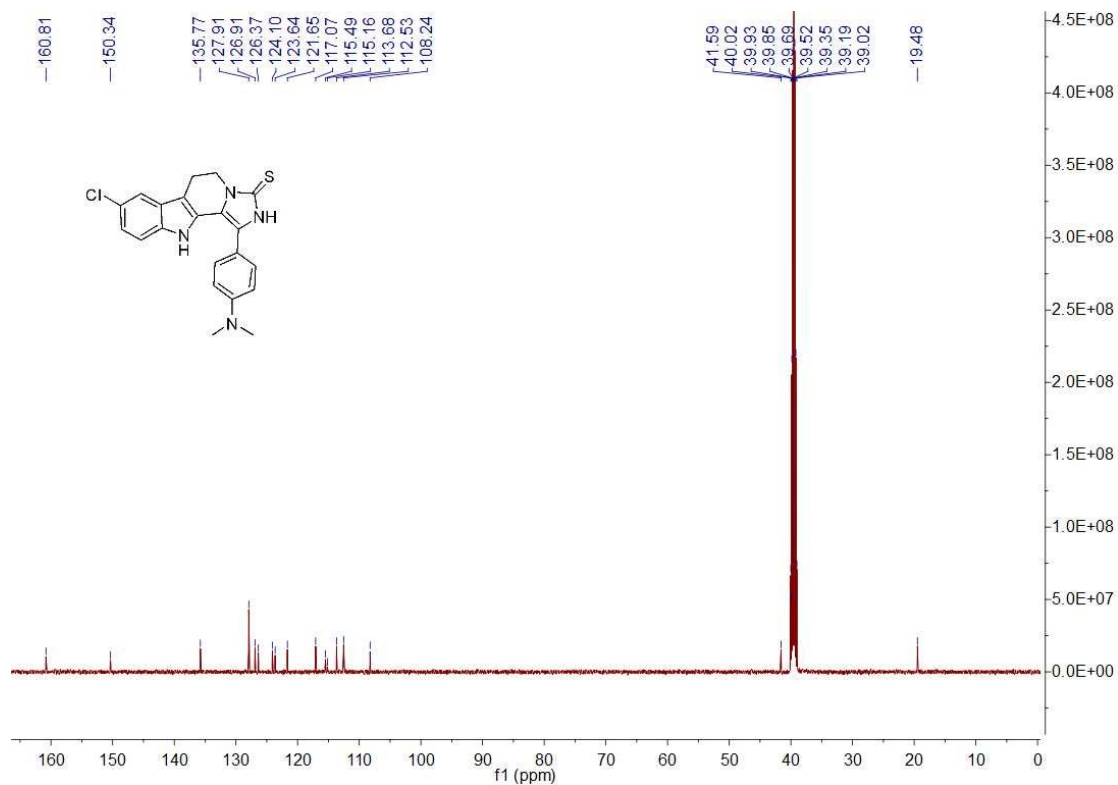



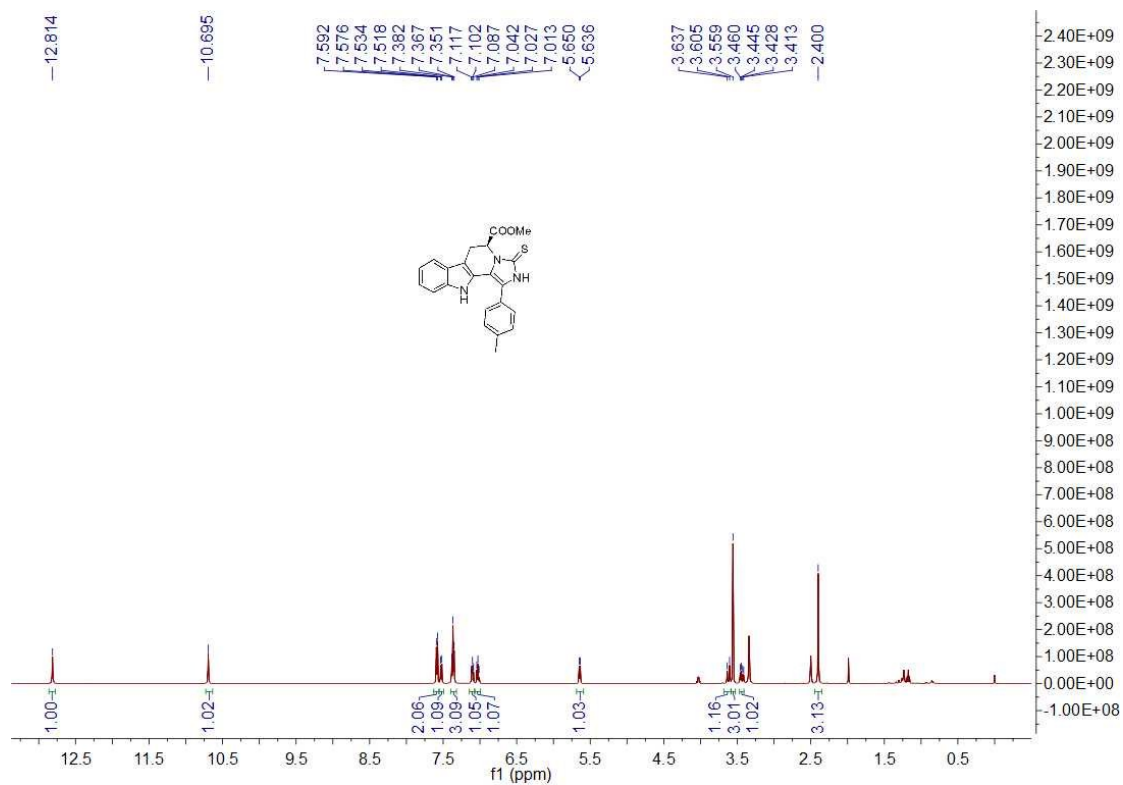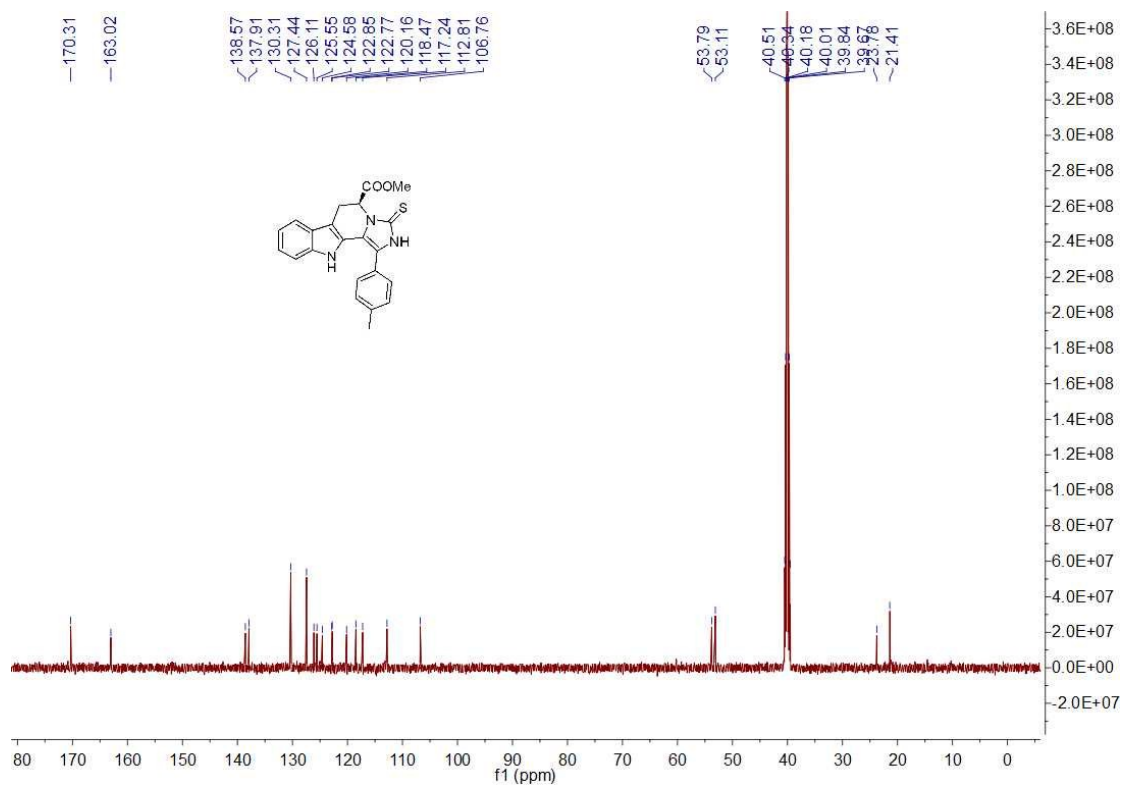

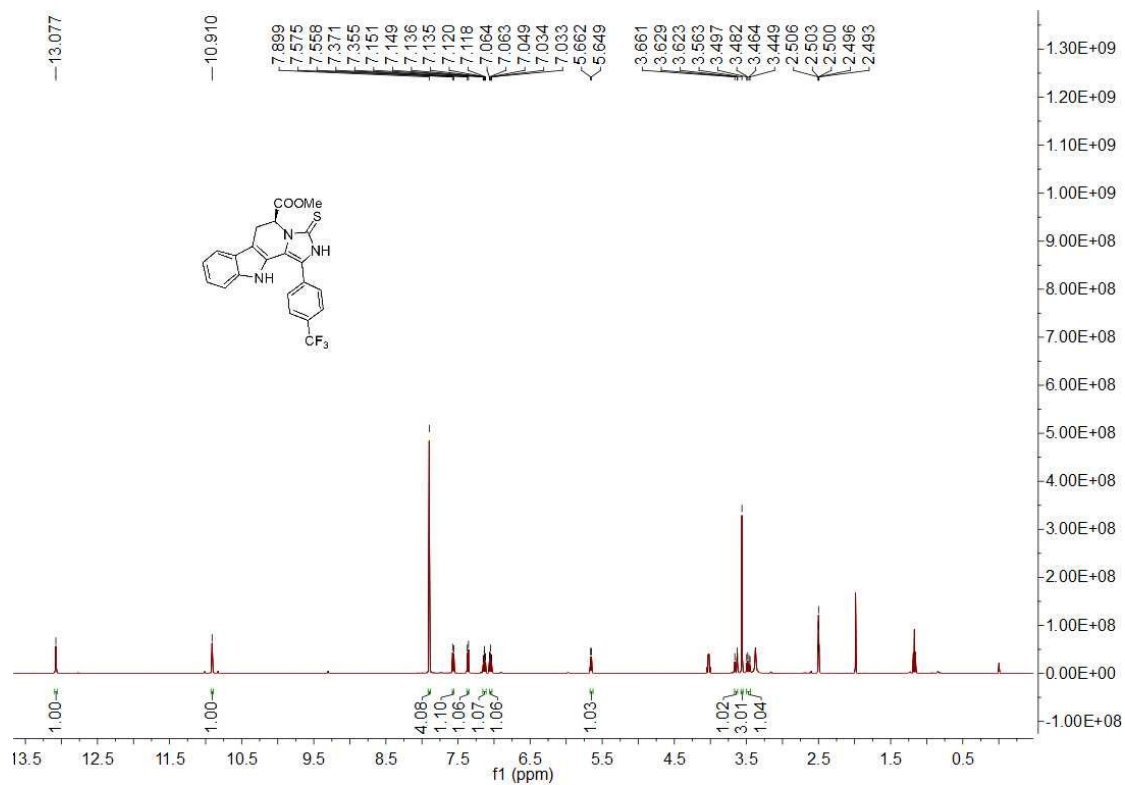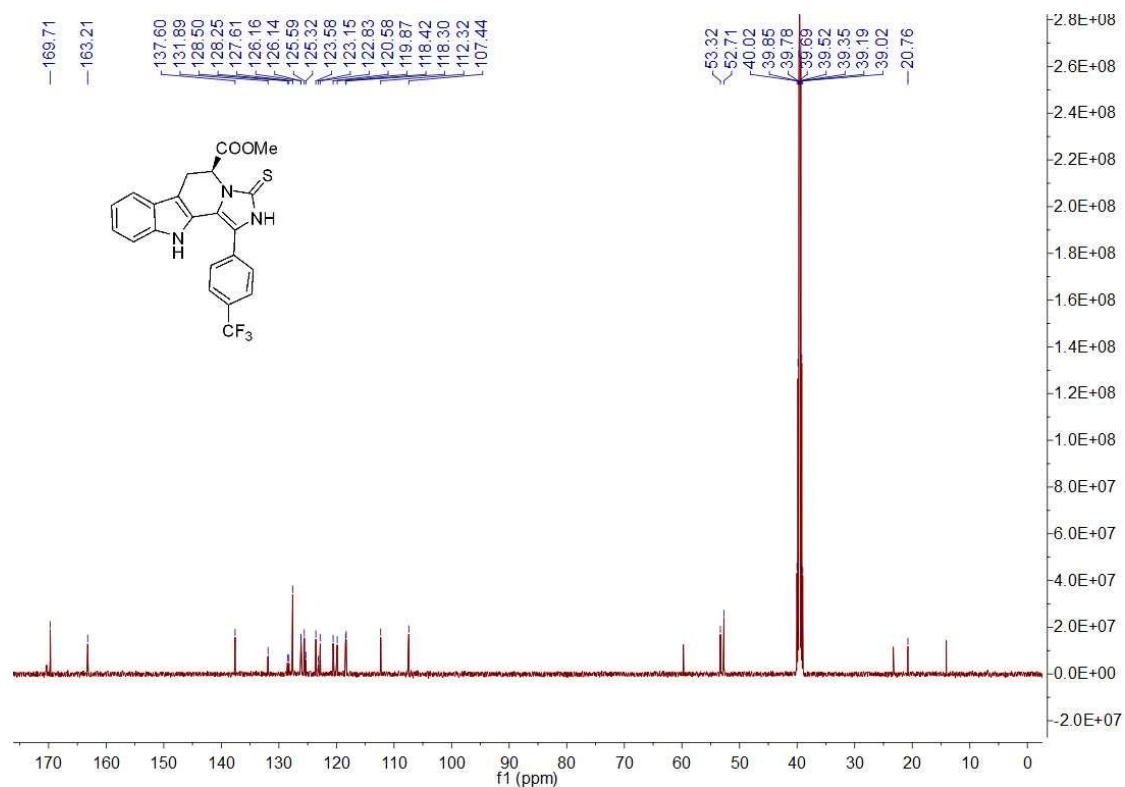



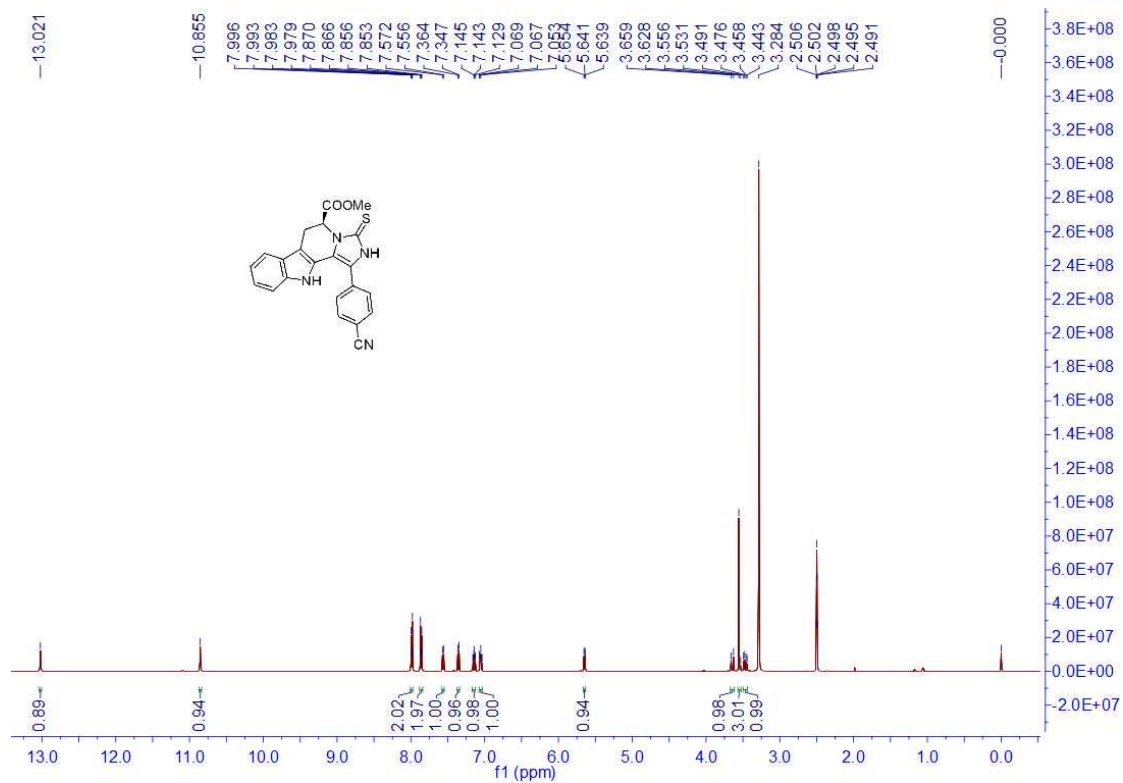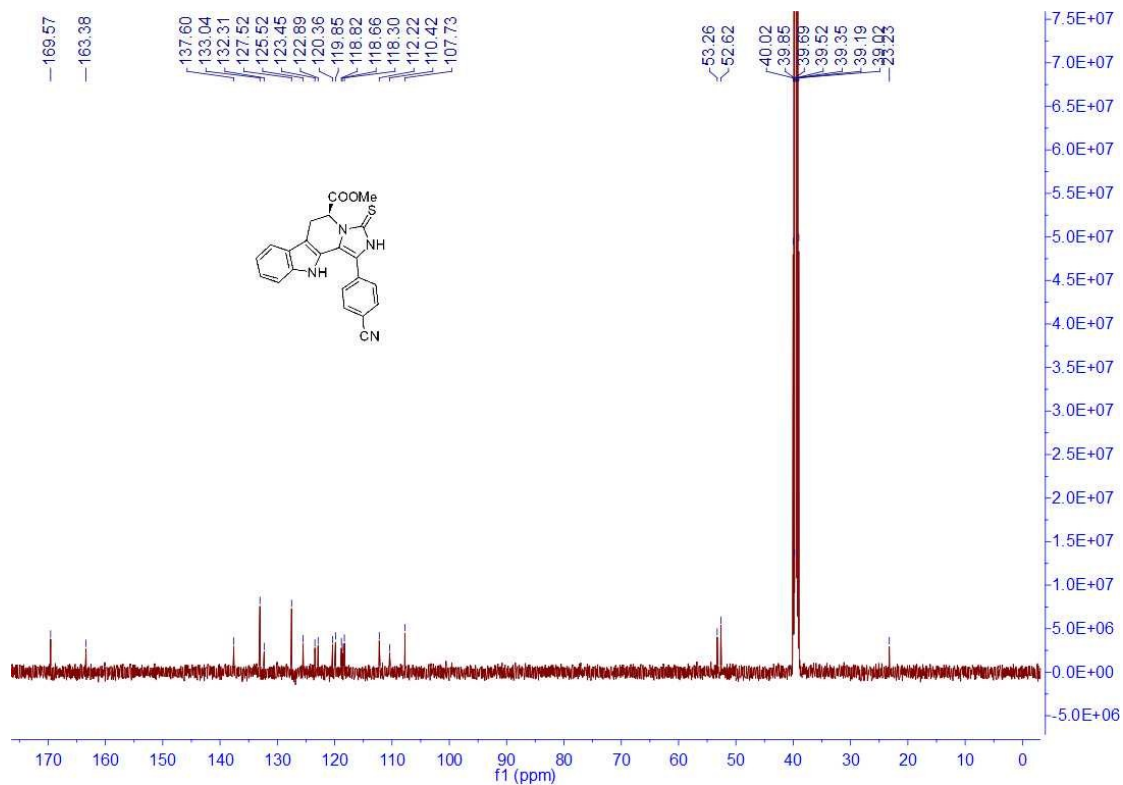



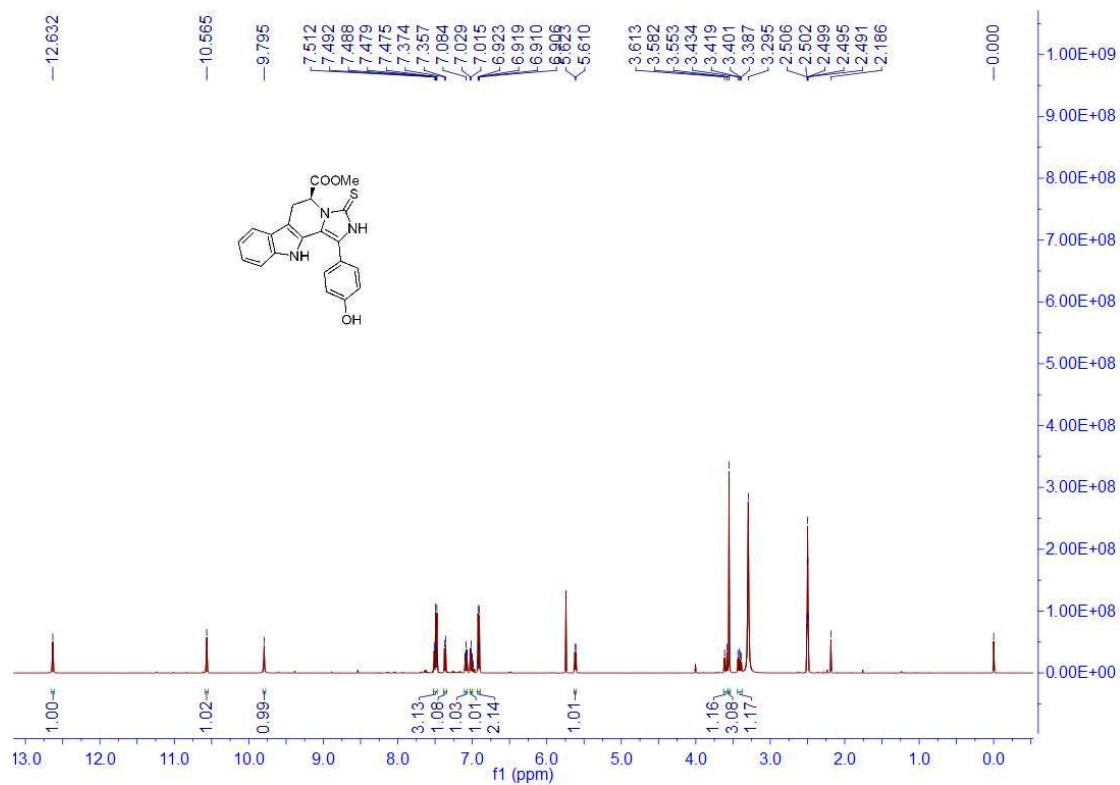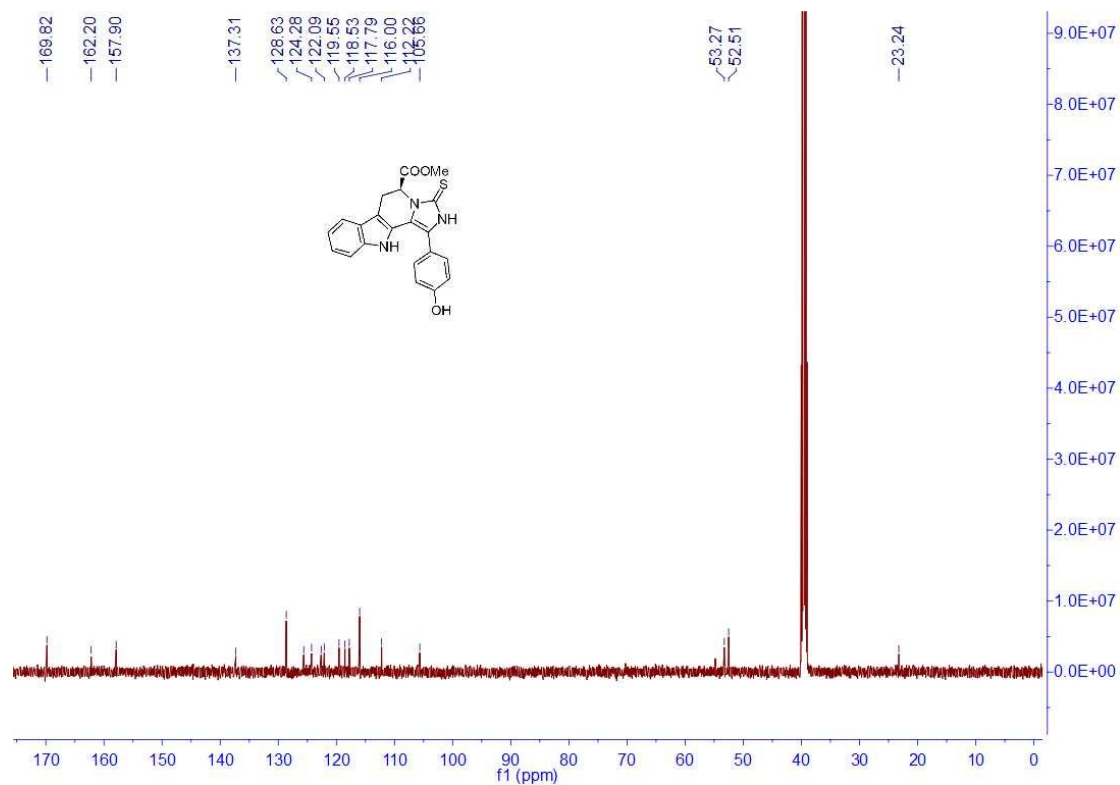

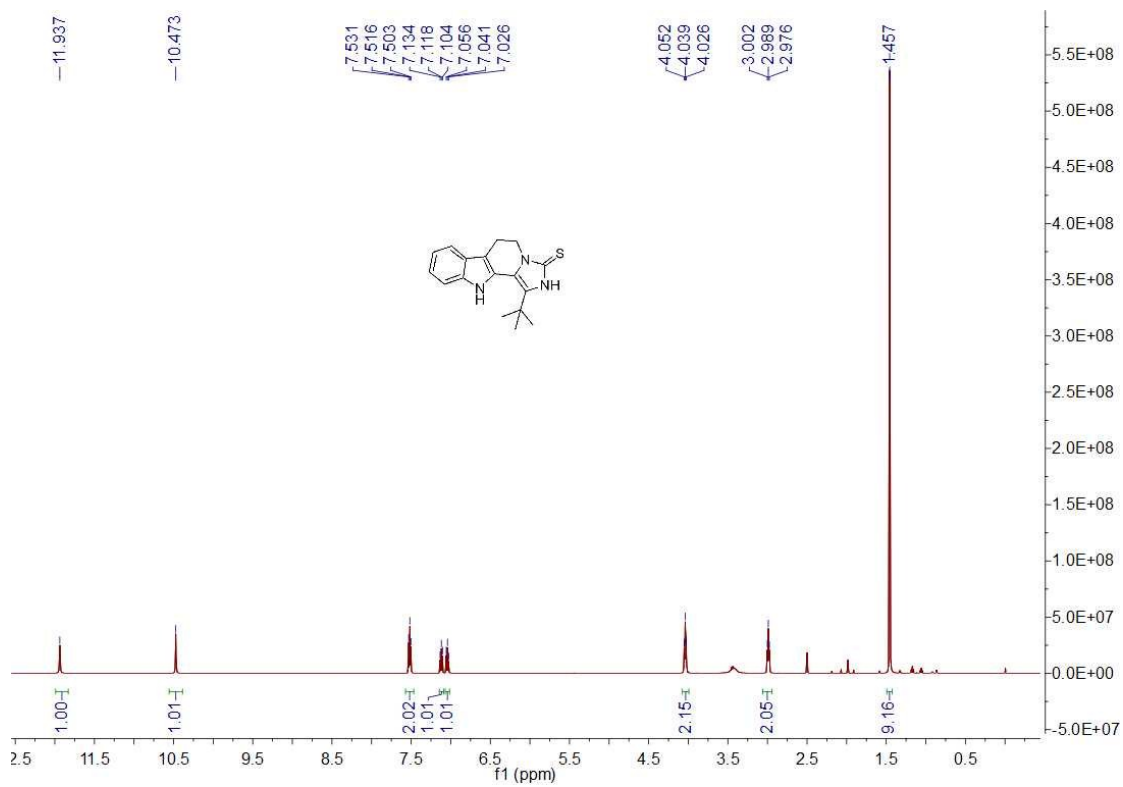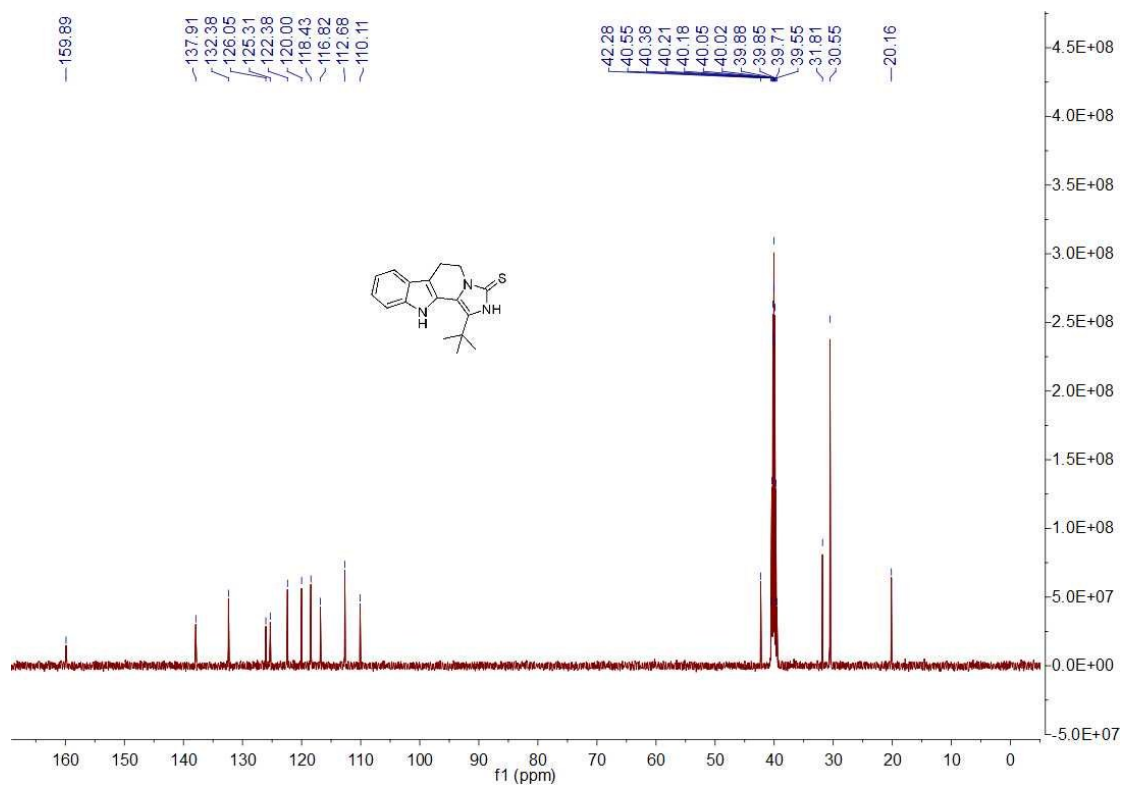

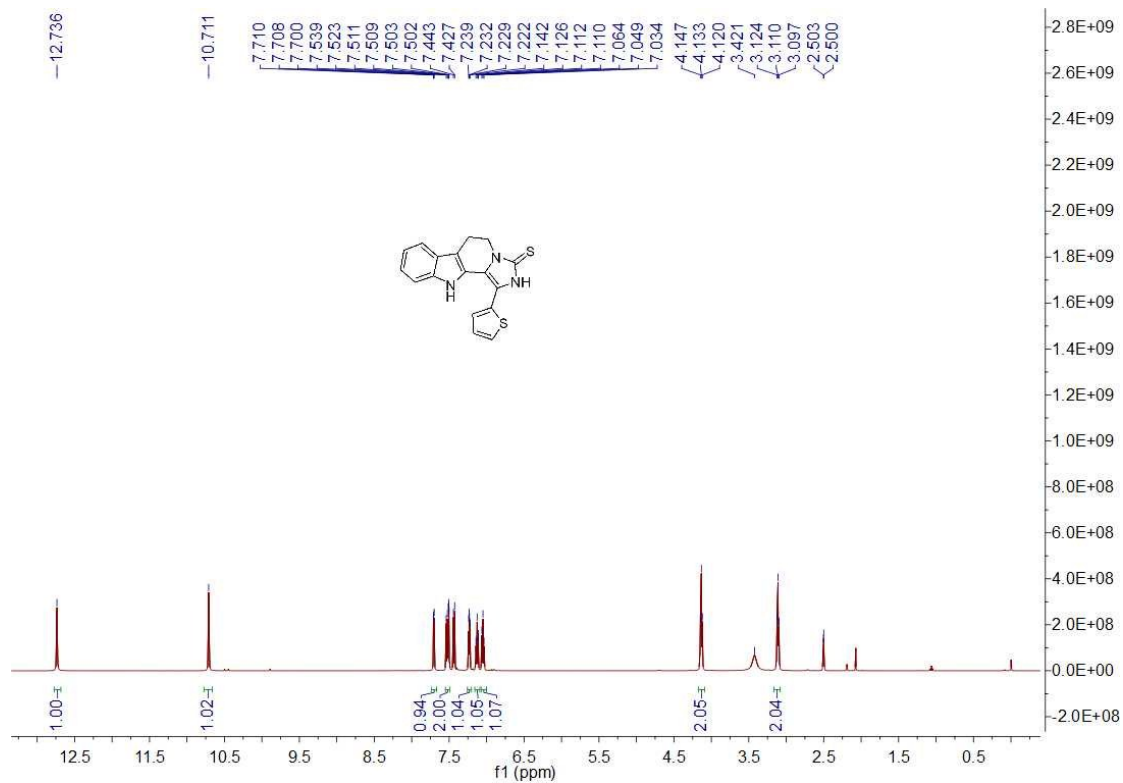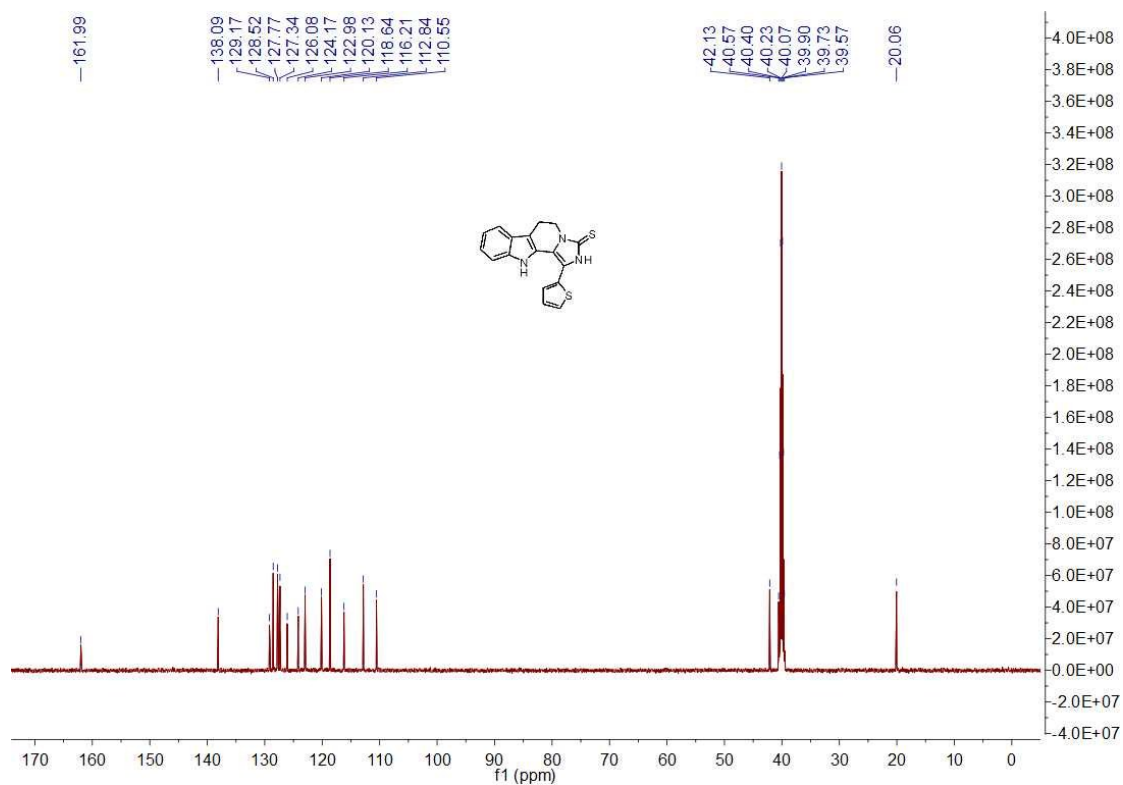

Supplement: c9cc03370j1.pdf [file c9cc03370j1.pdf]
